# Supplementary material
Source: PubMed Central journal article supplement (PMC3160647)

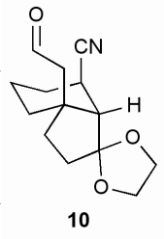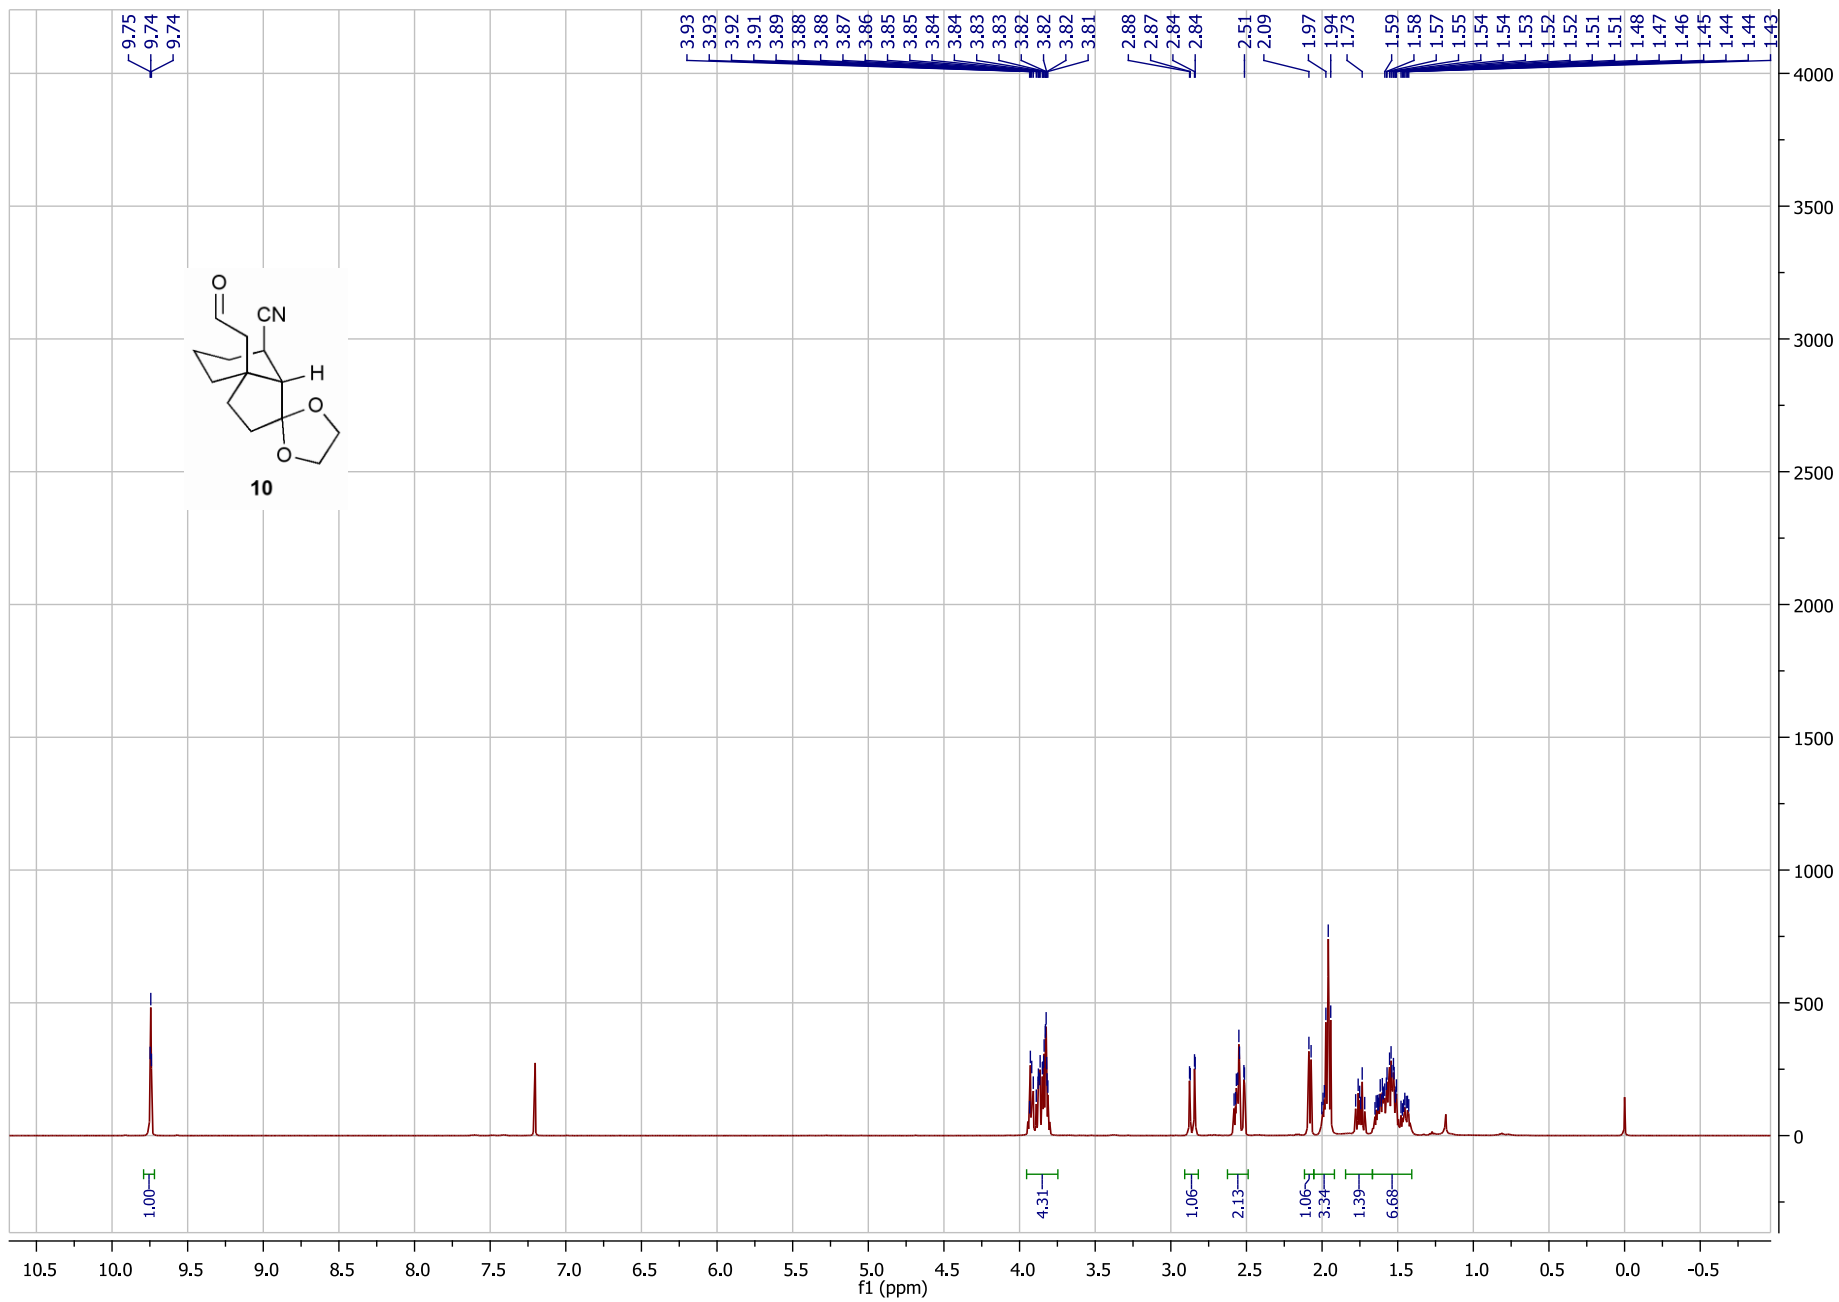

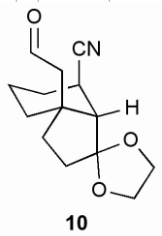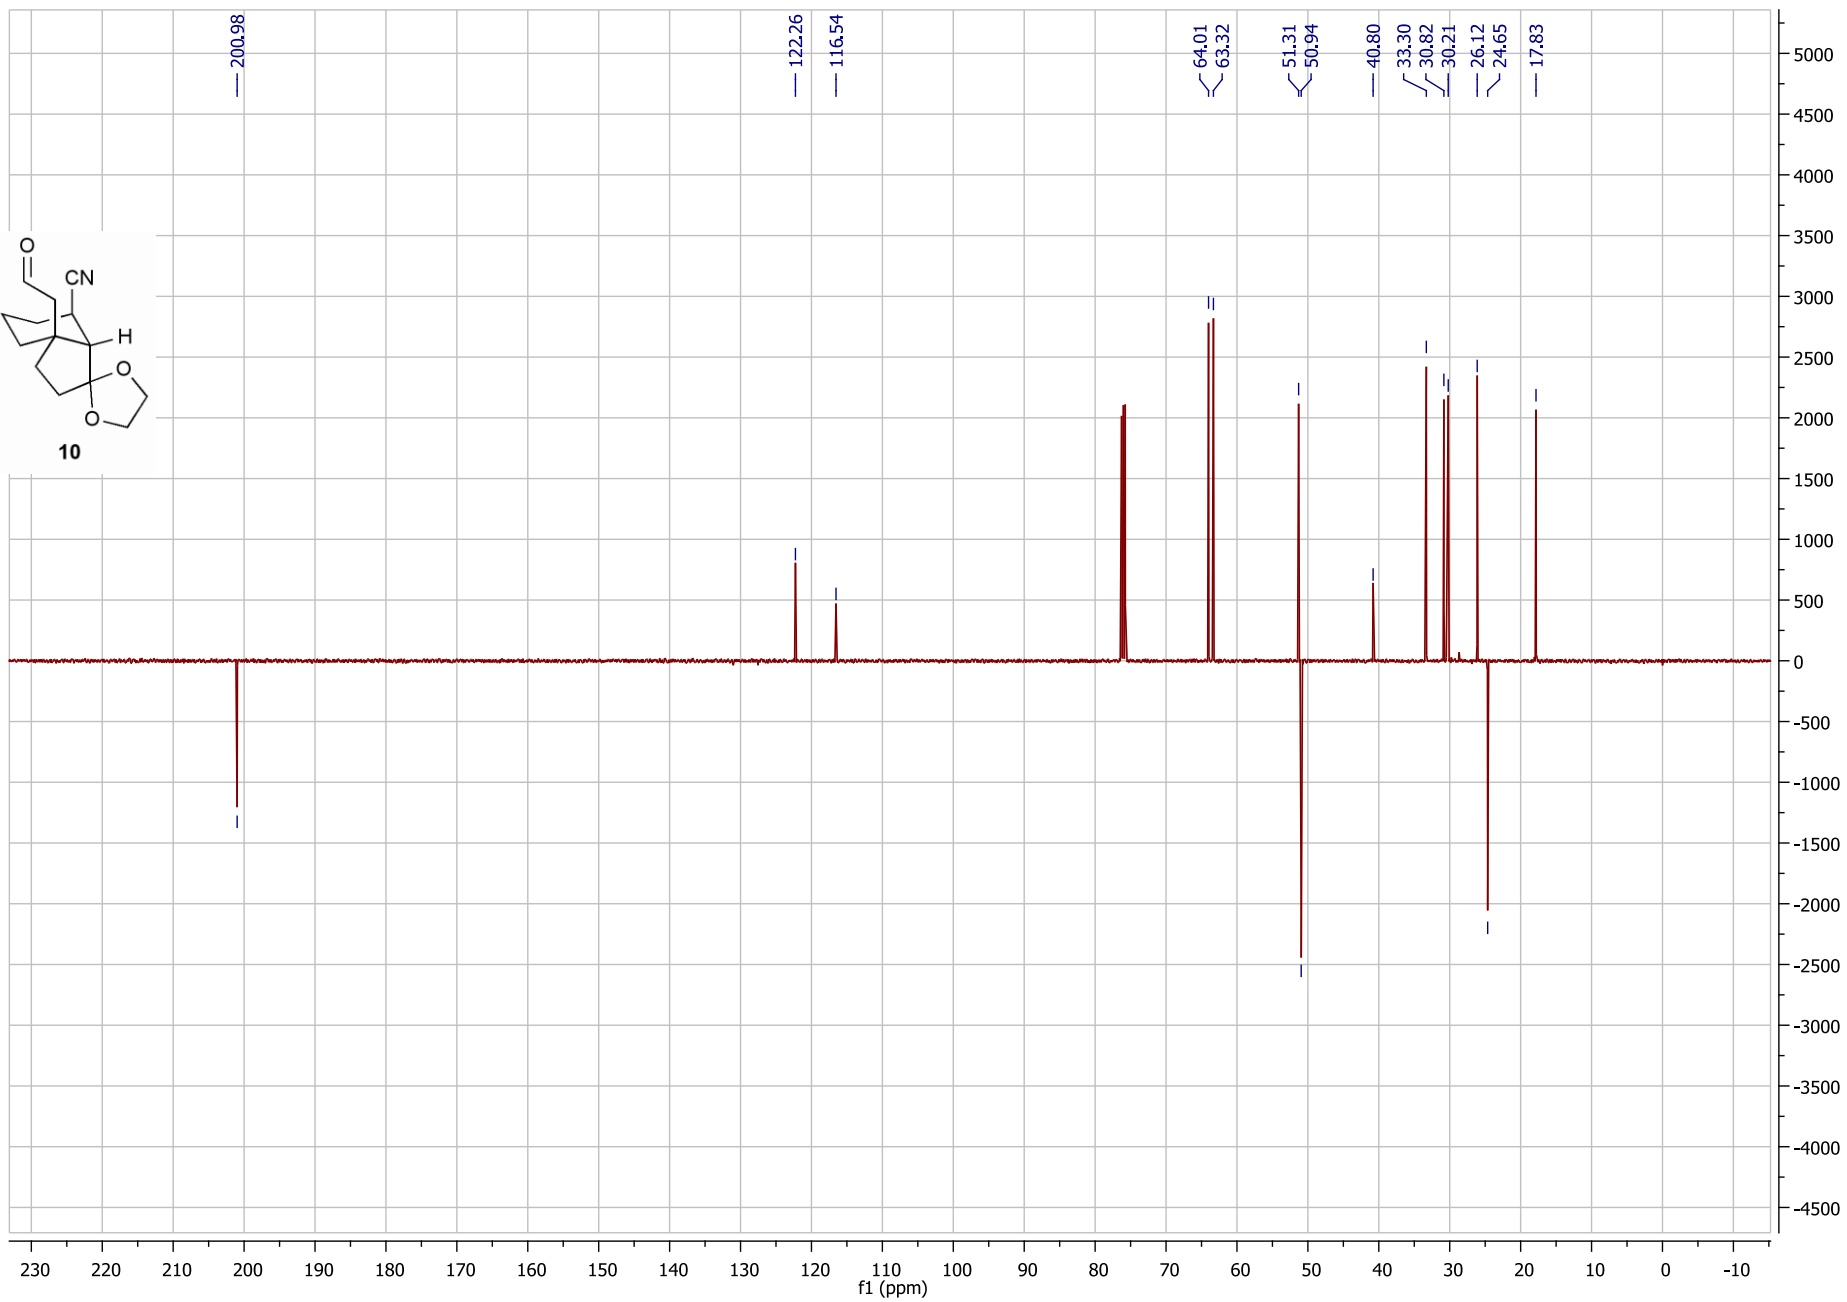

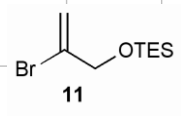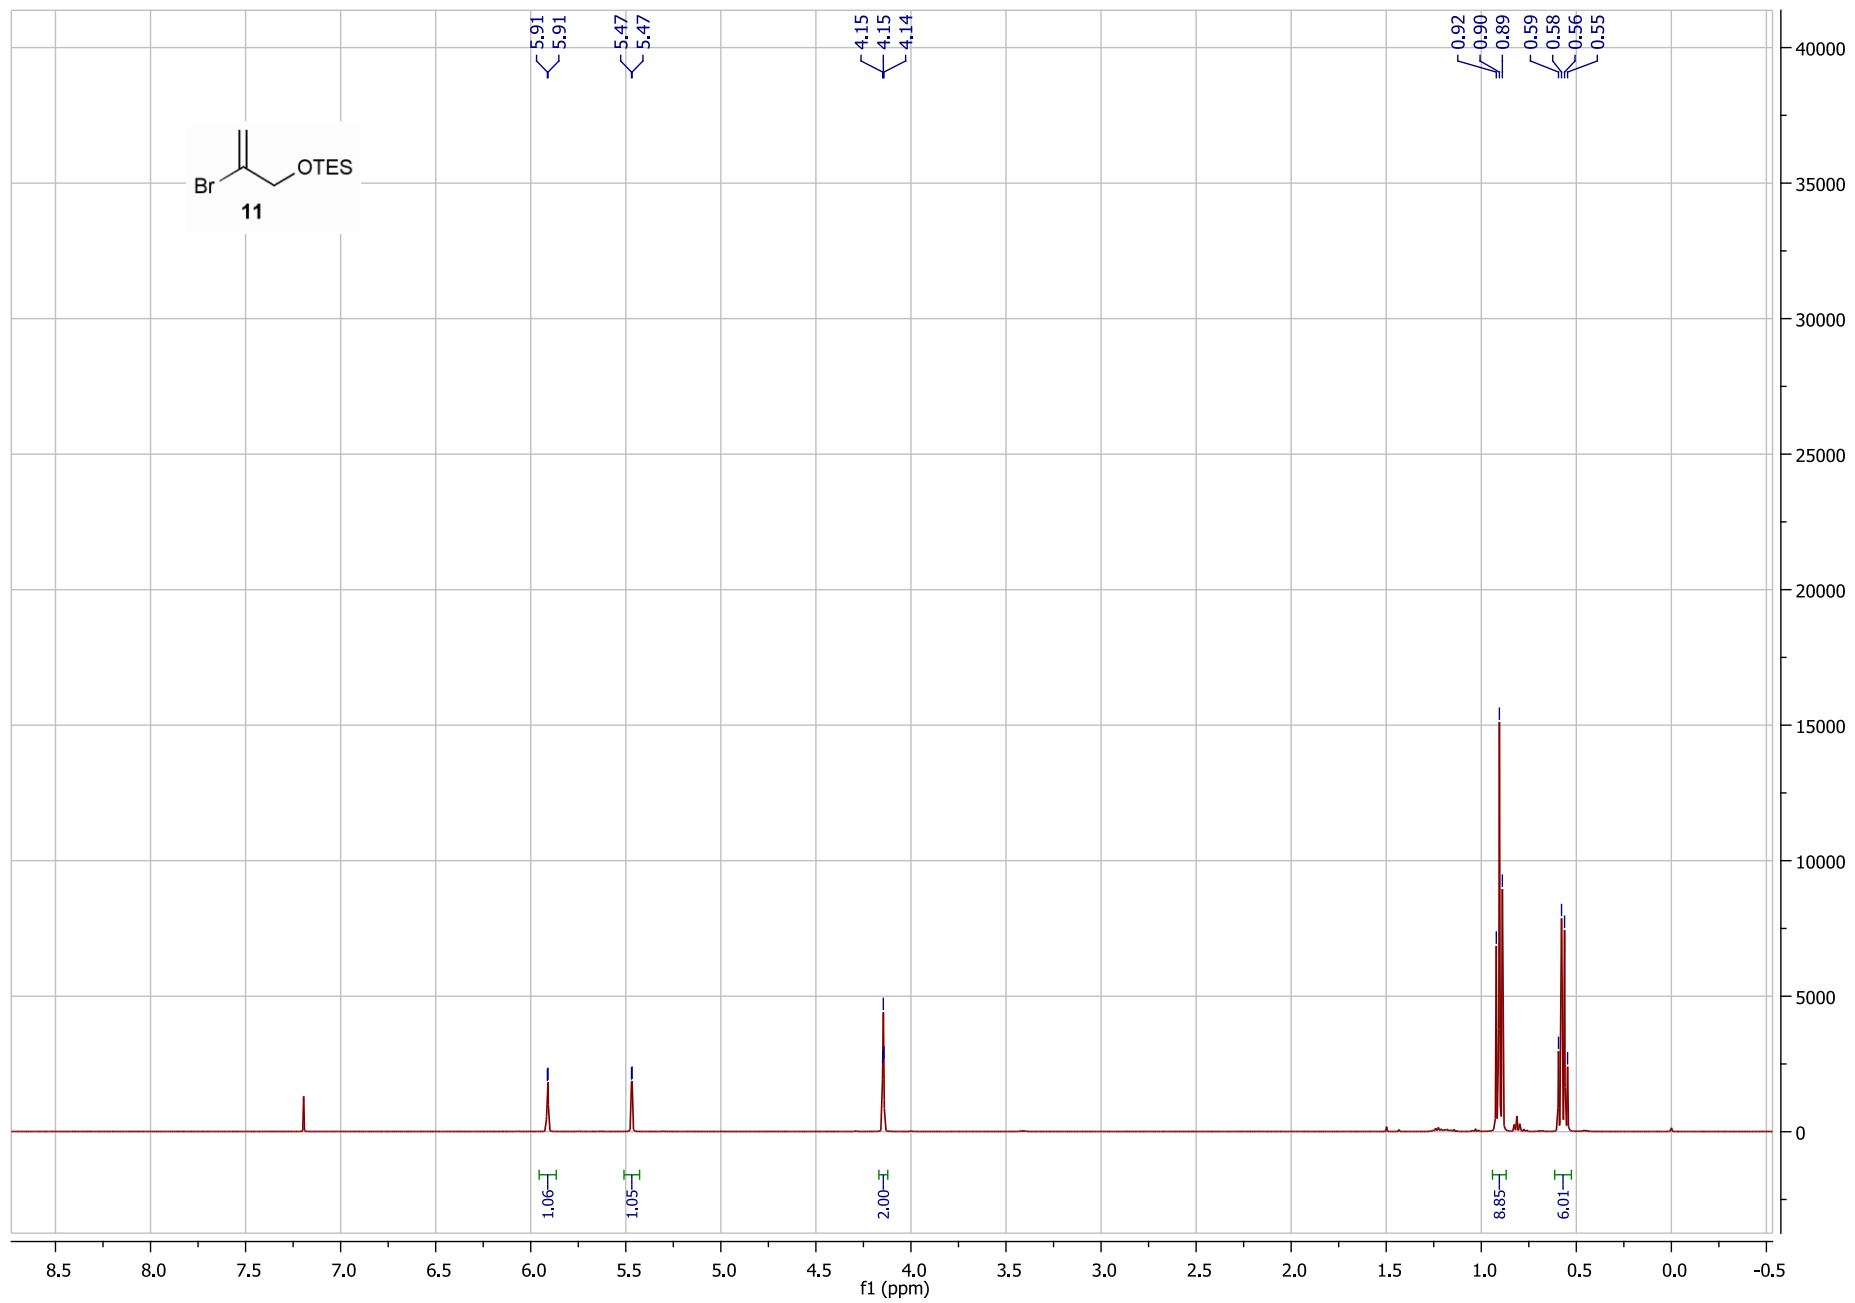

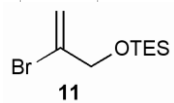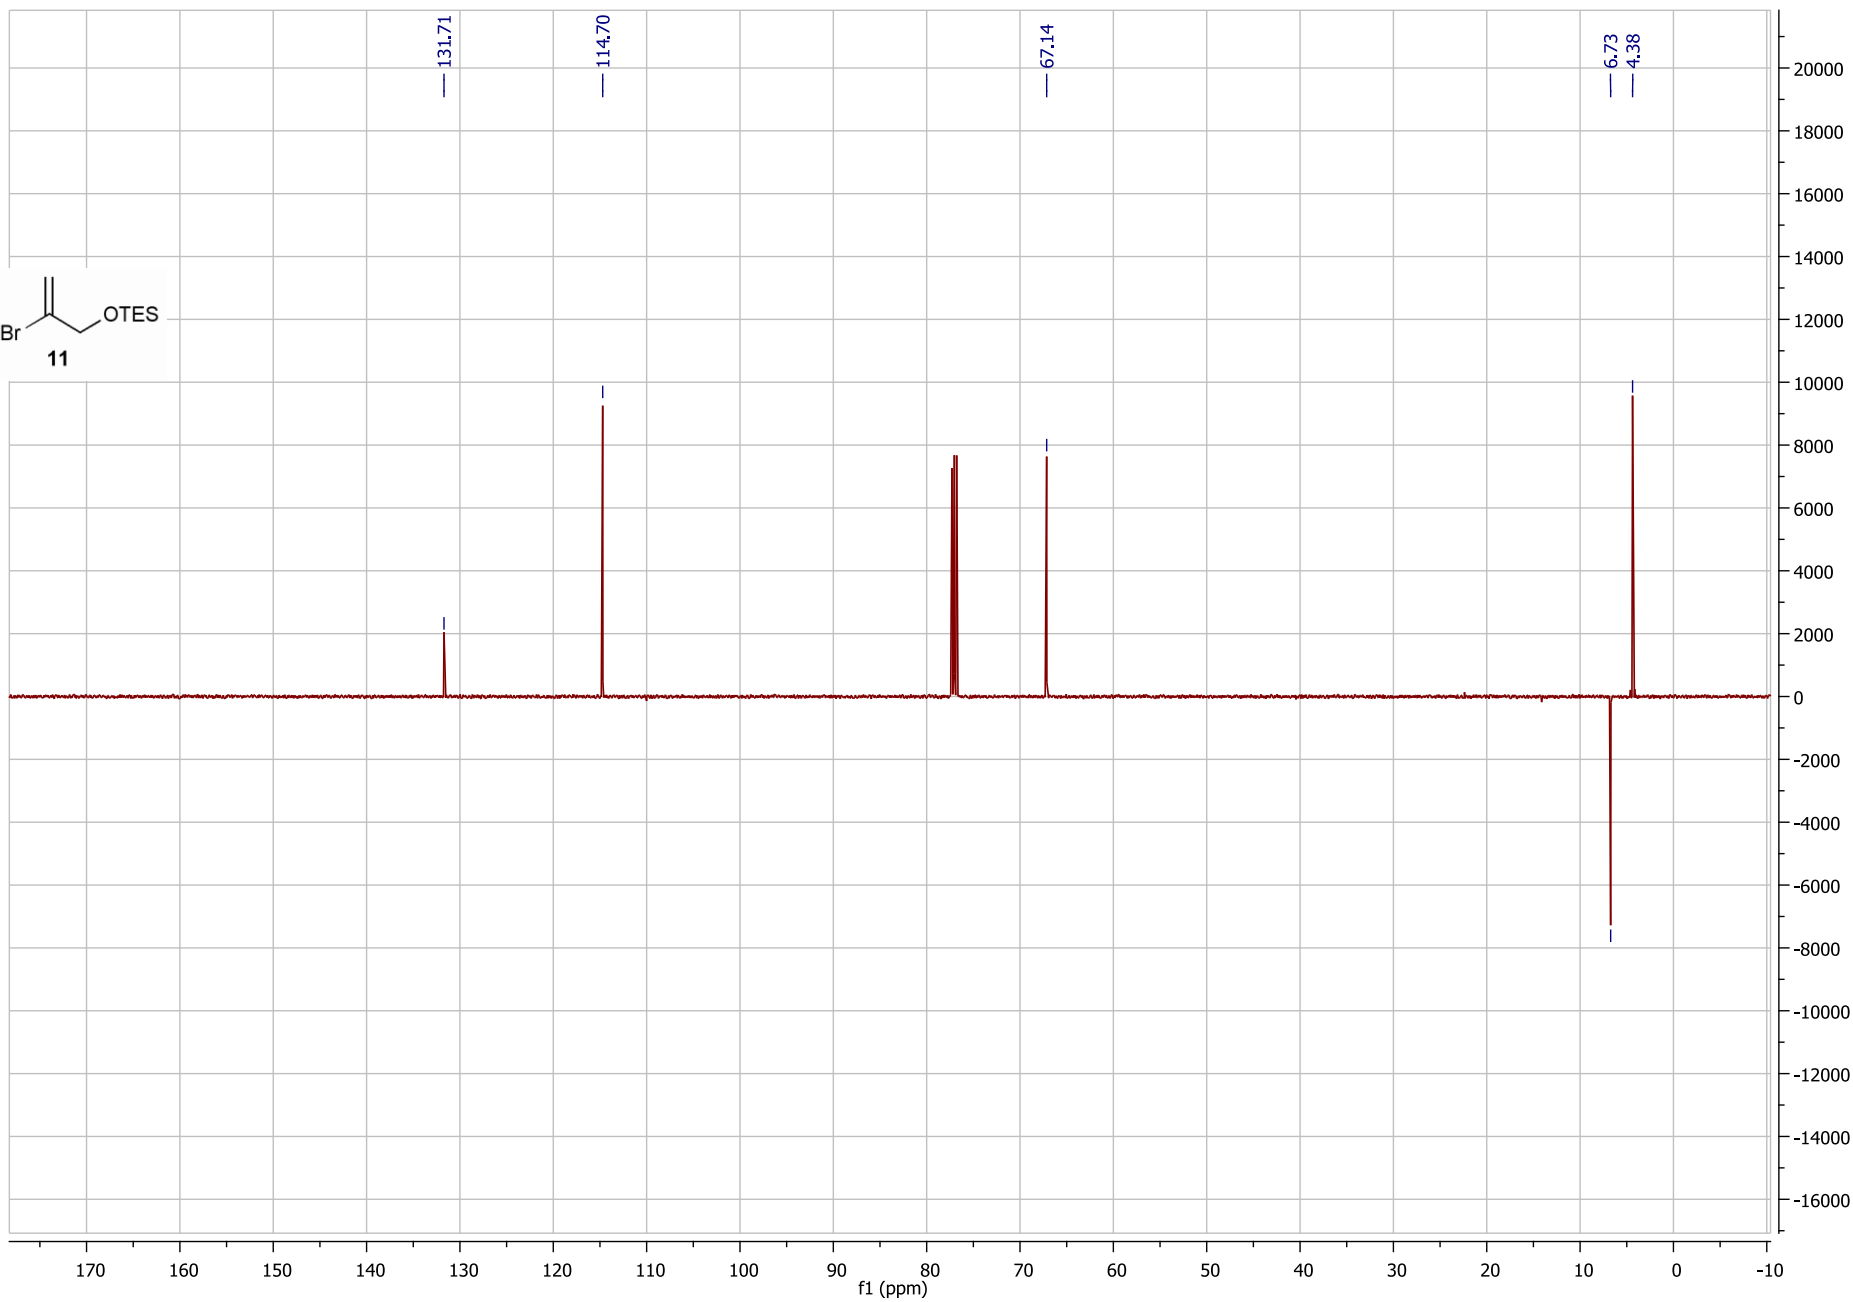

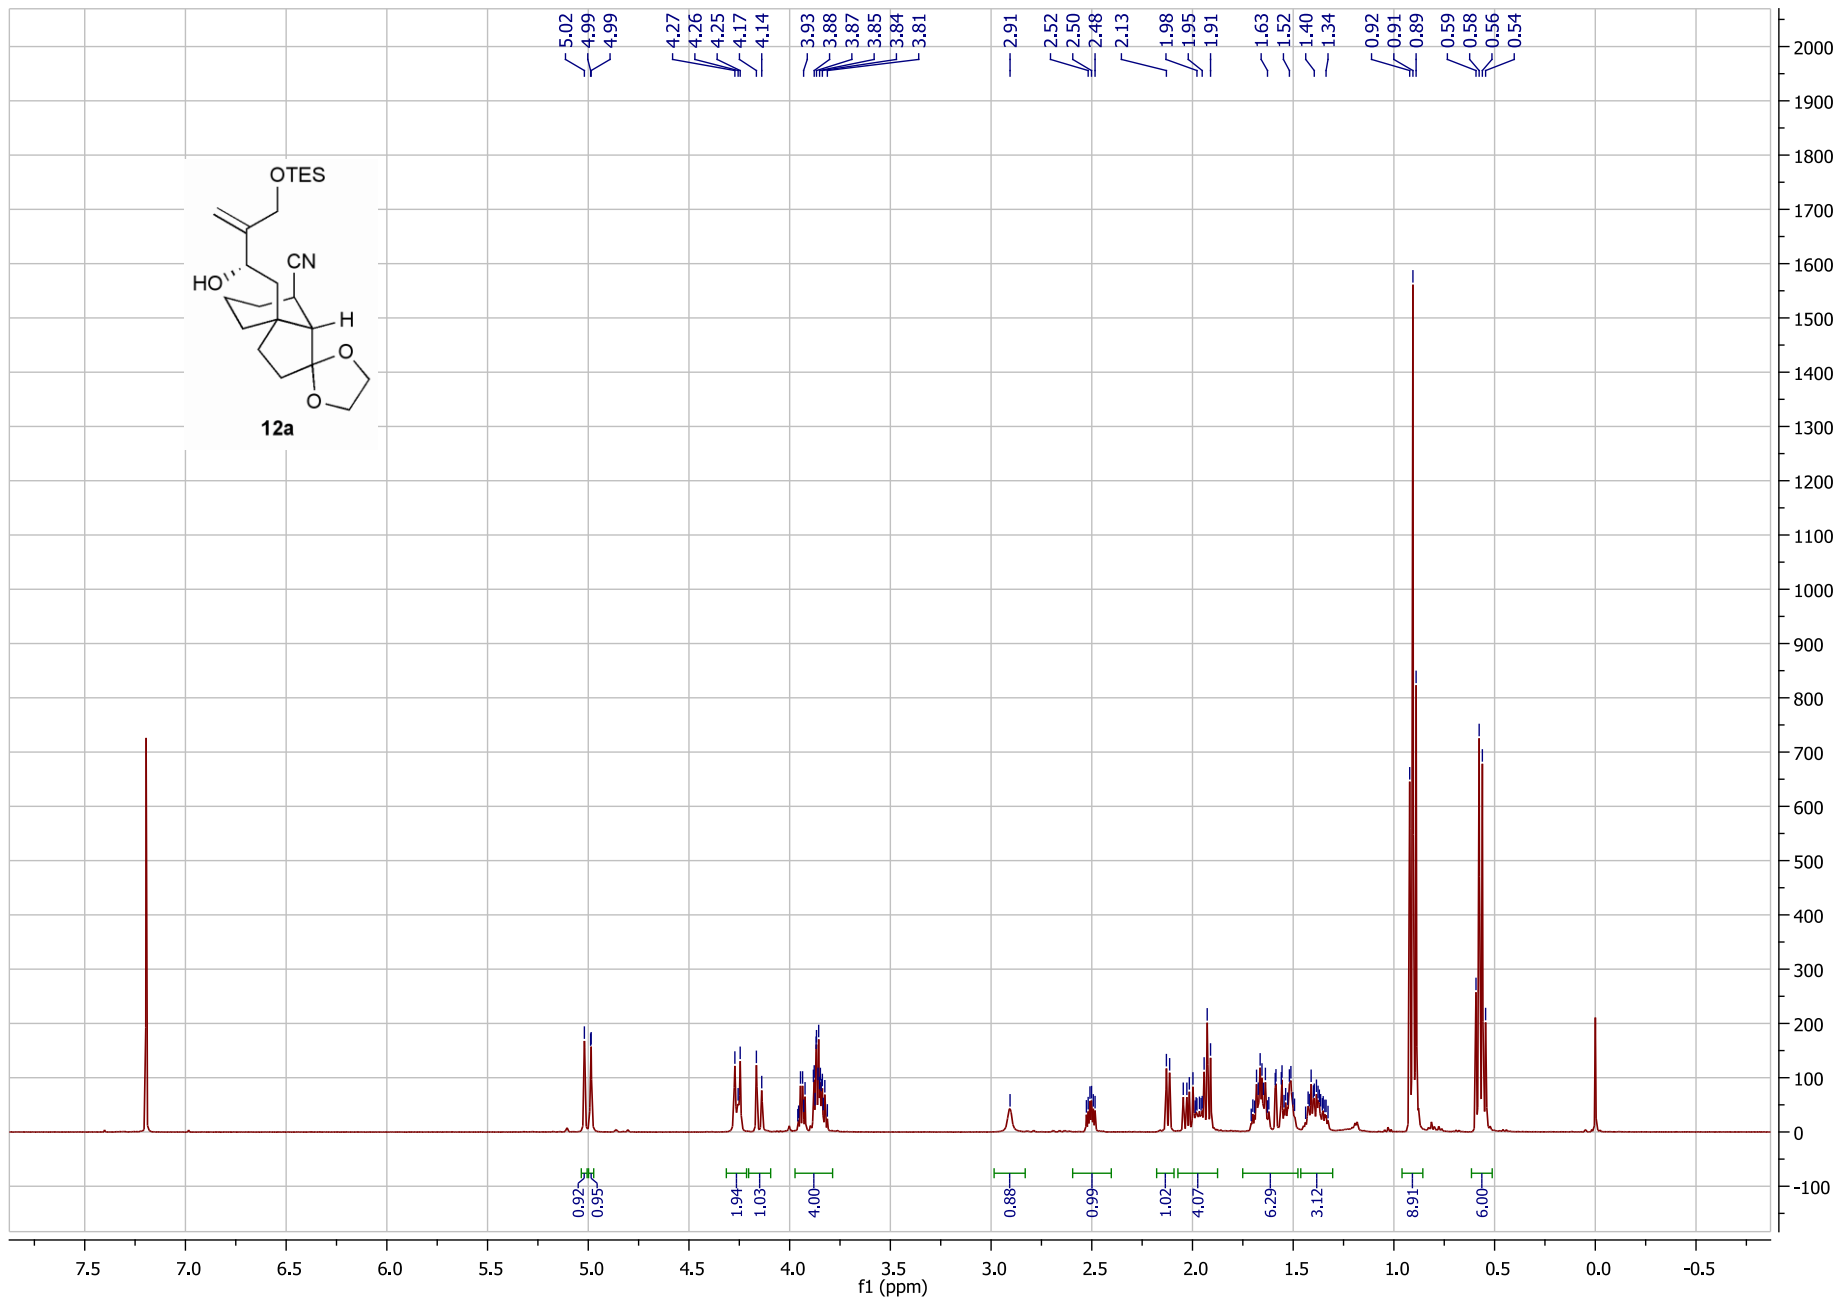

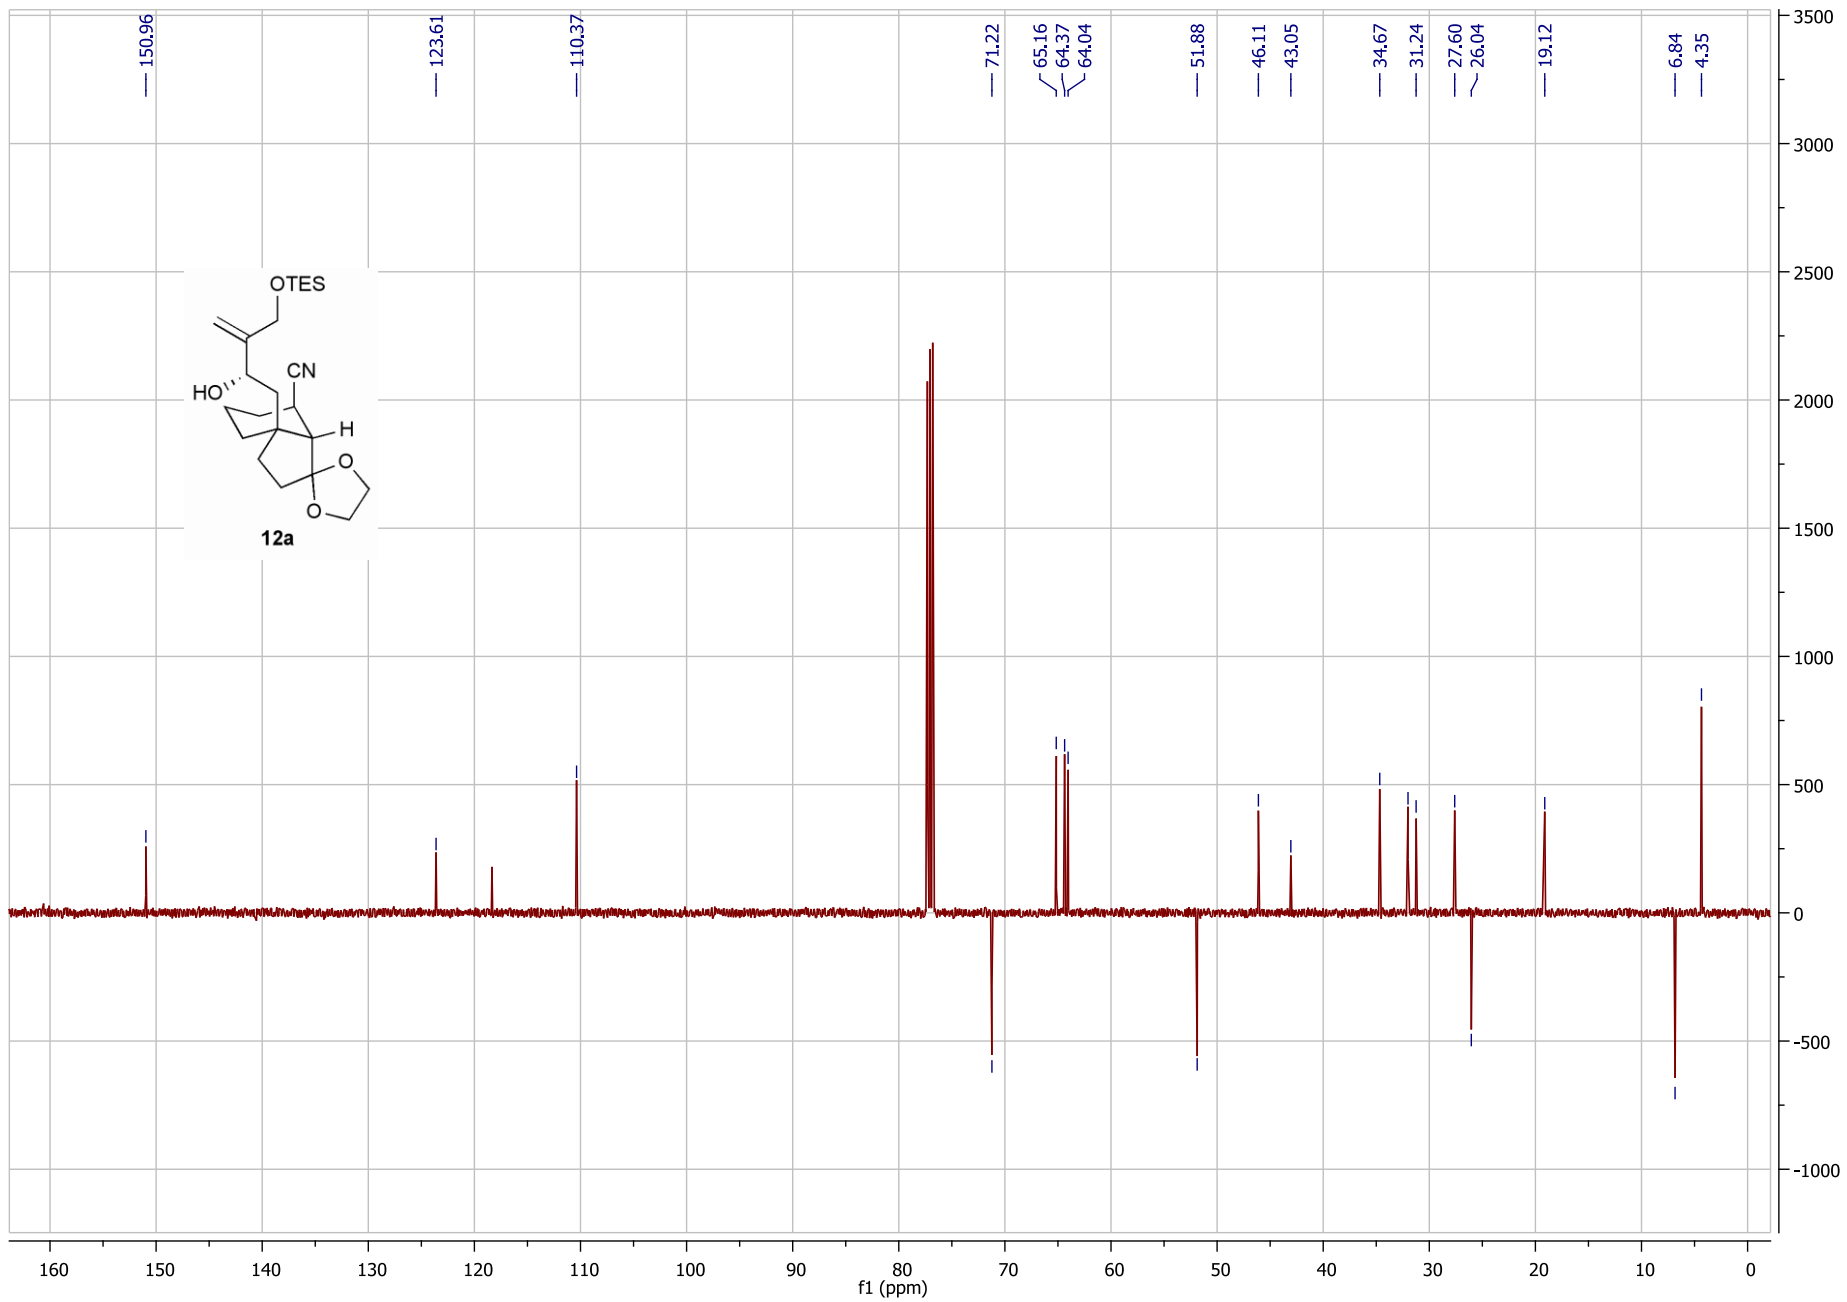

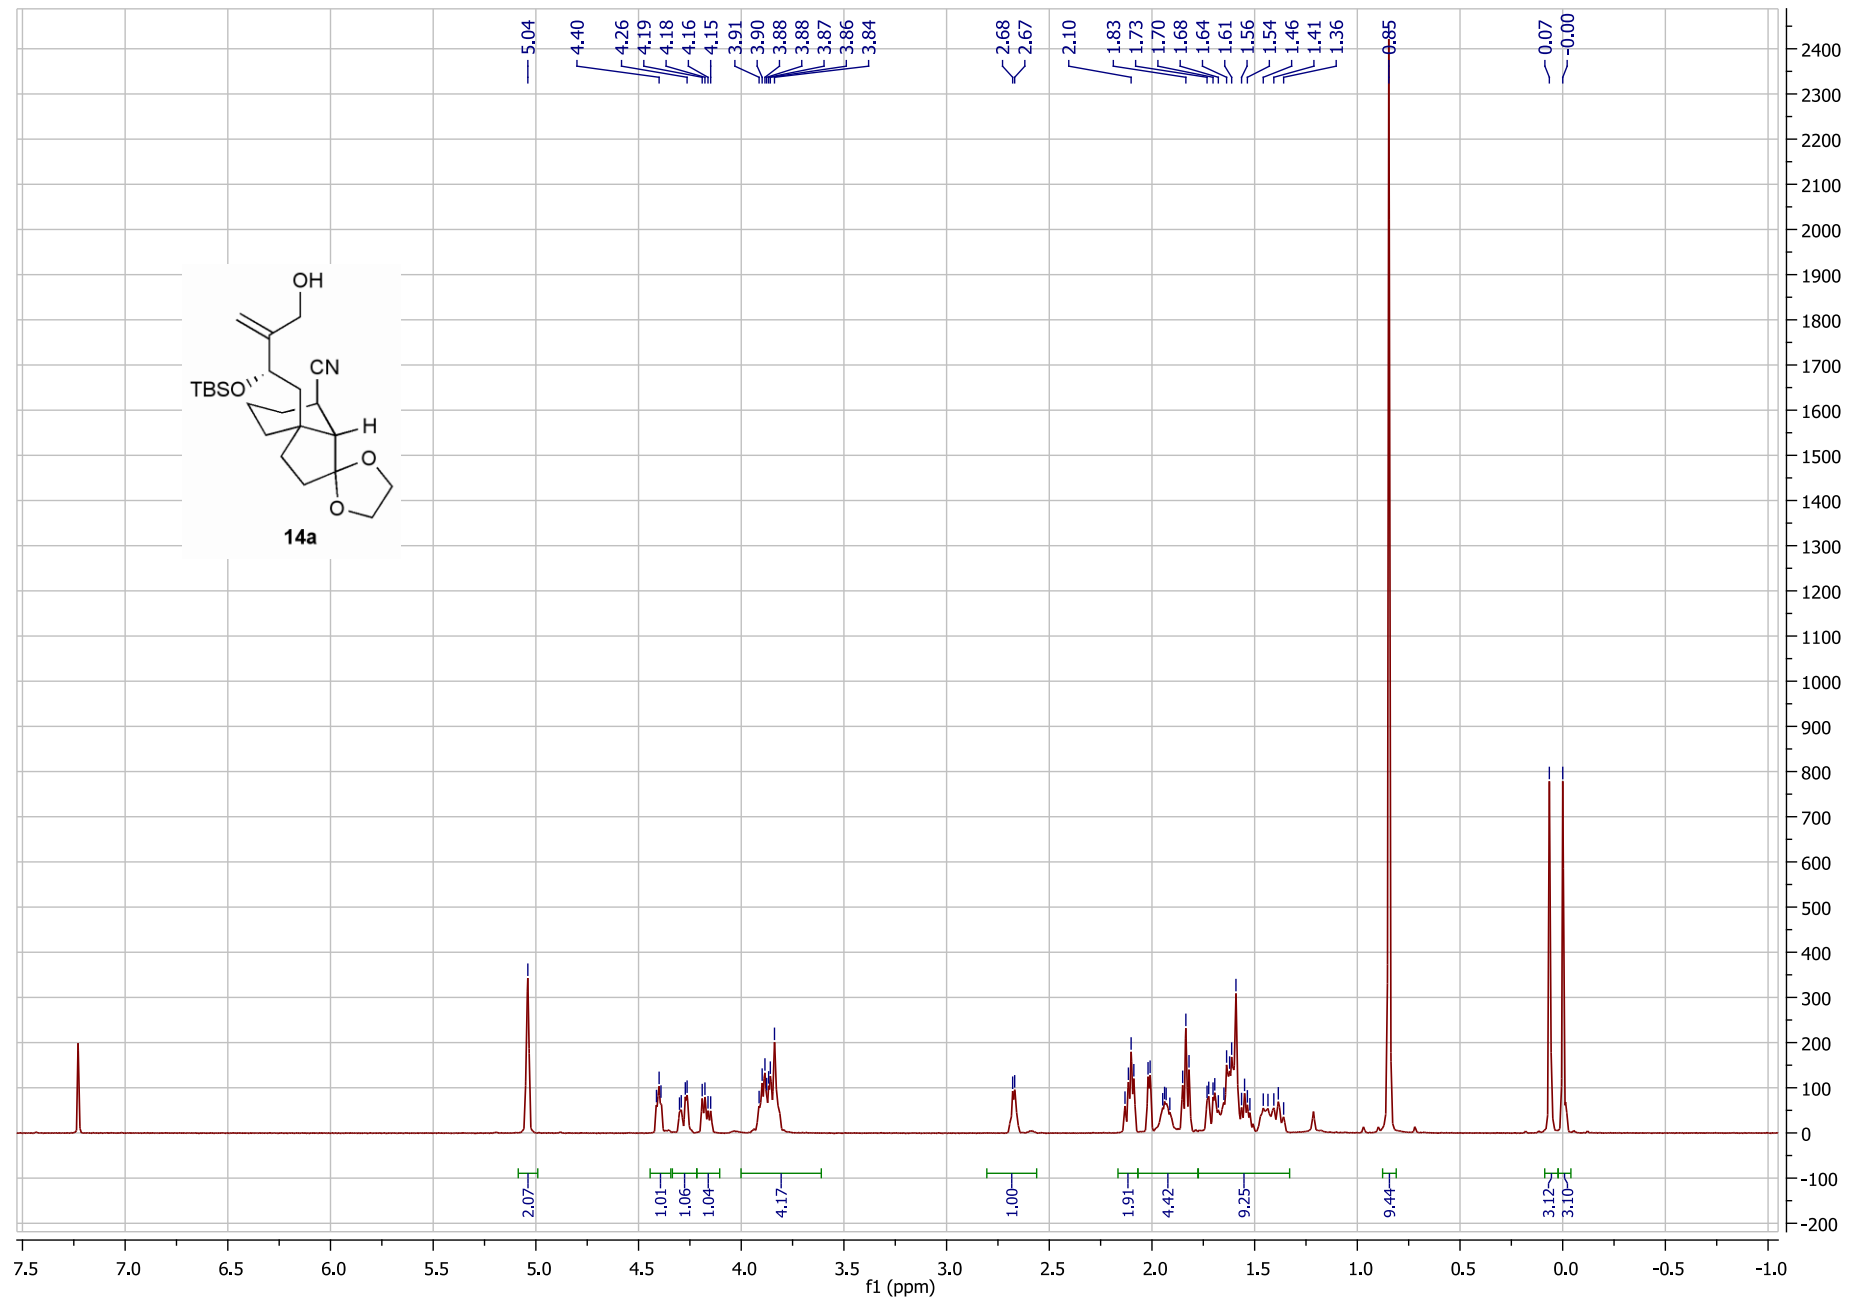

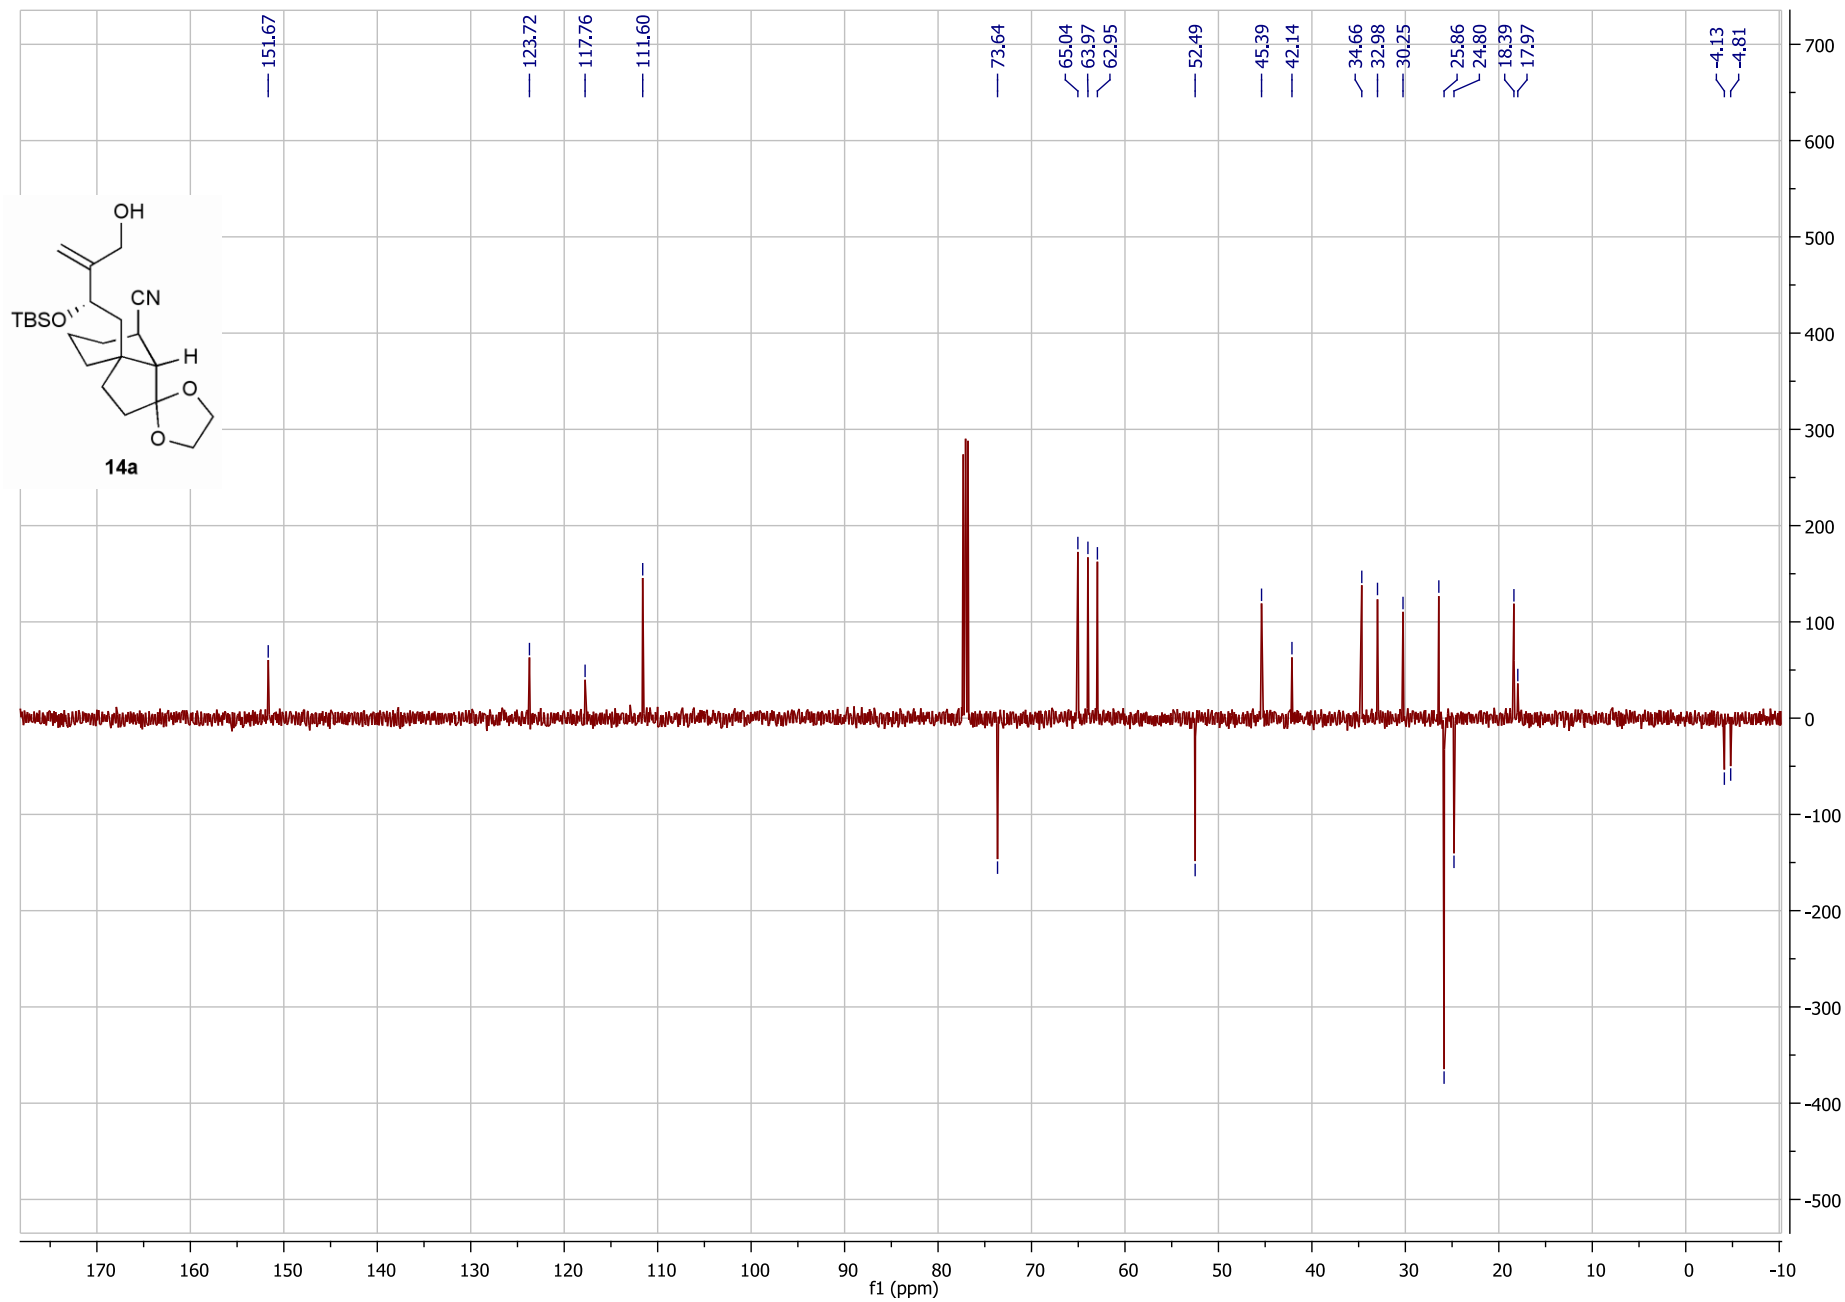



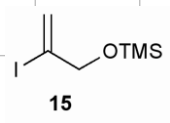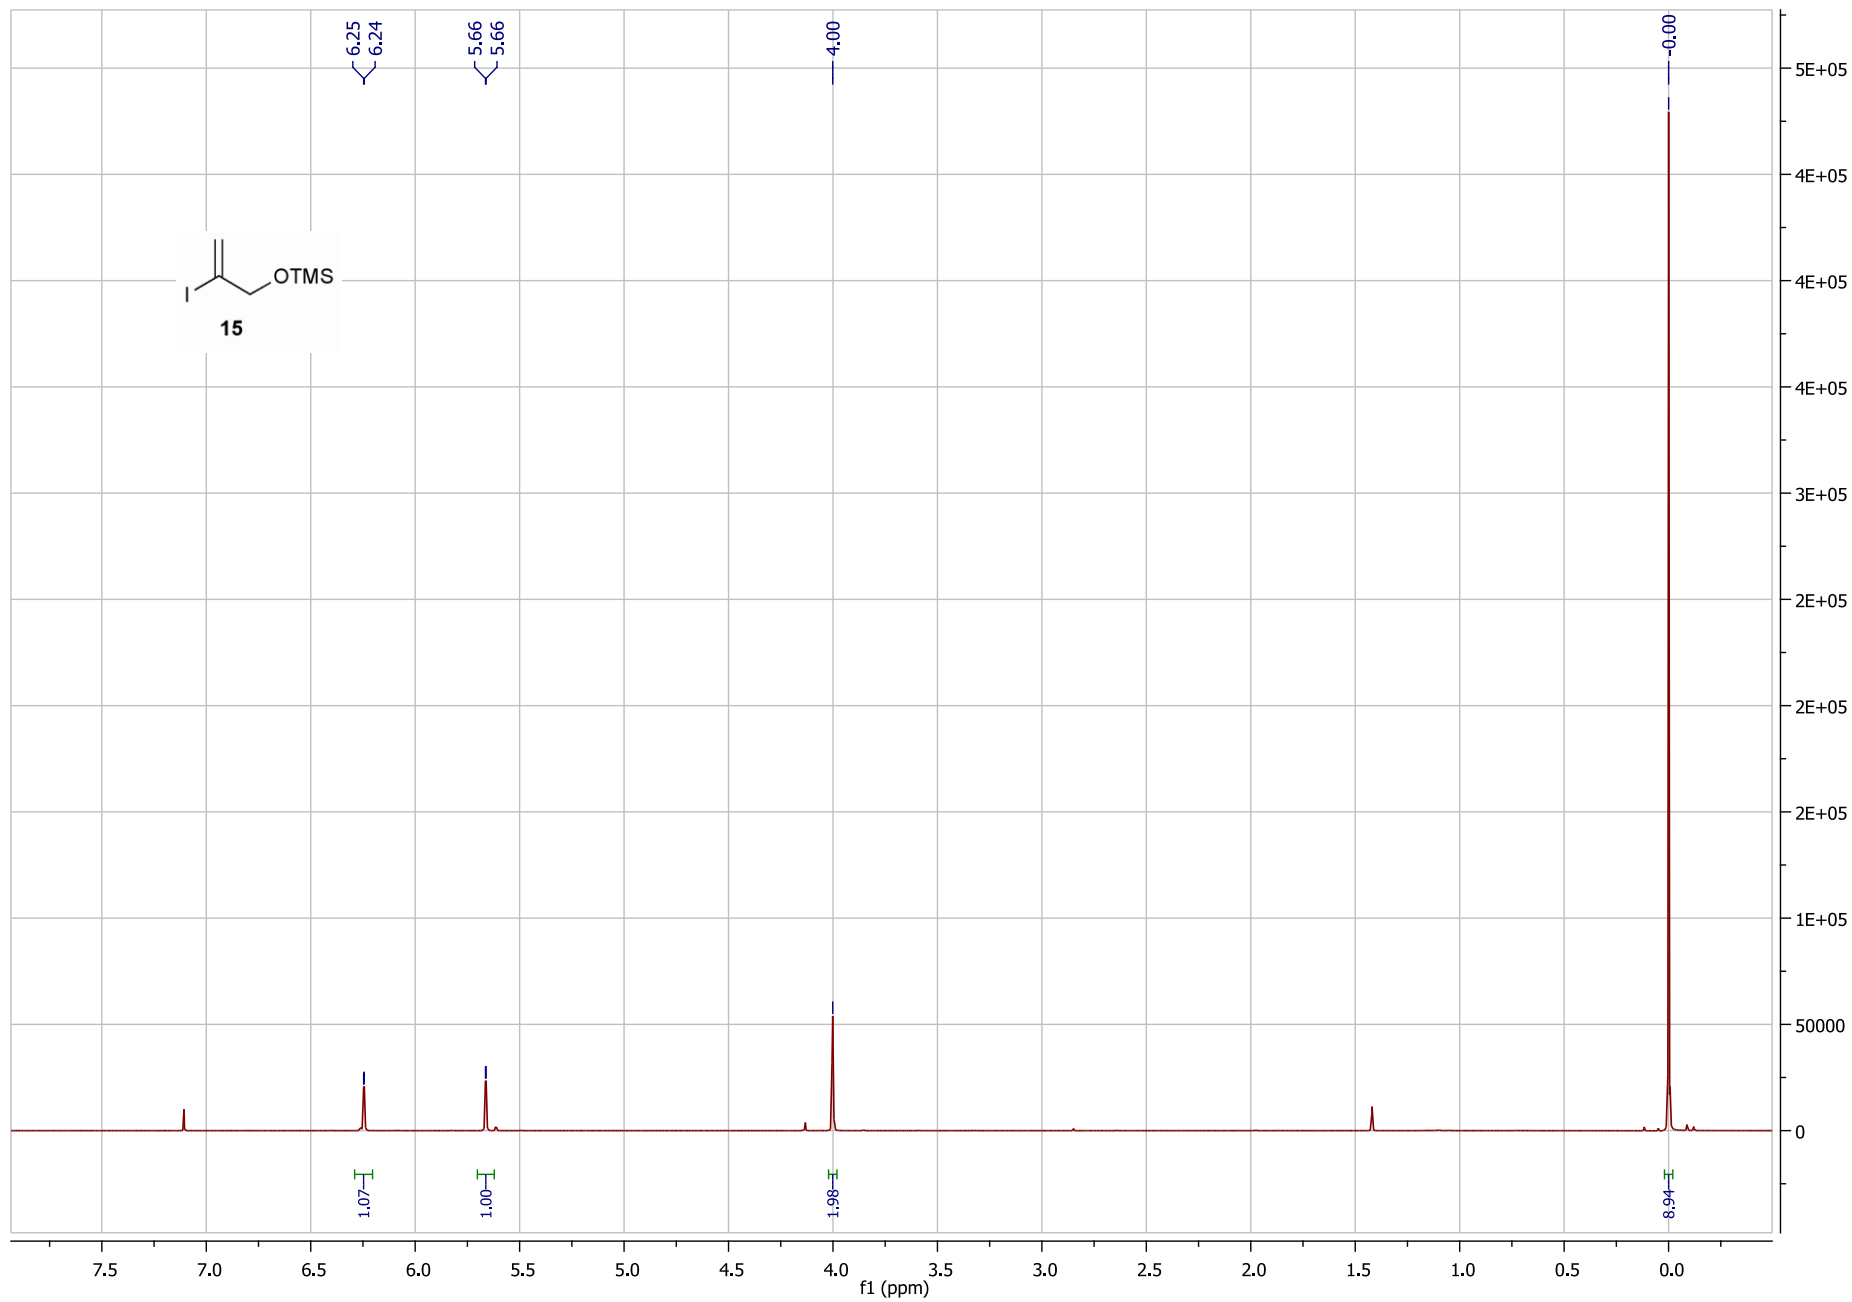

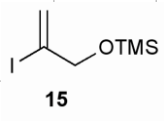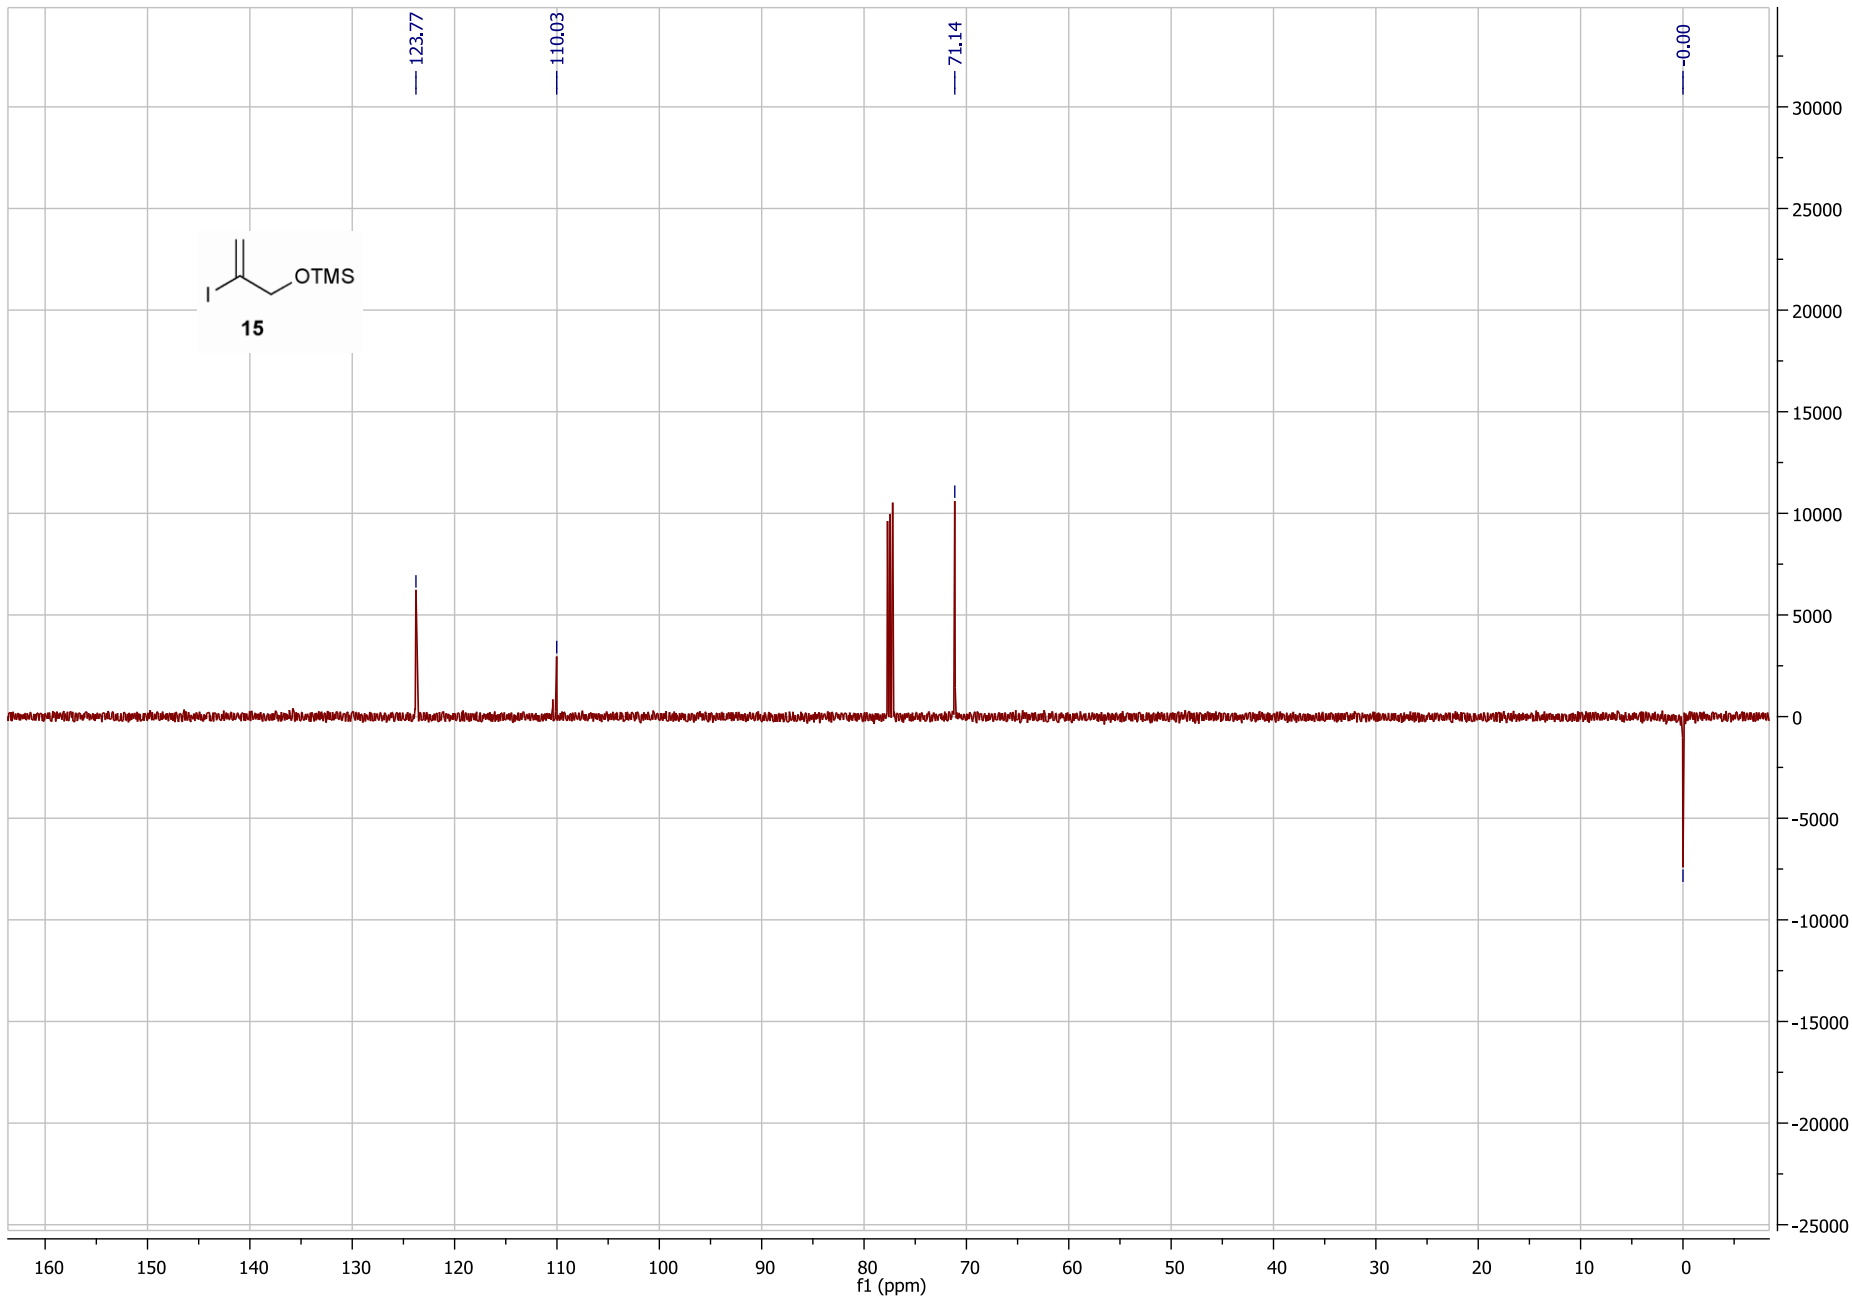

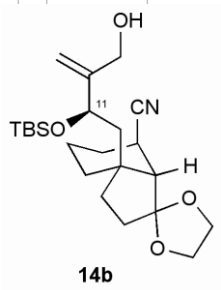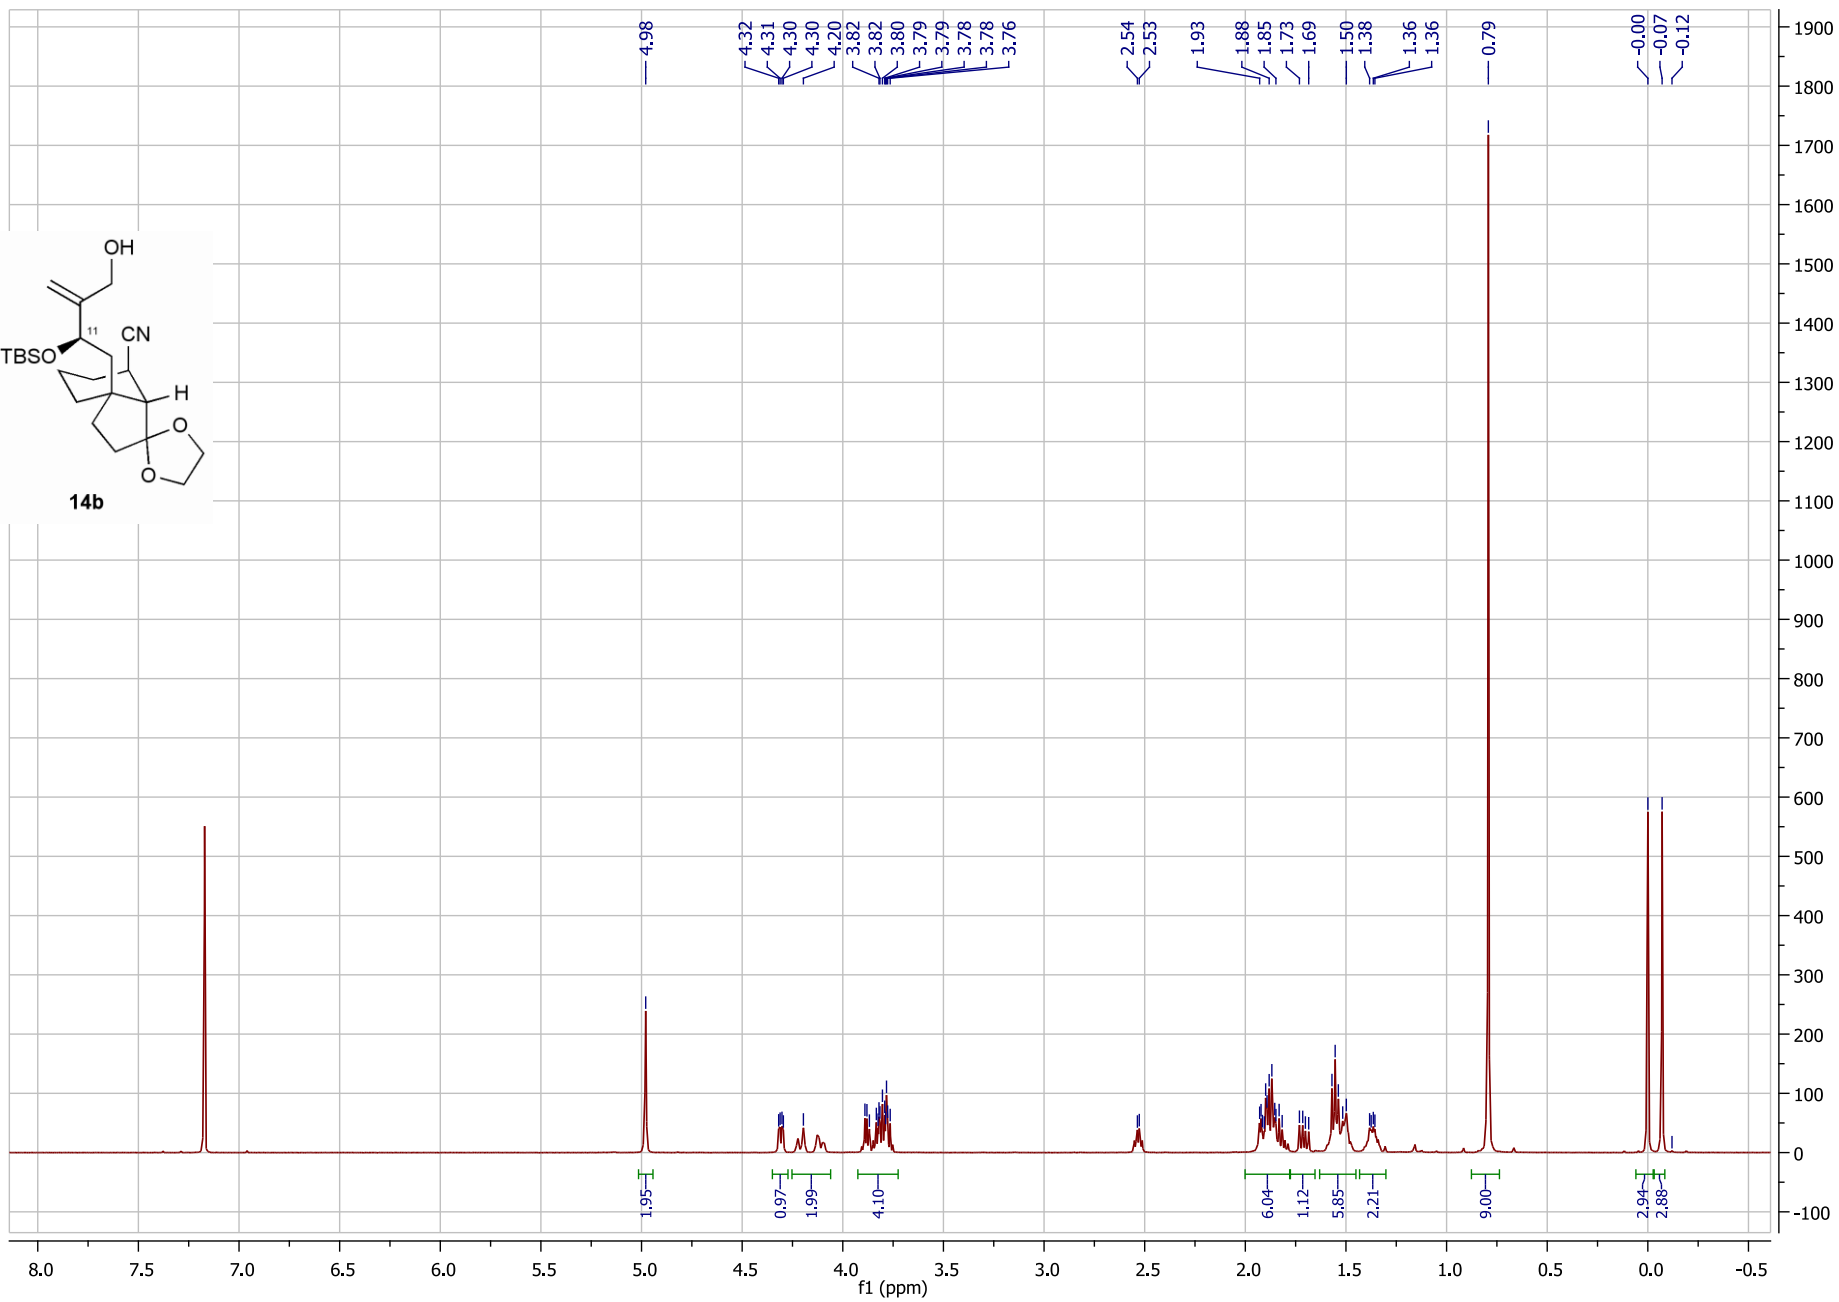

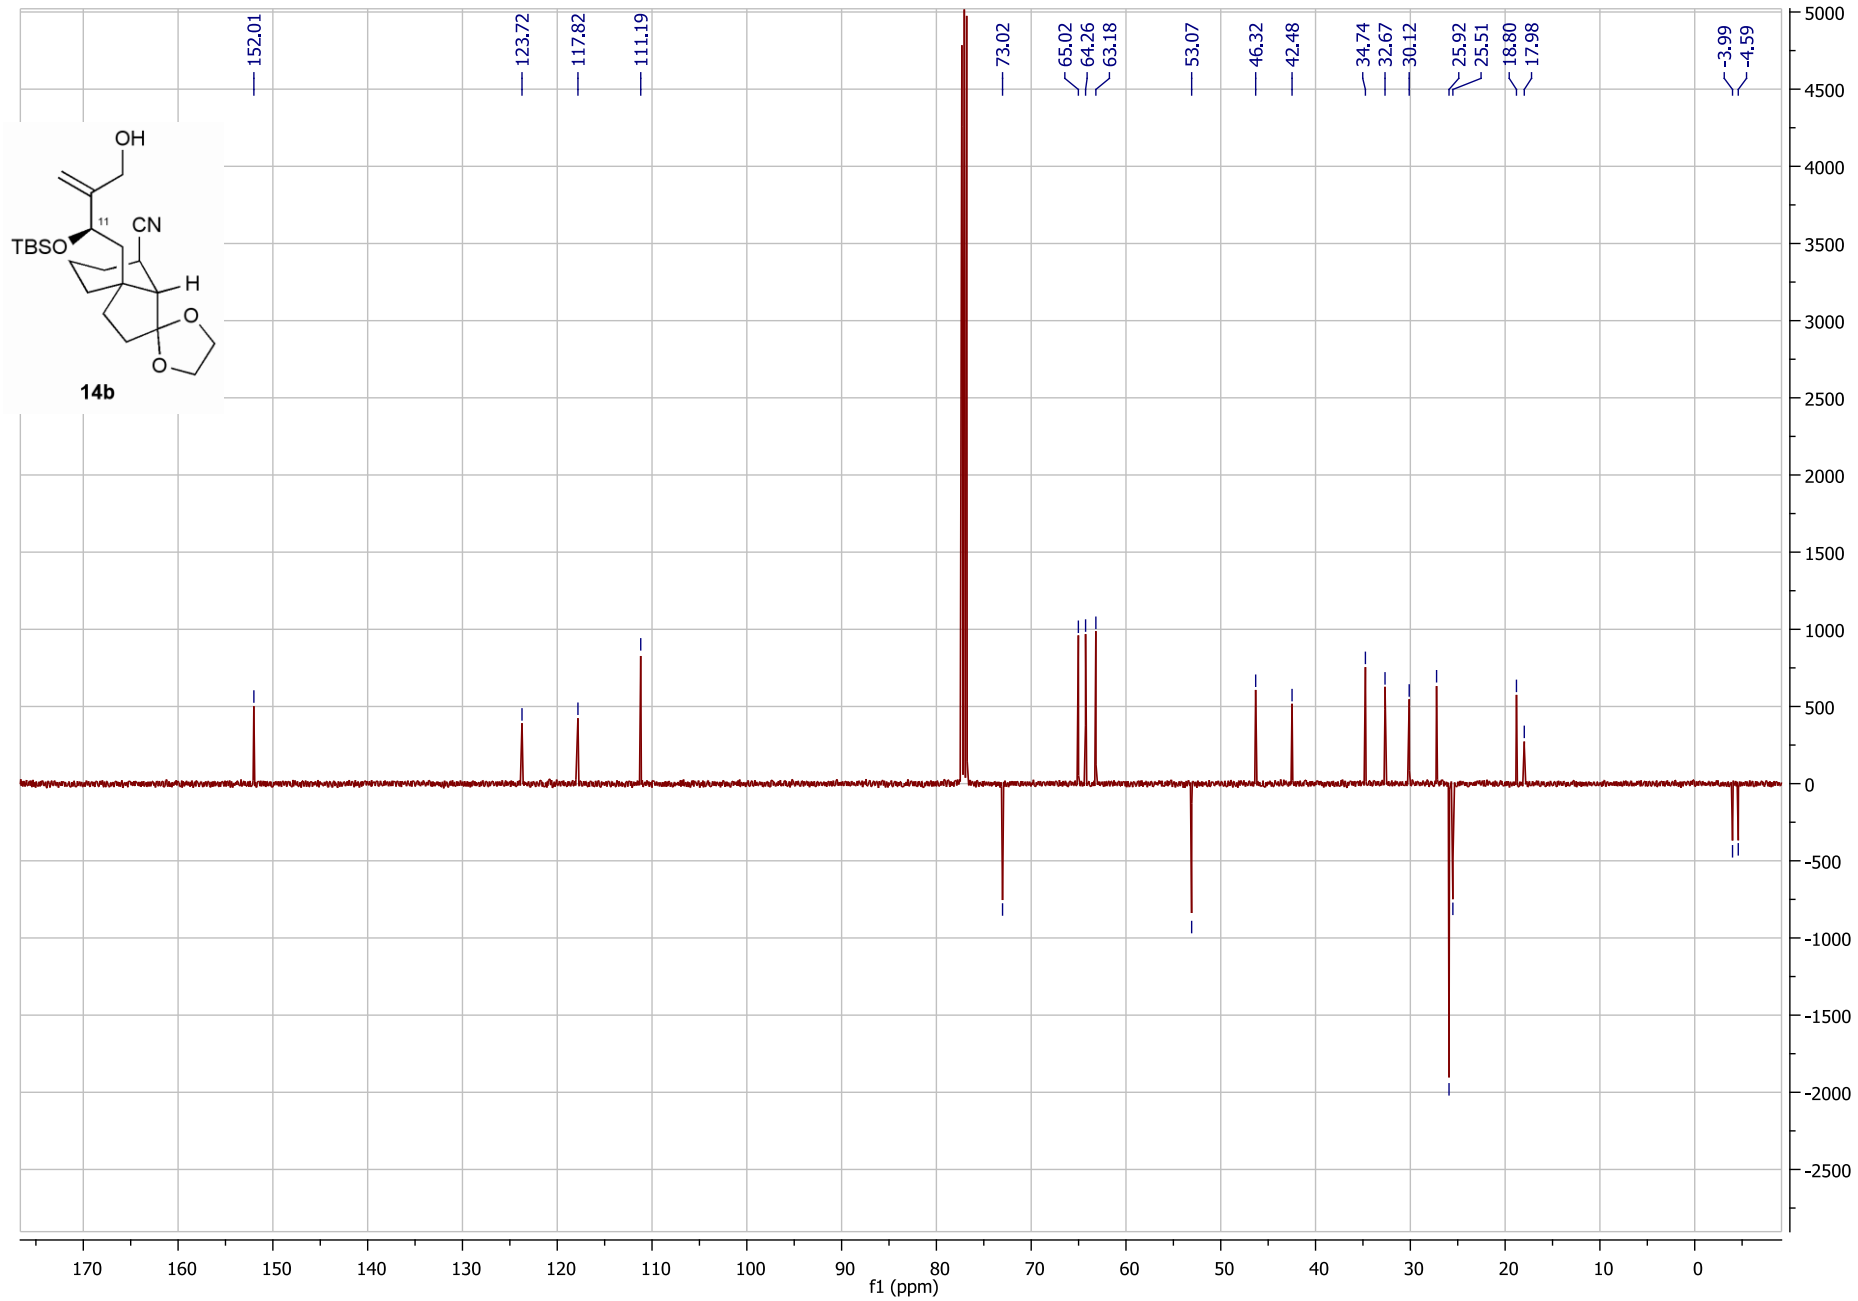

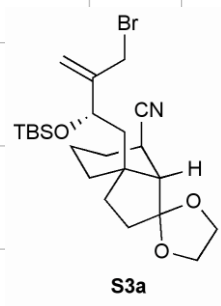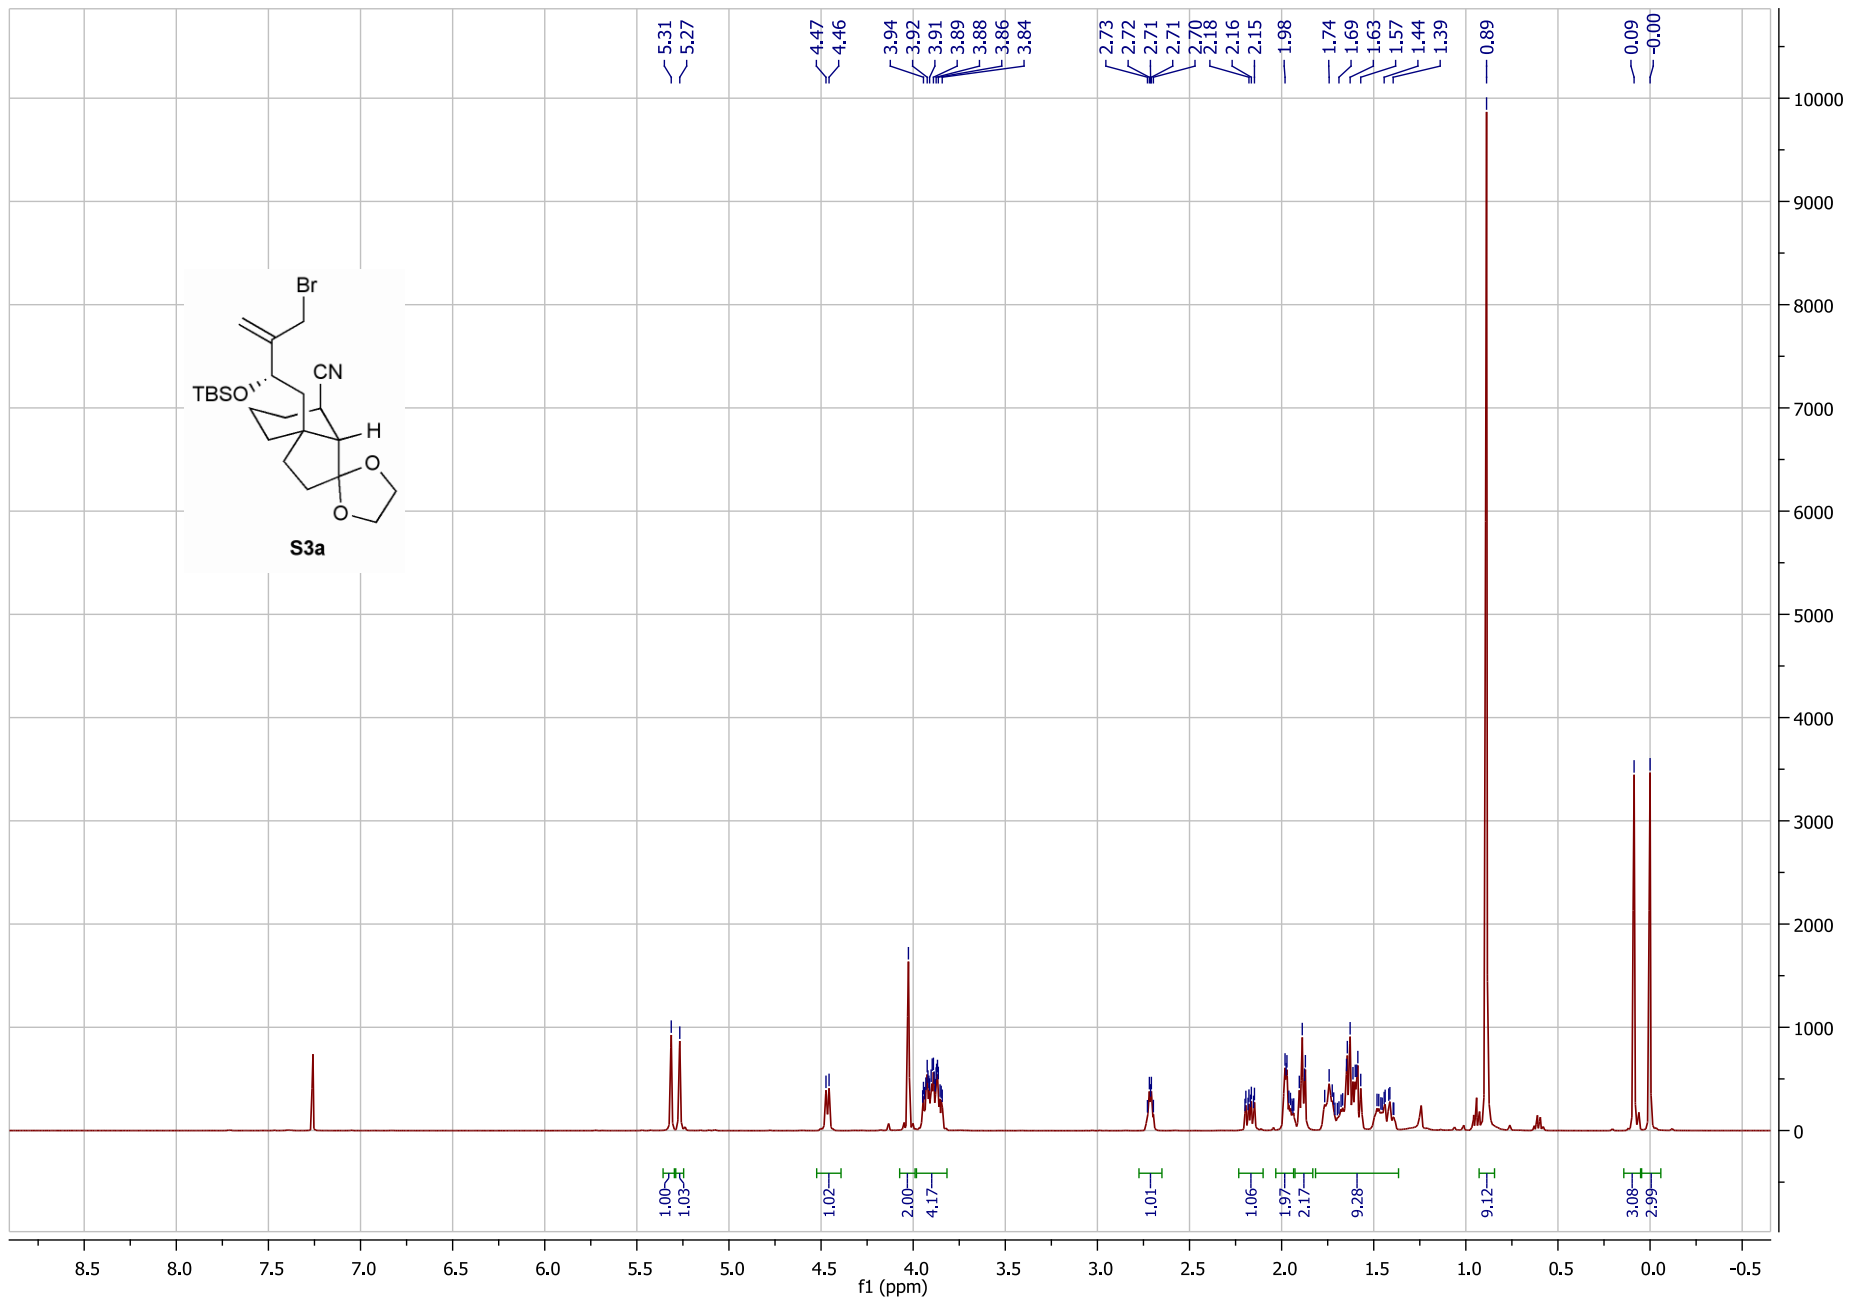

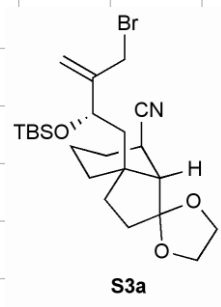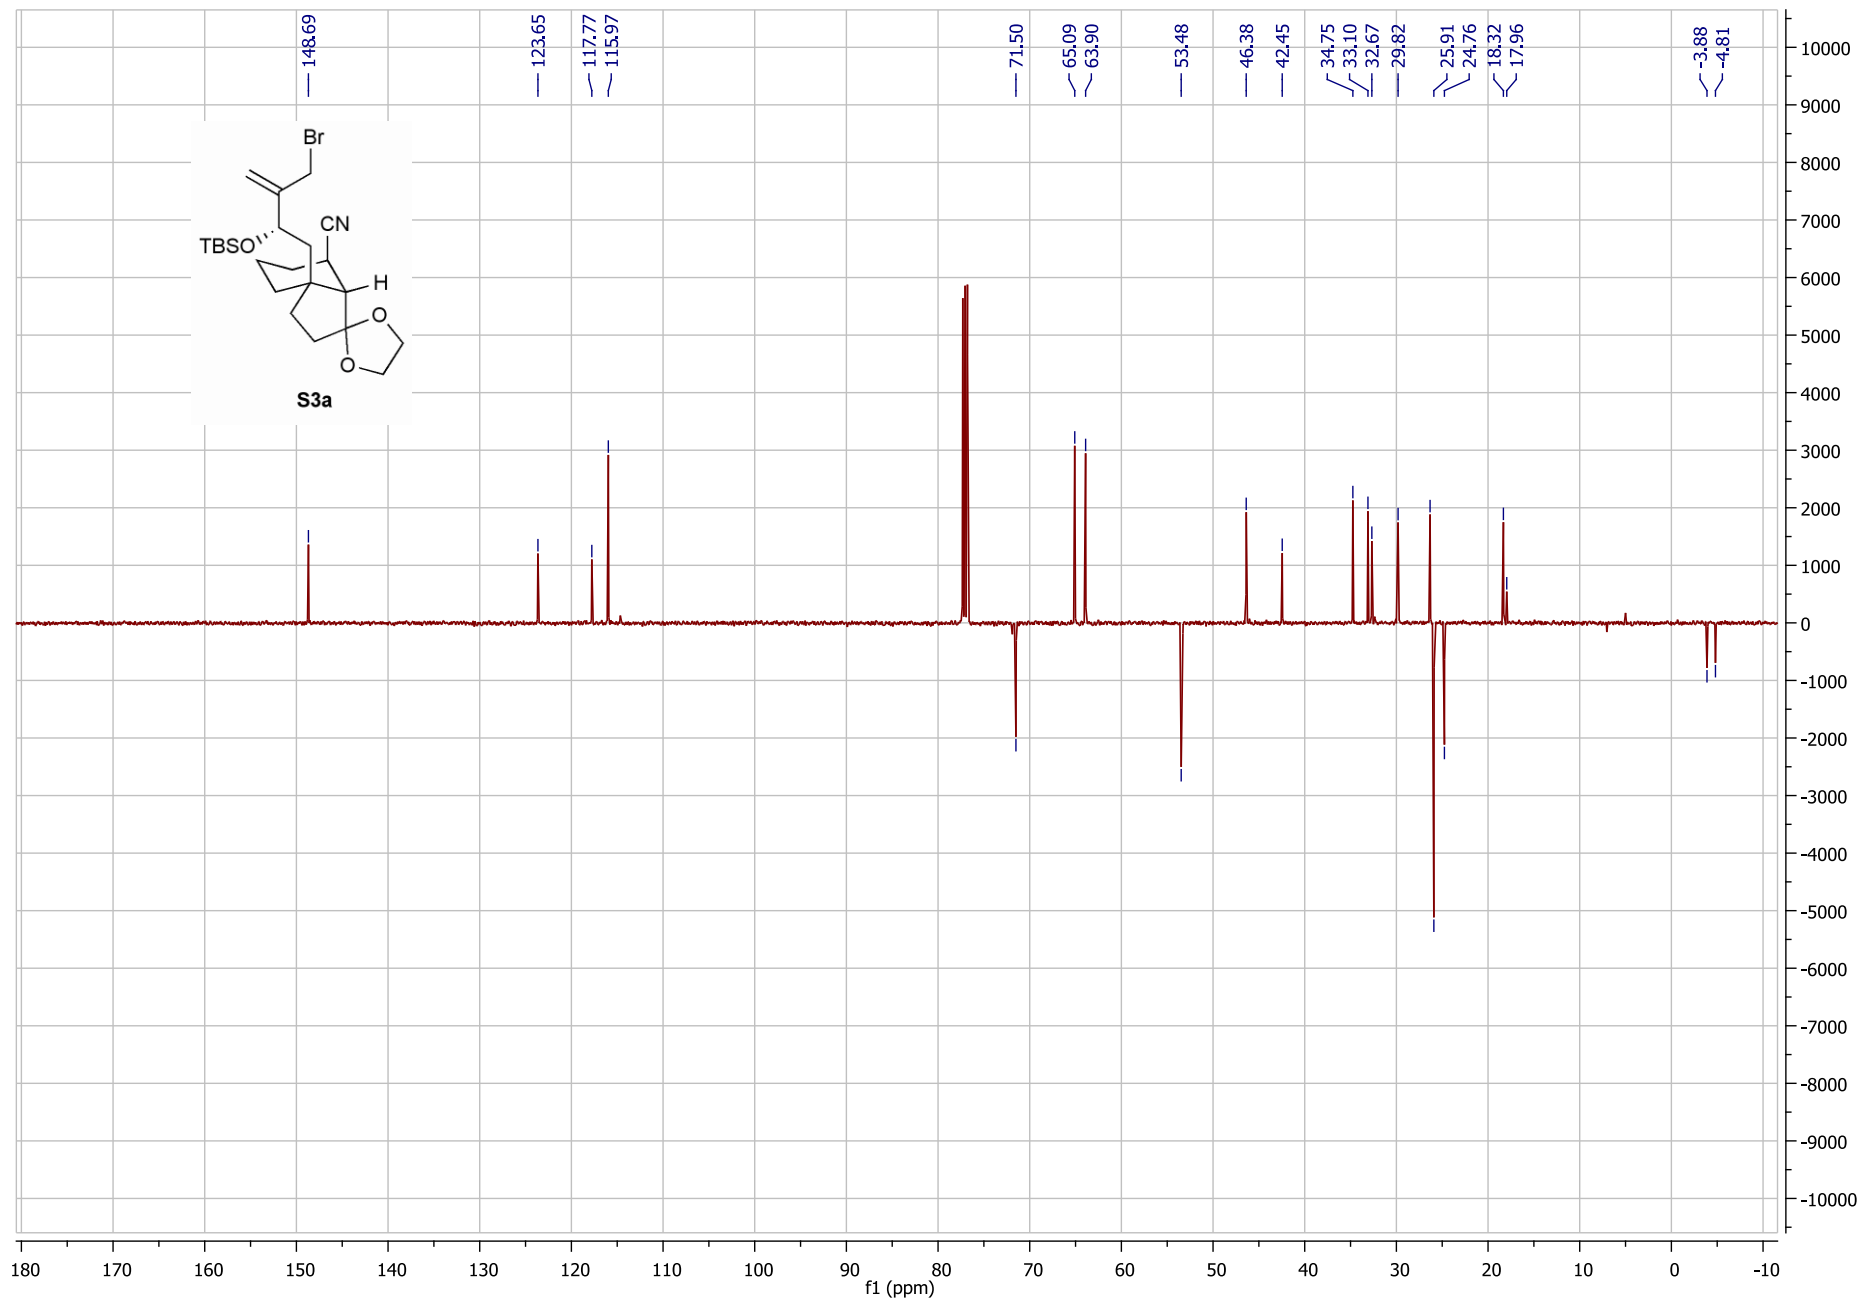

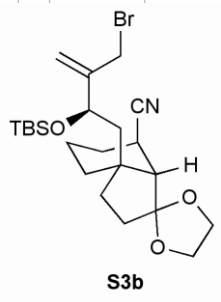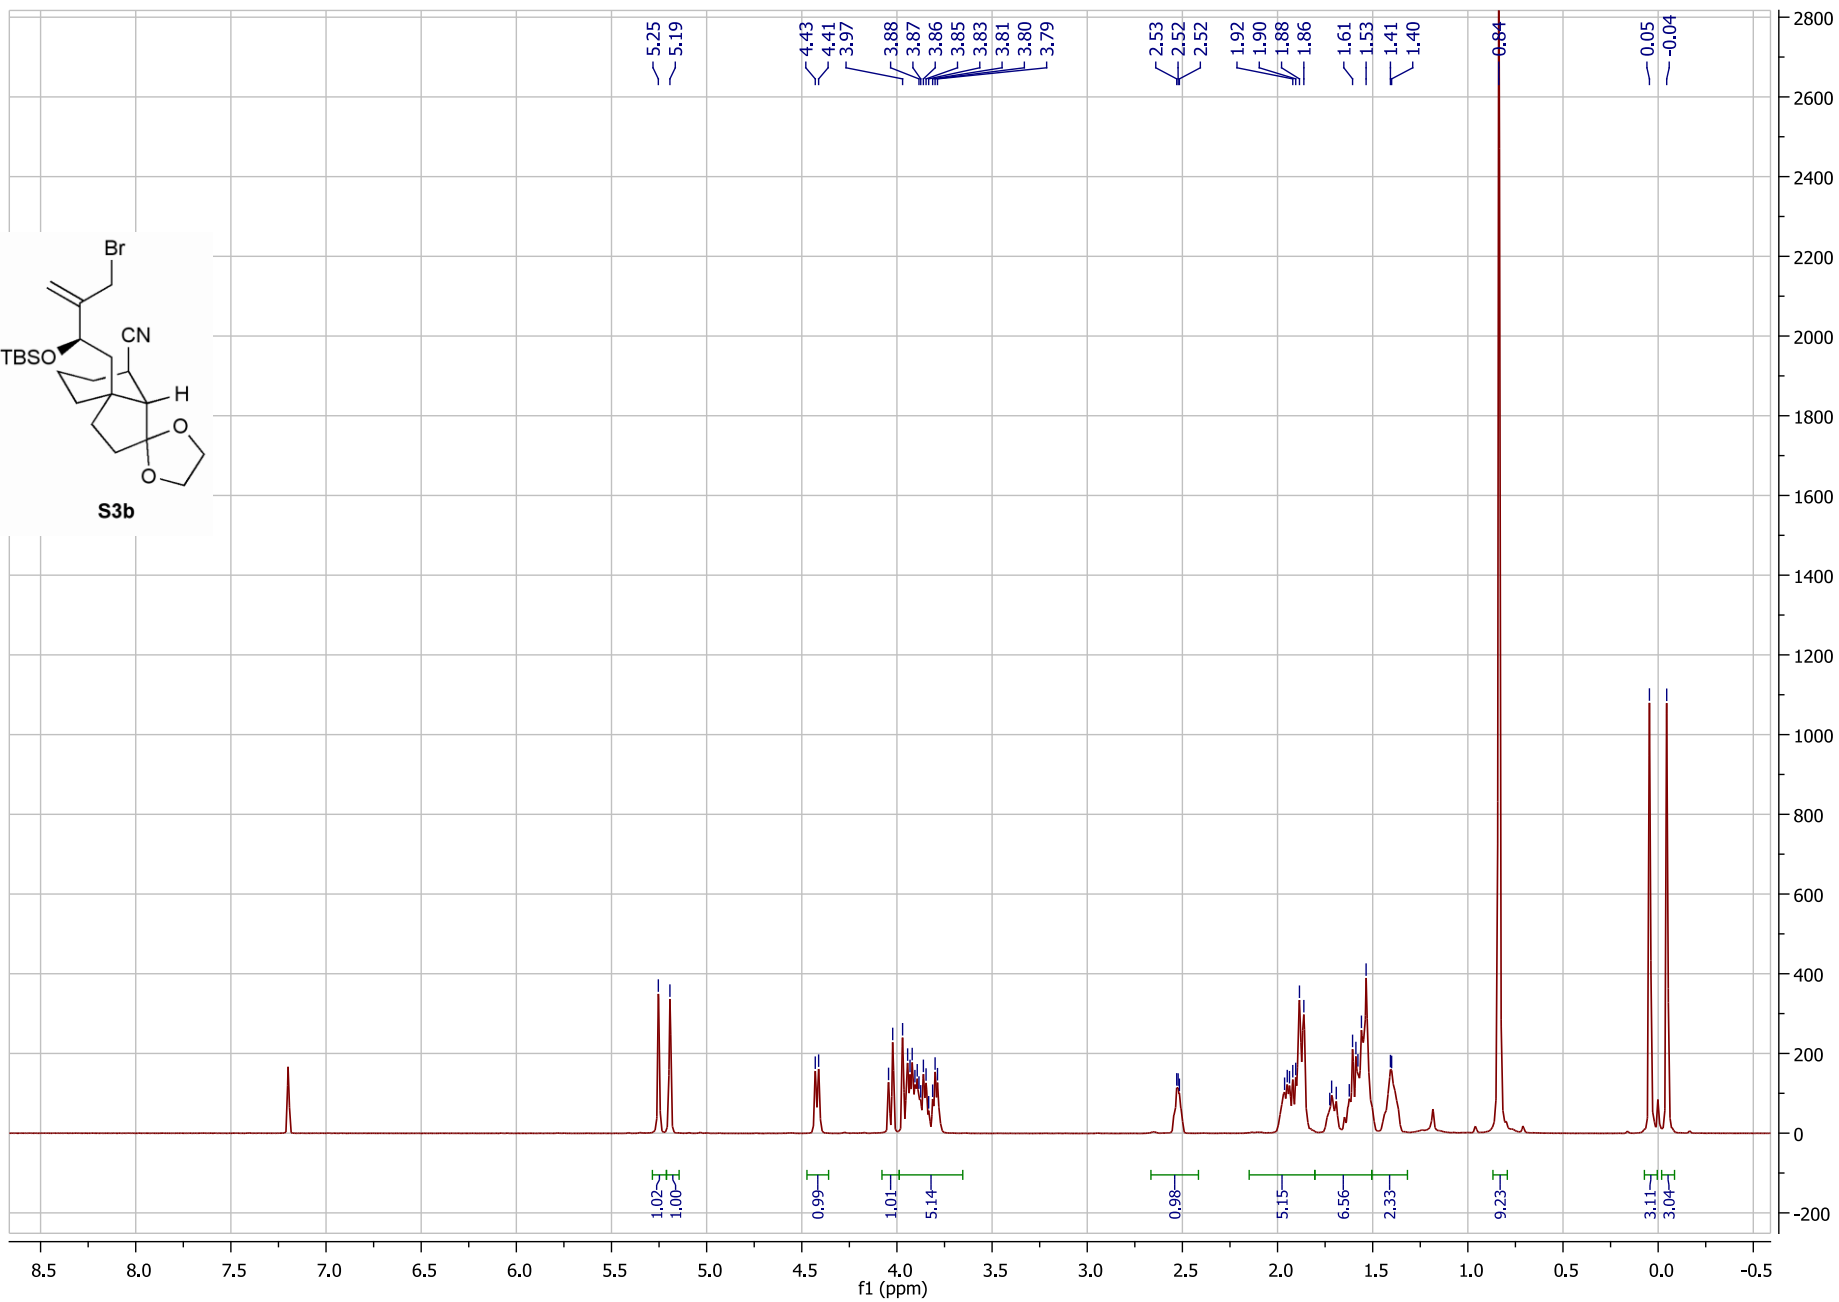

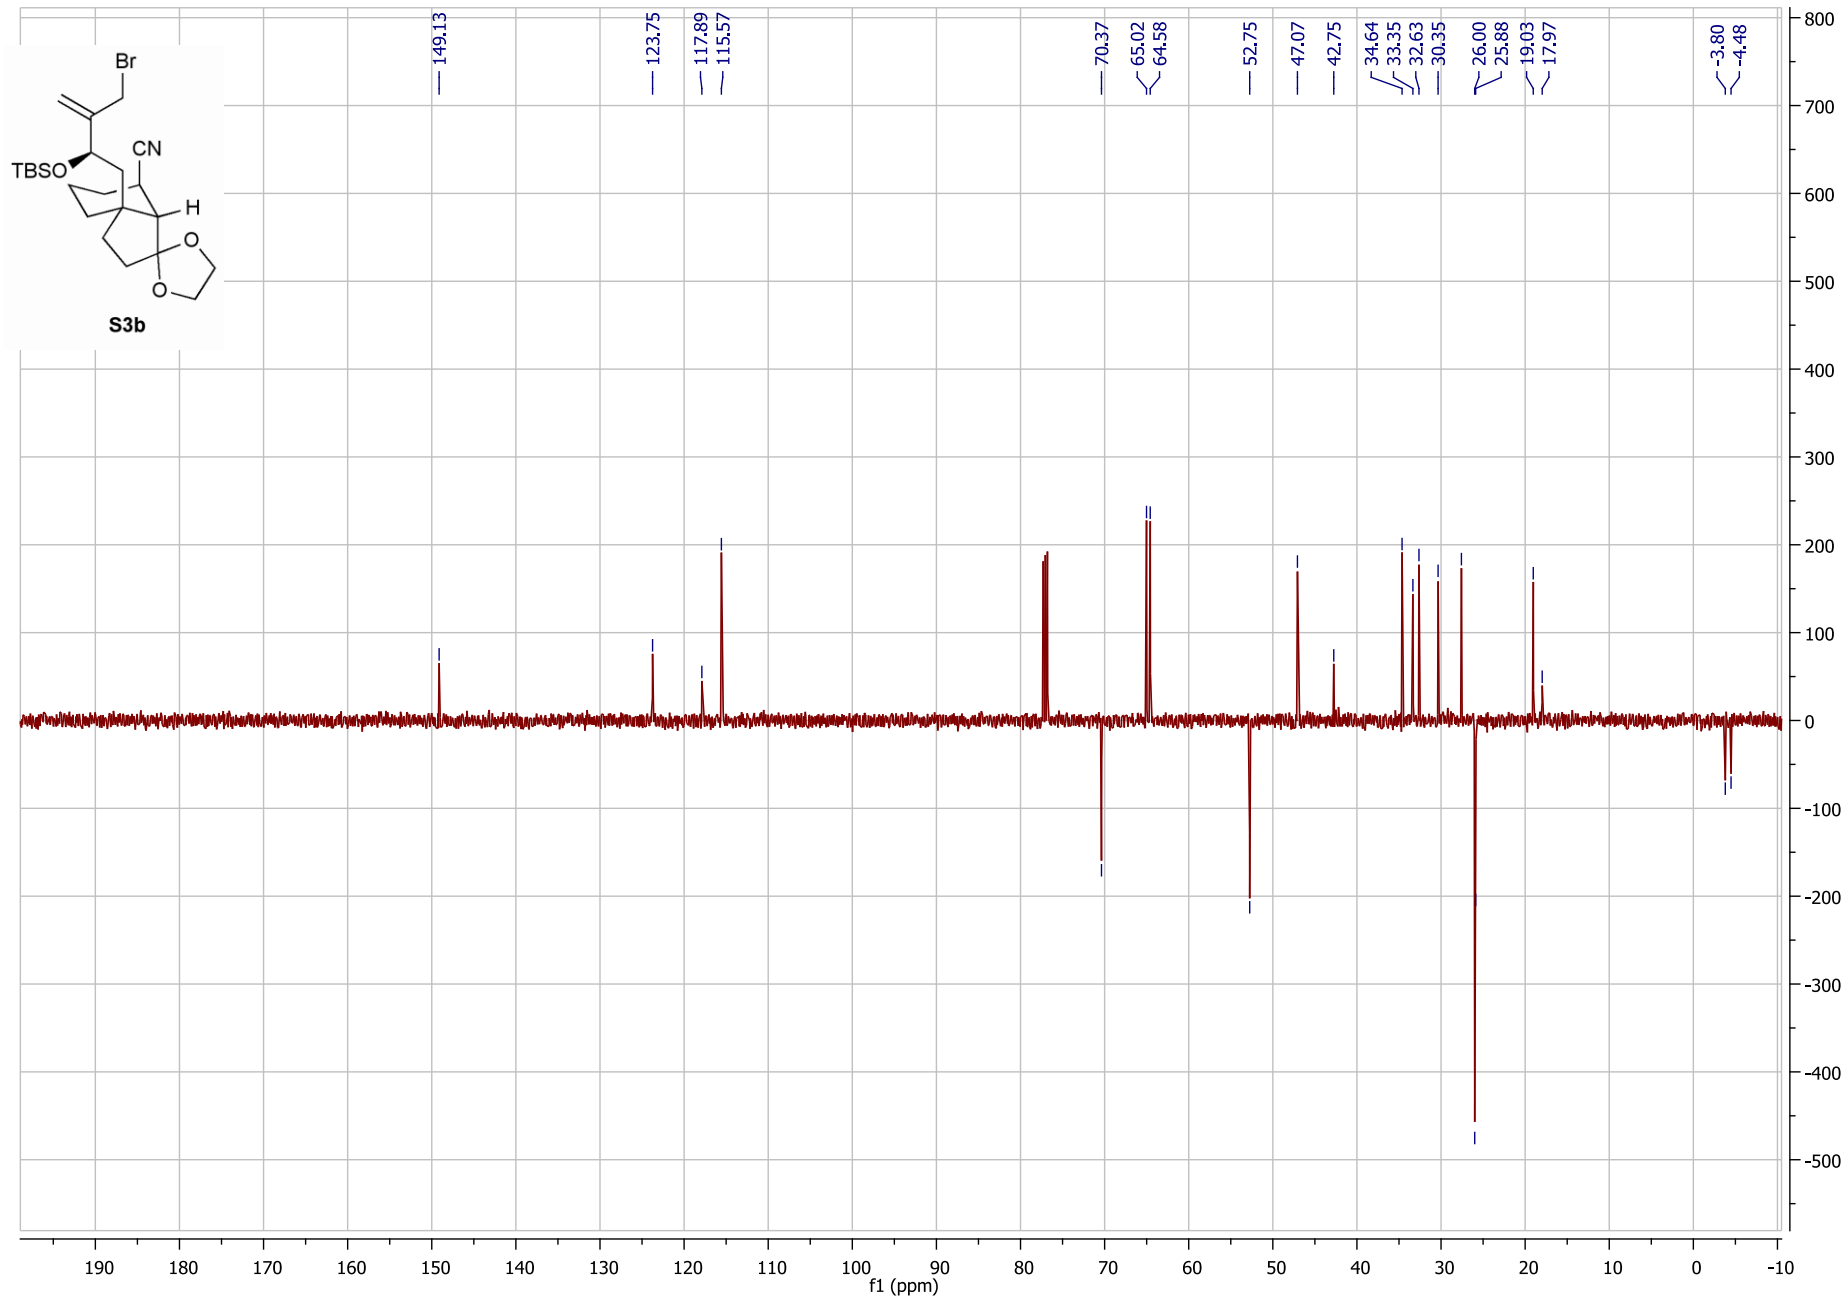



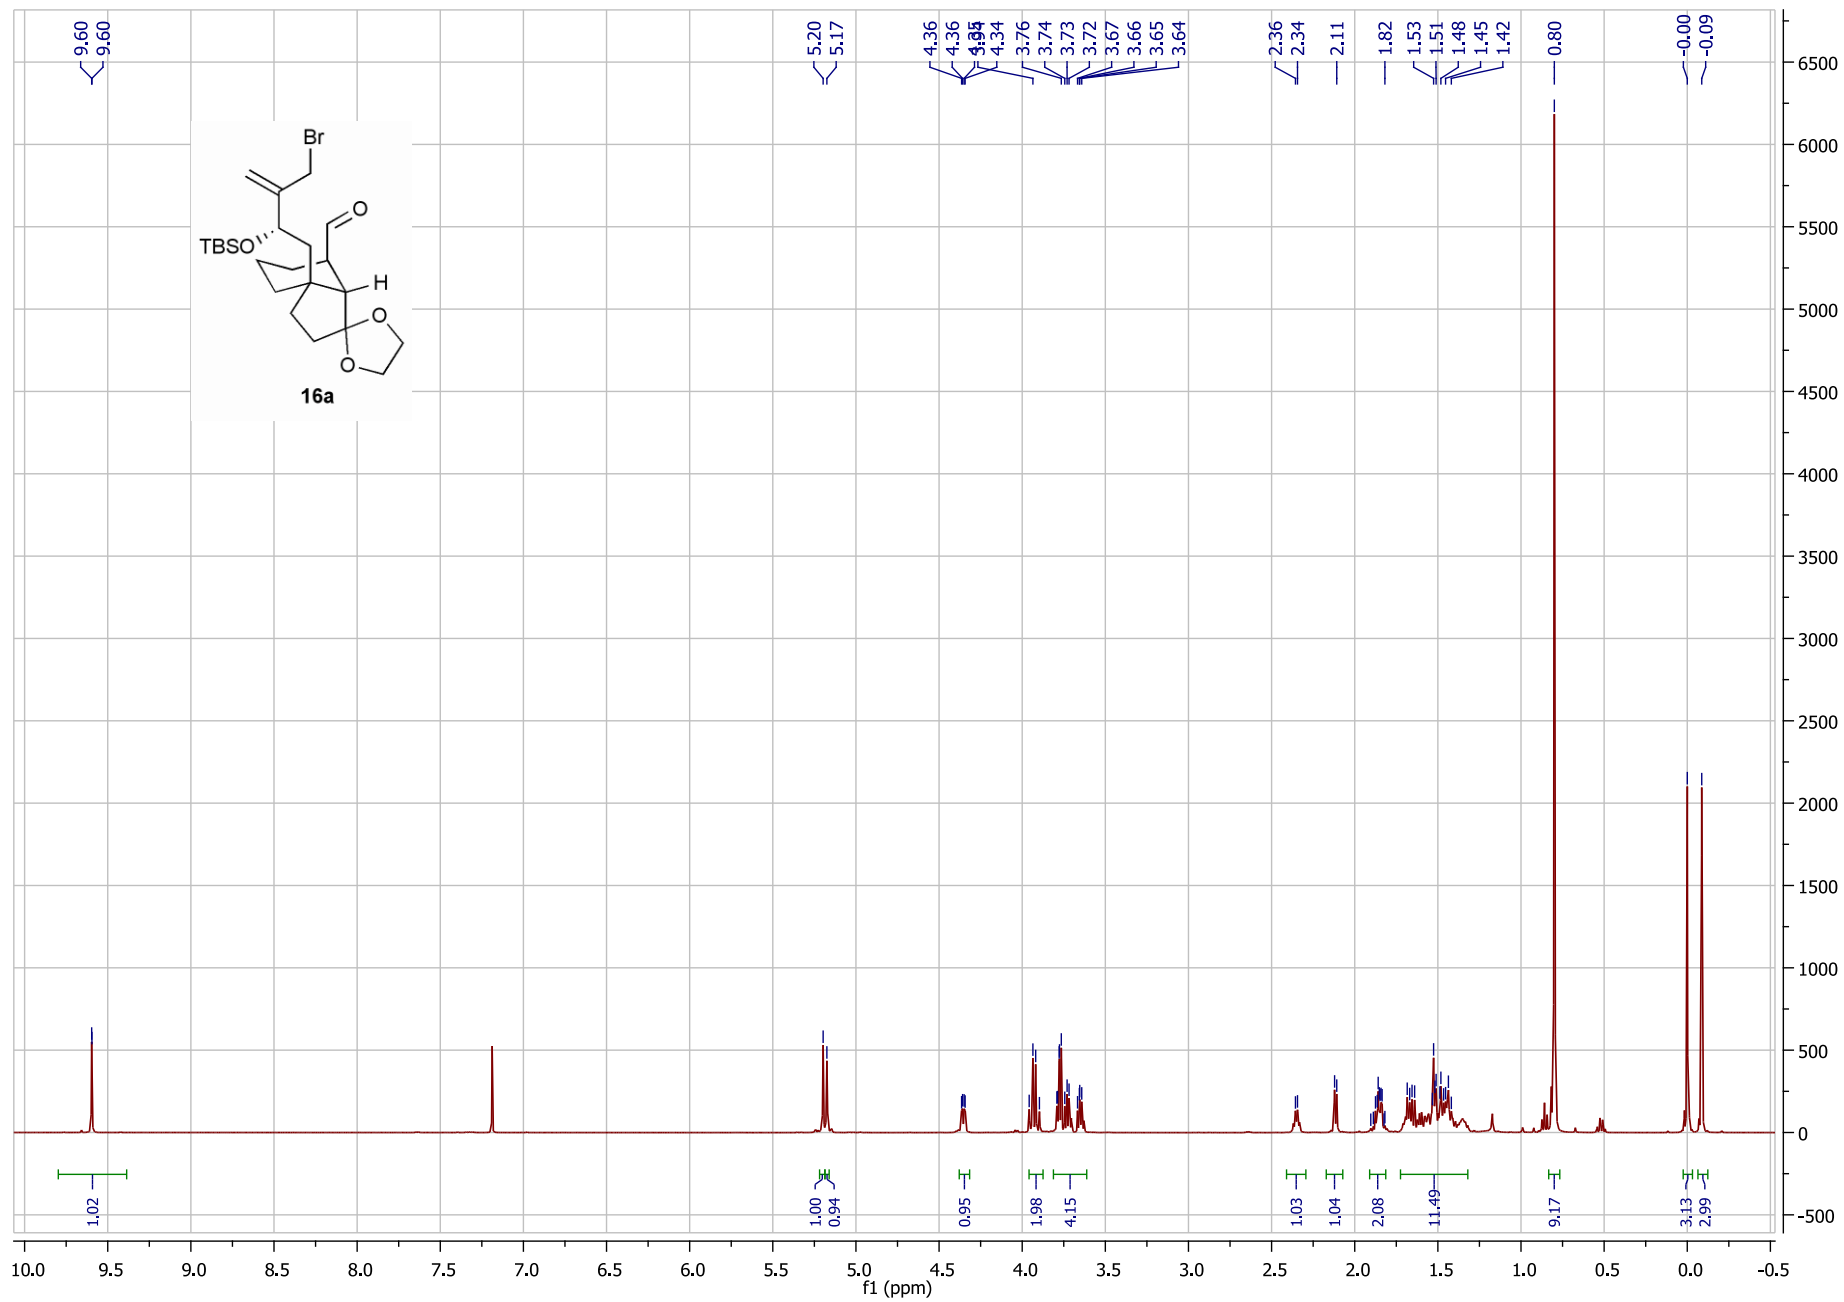

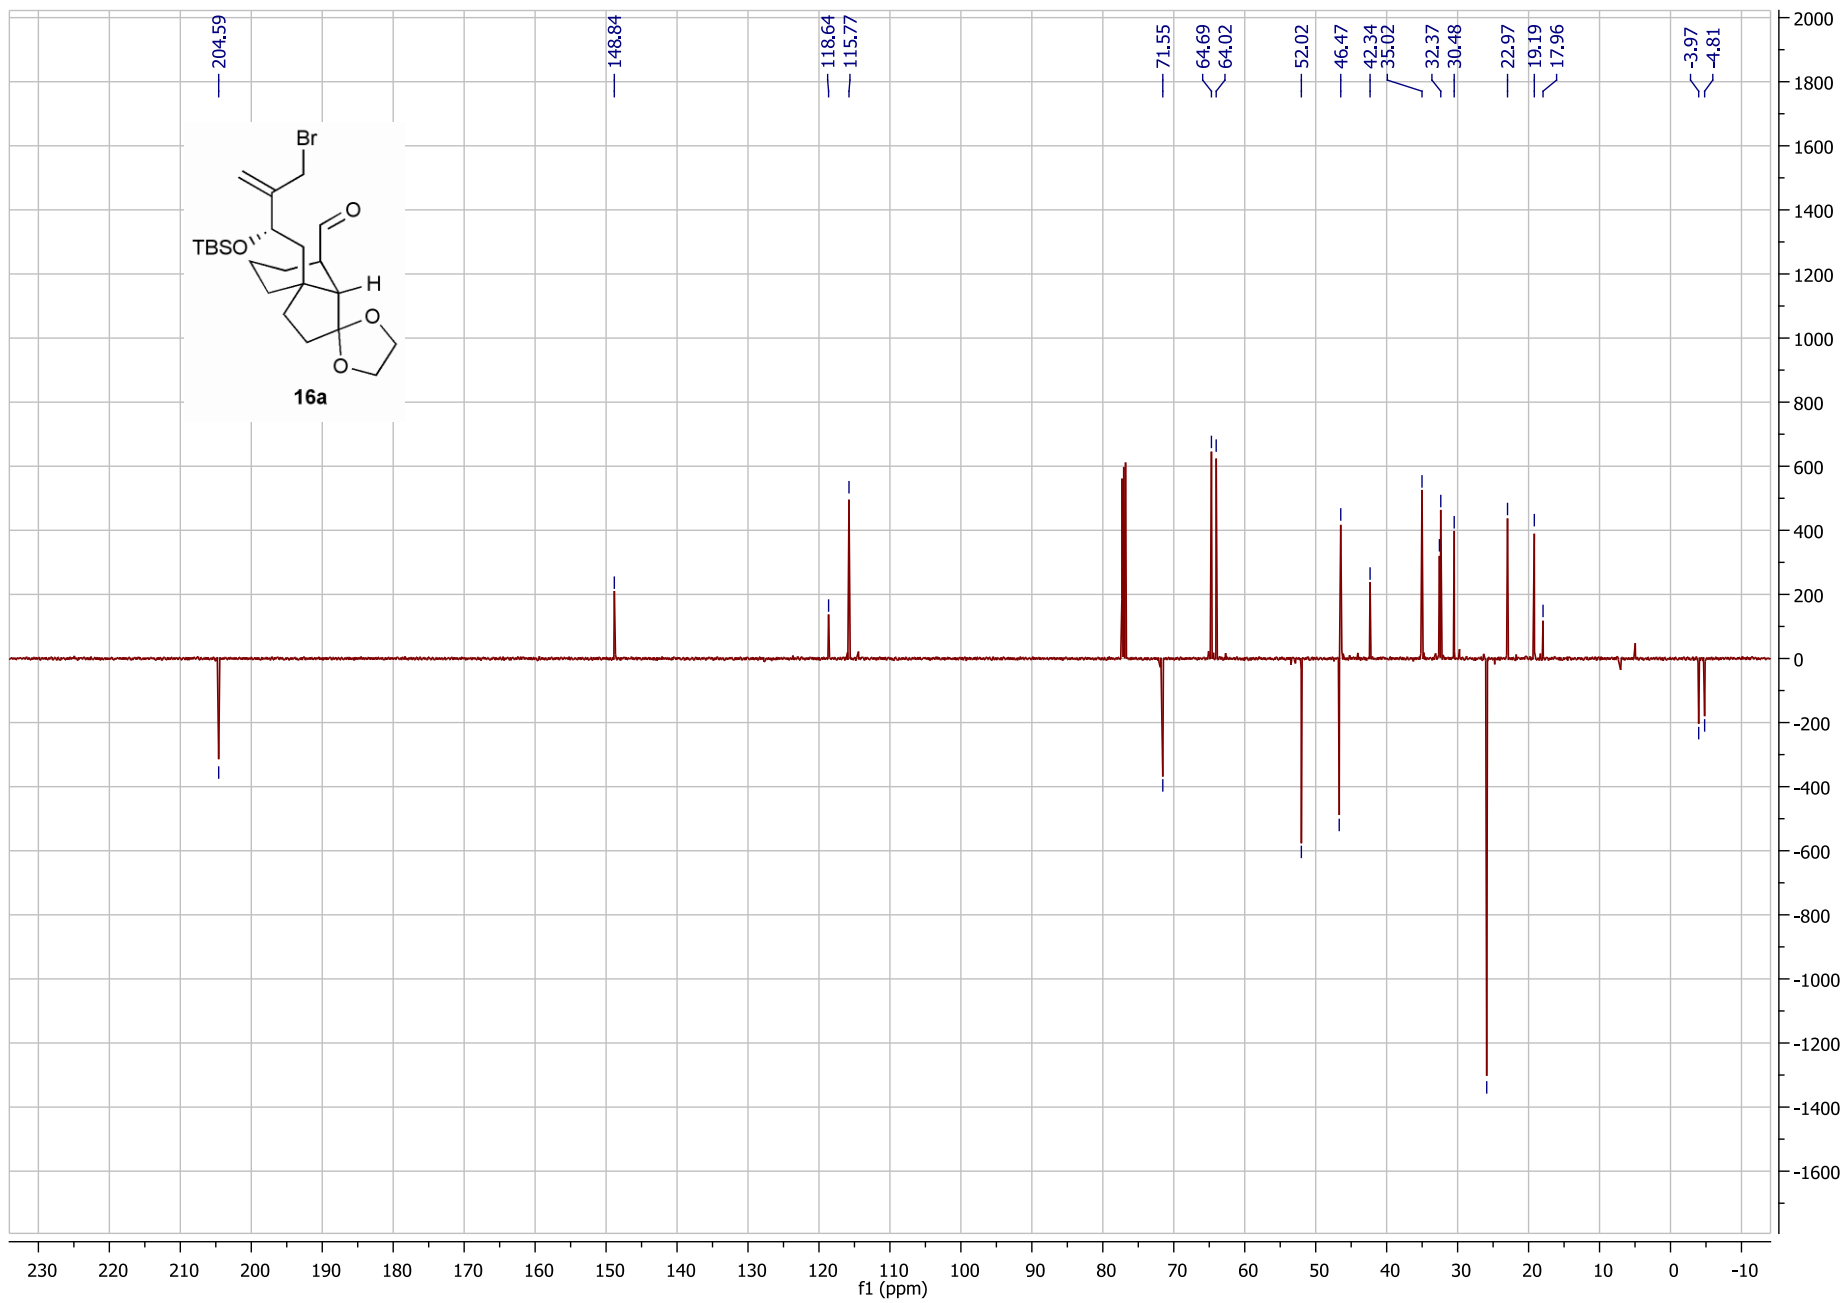

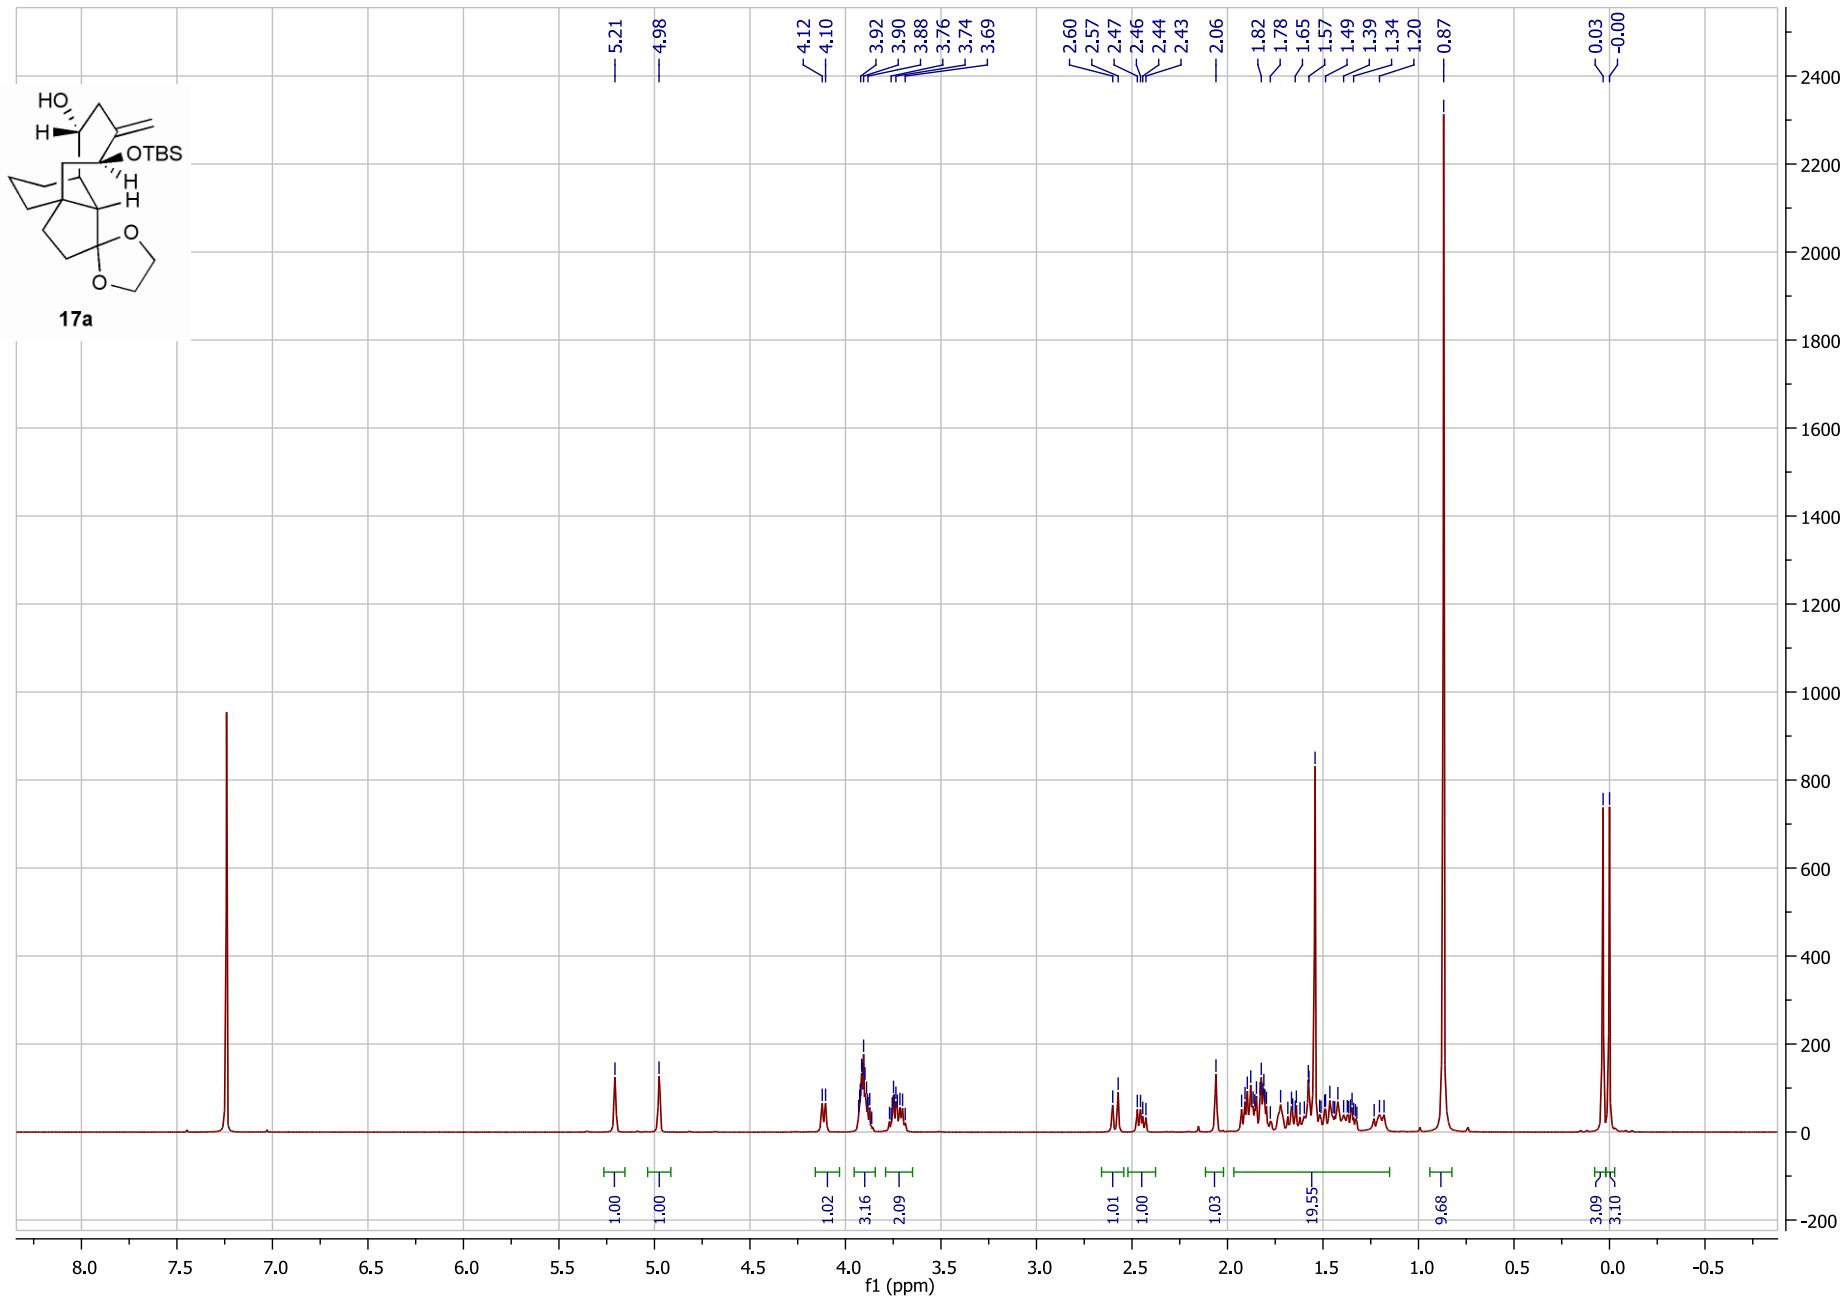

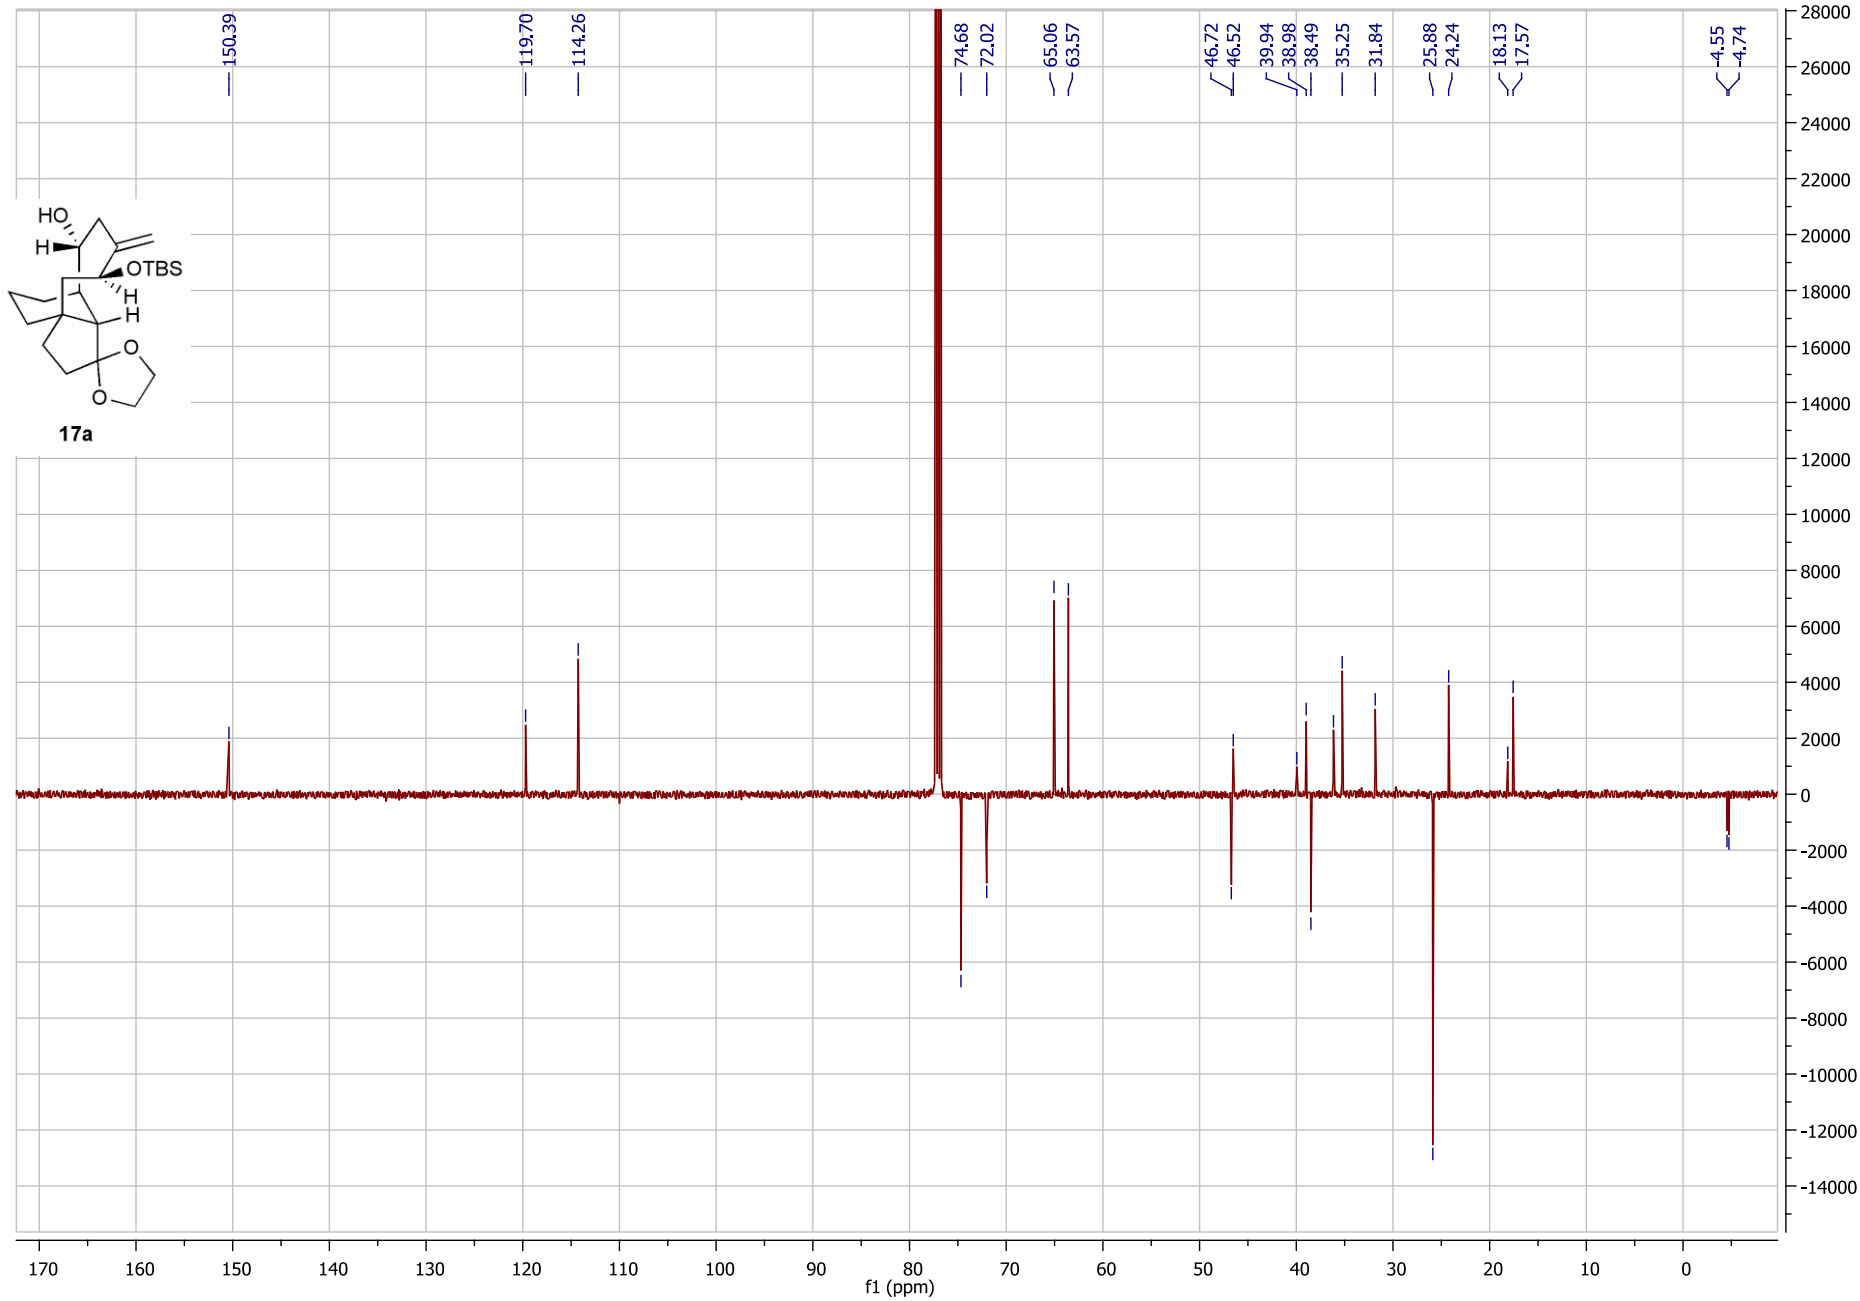

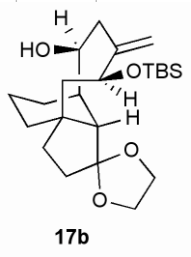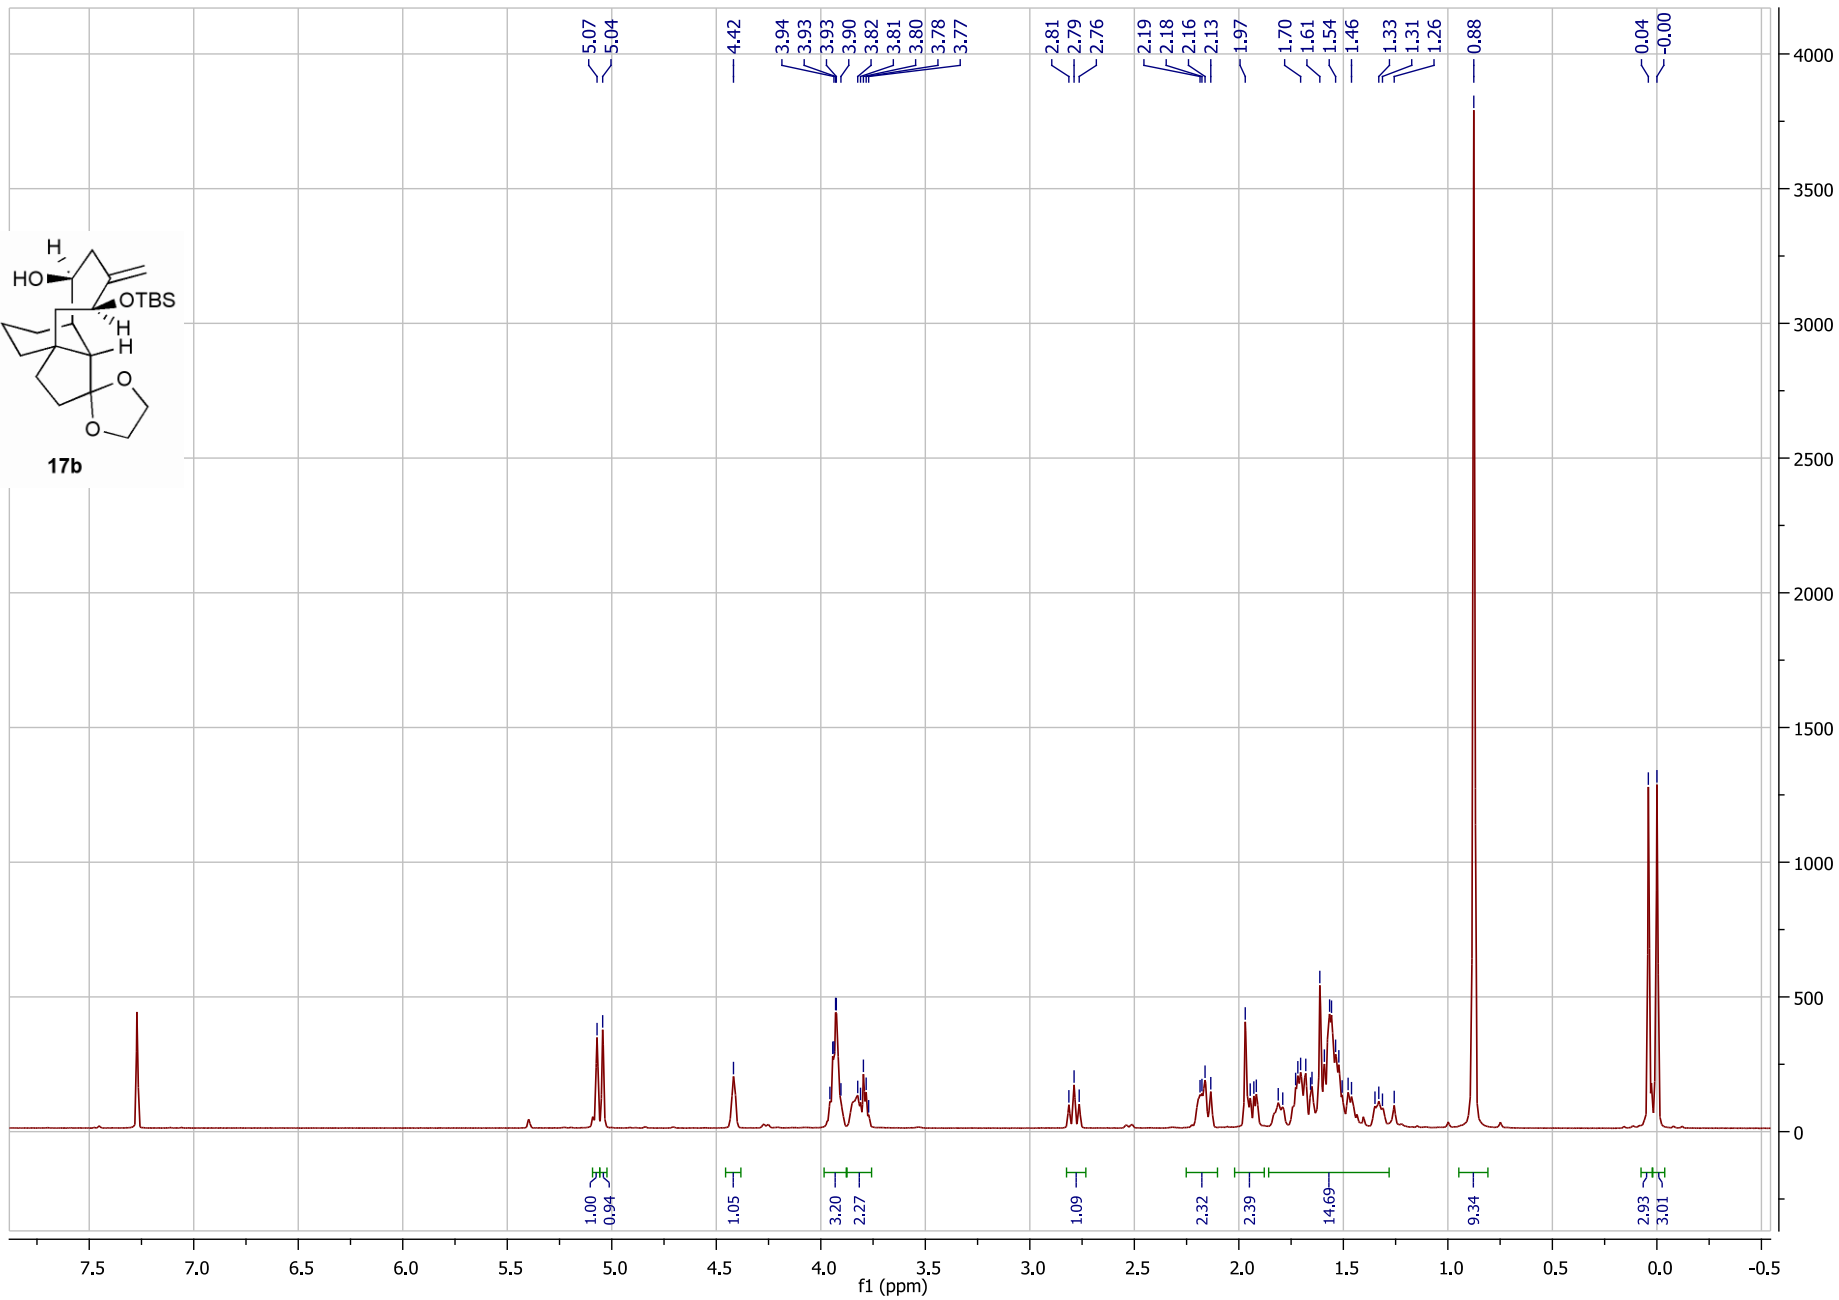

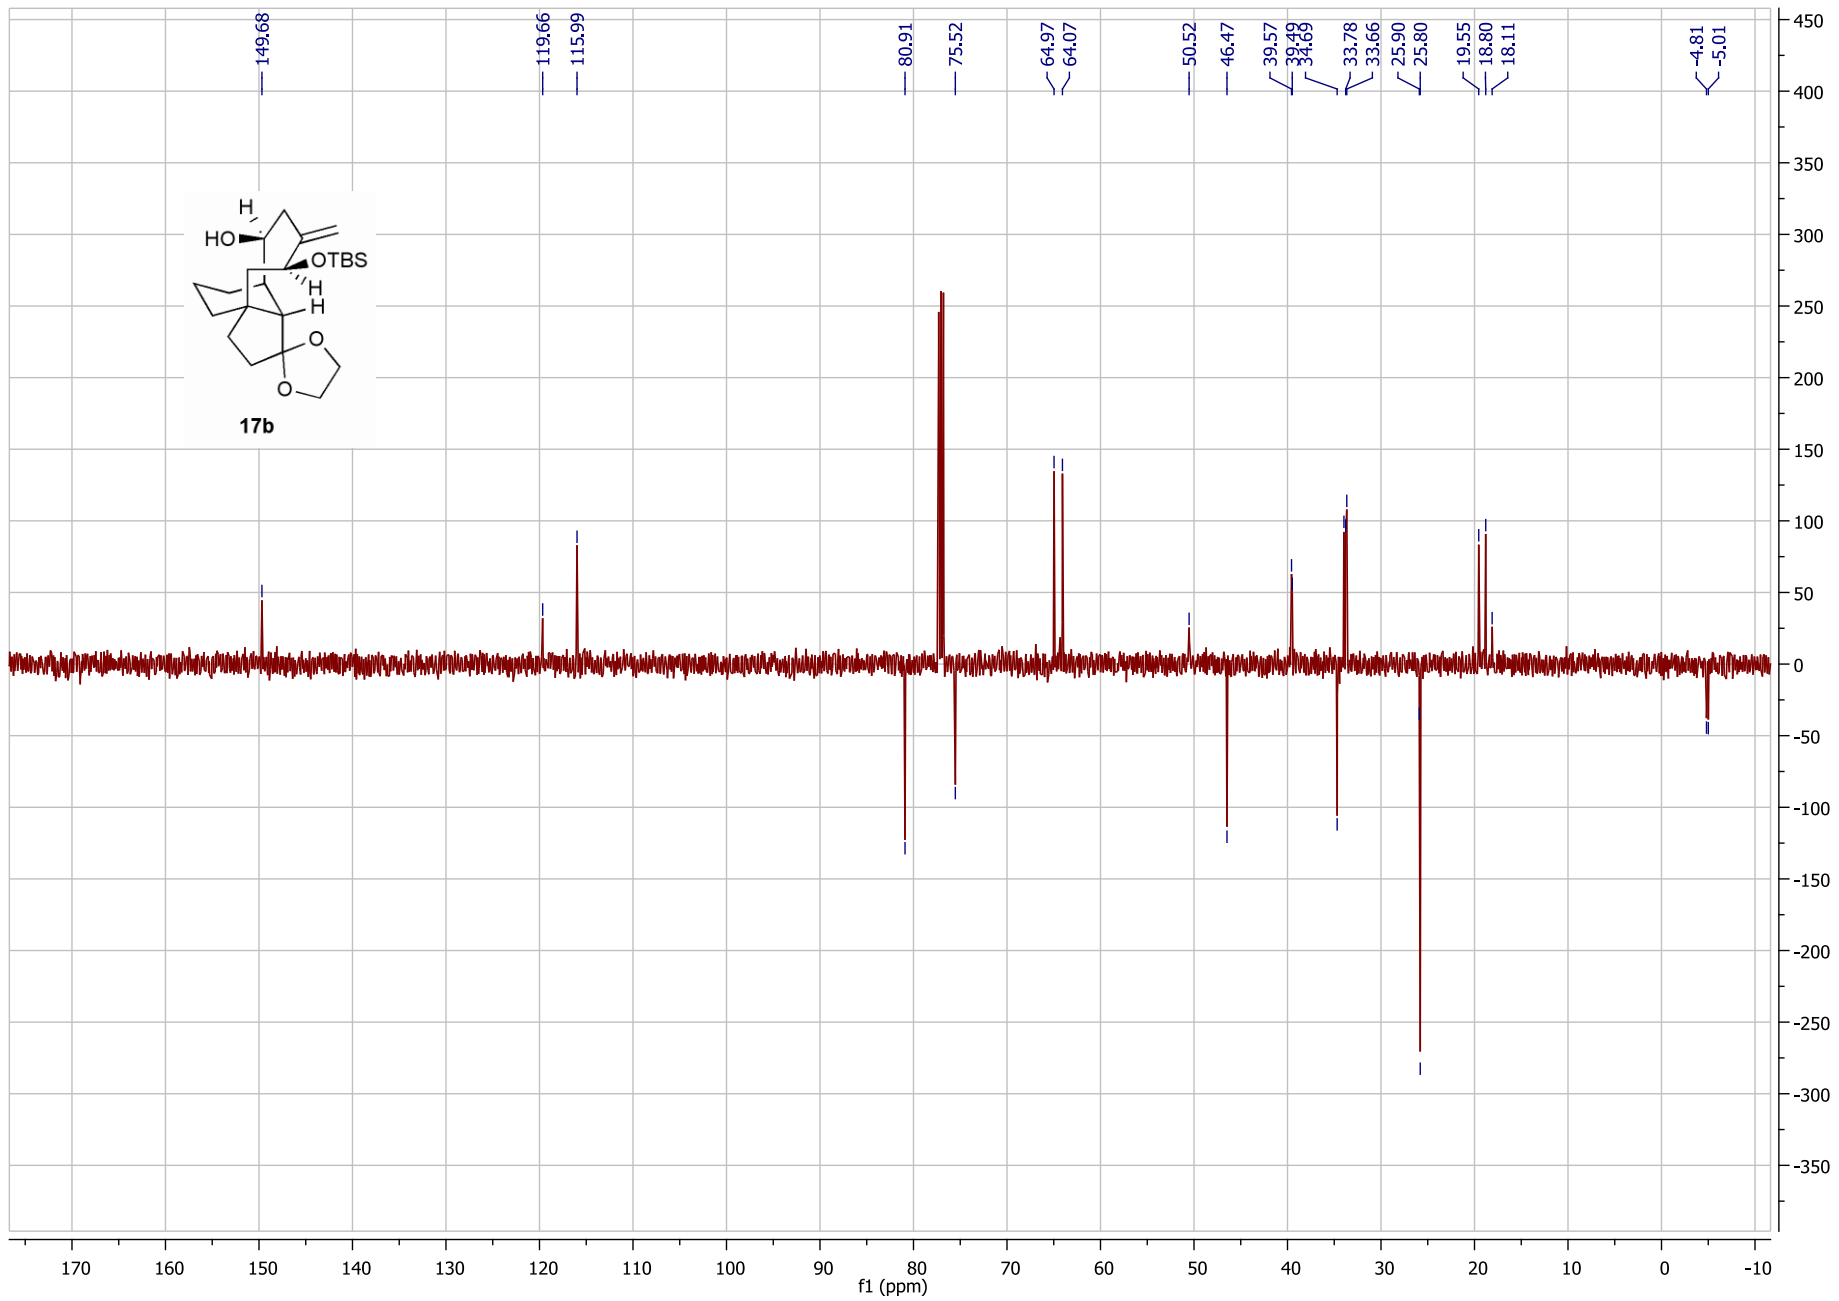

# NOESY analysis of 17a

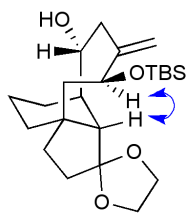

17a

↔ = nOe

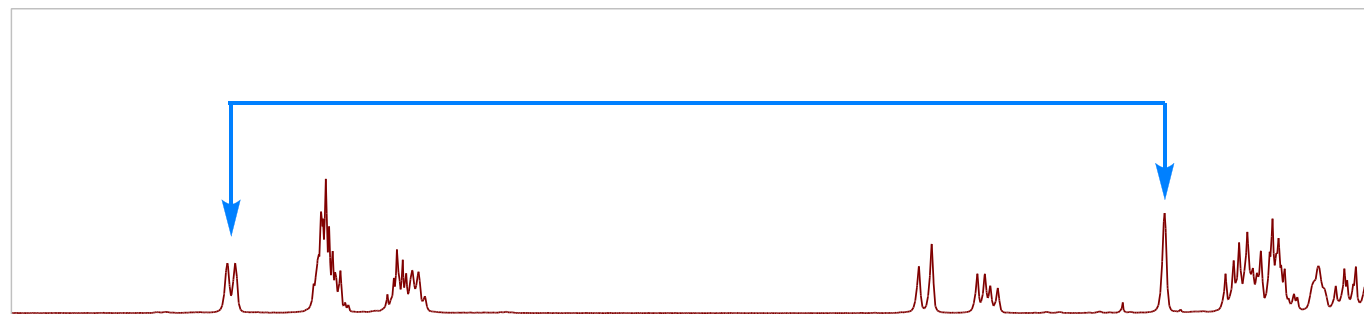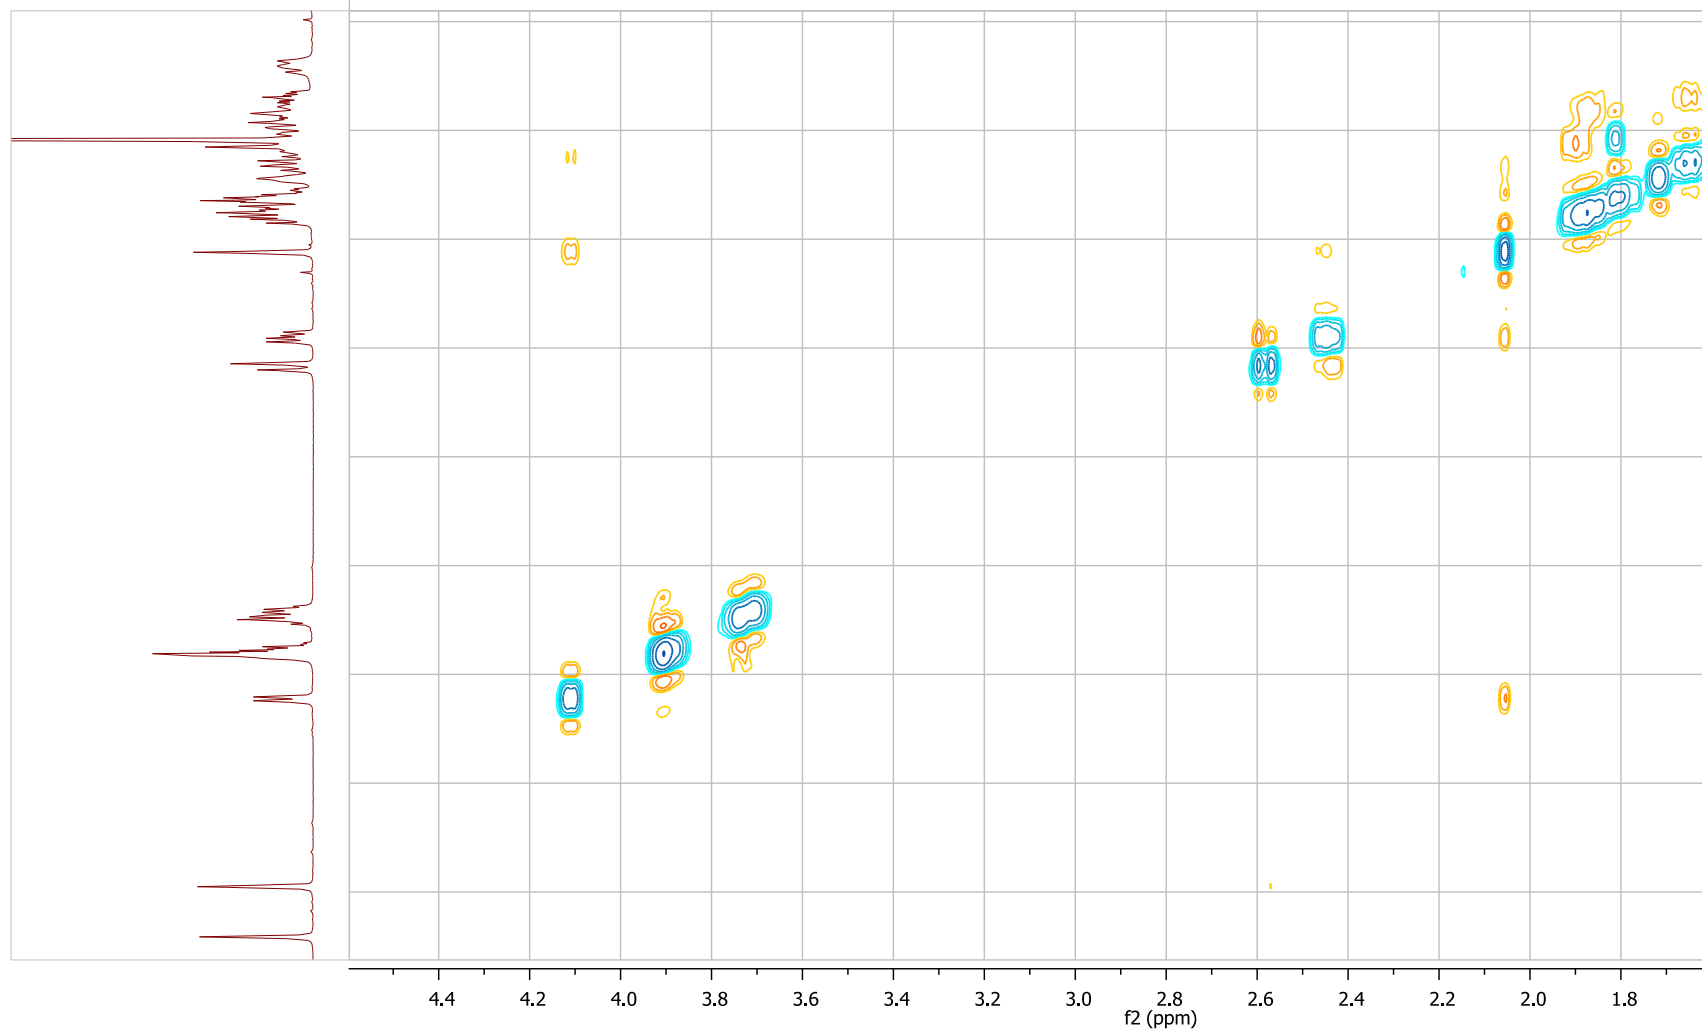

# NOESY analysis of 17b

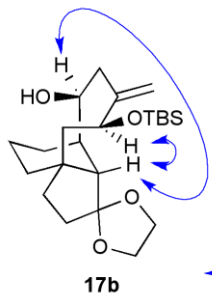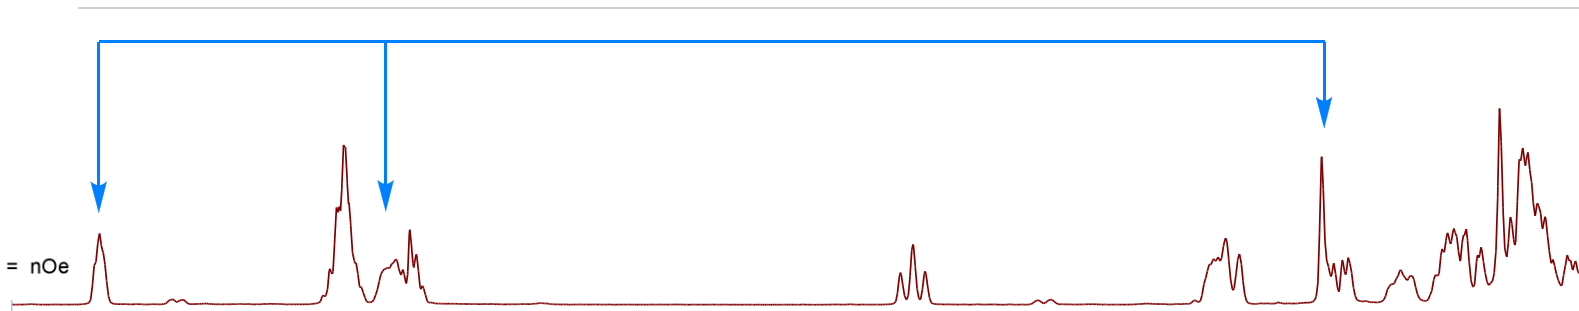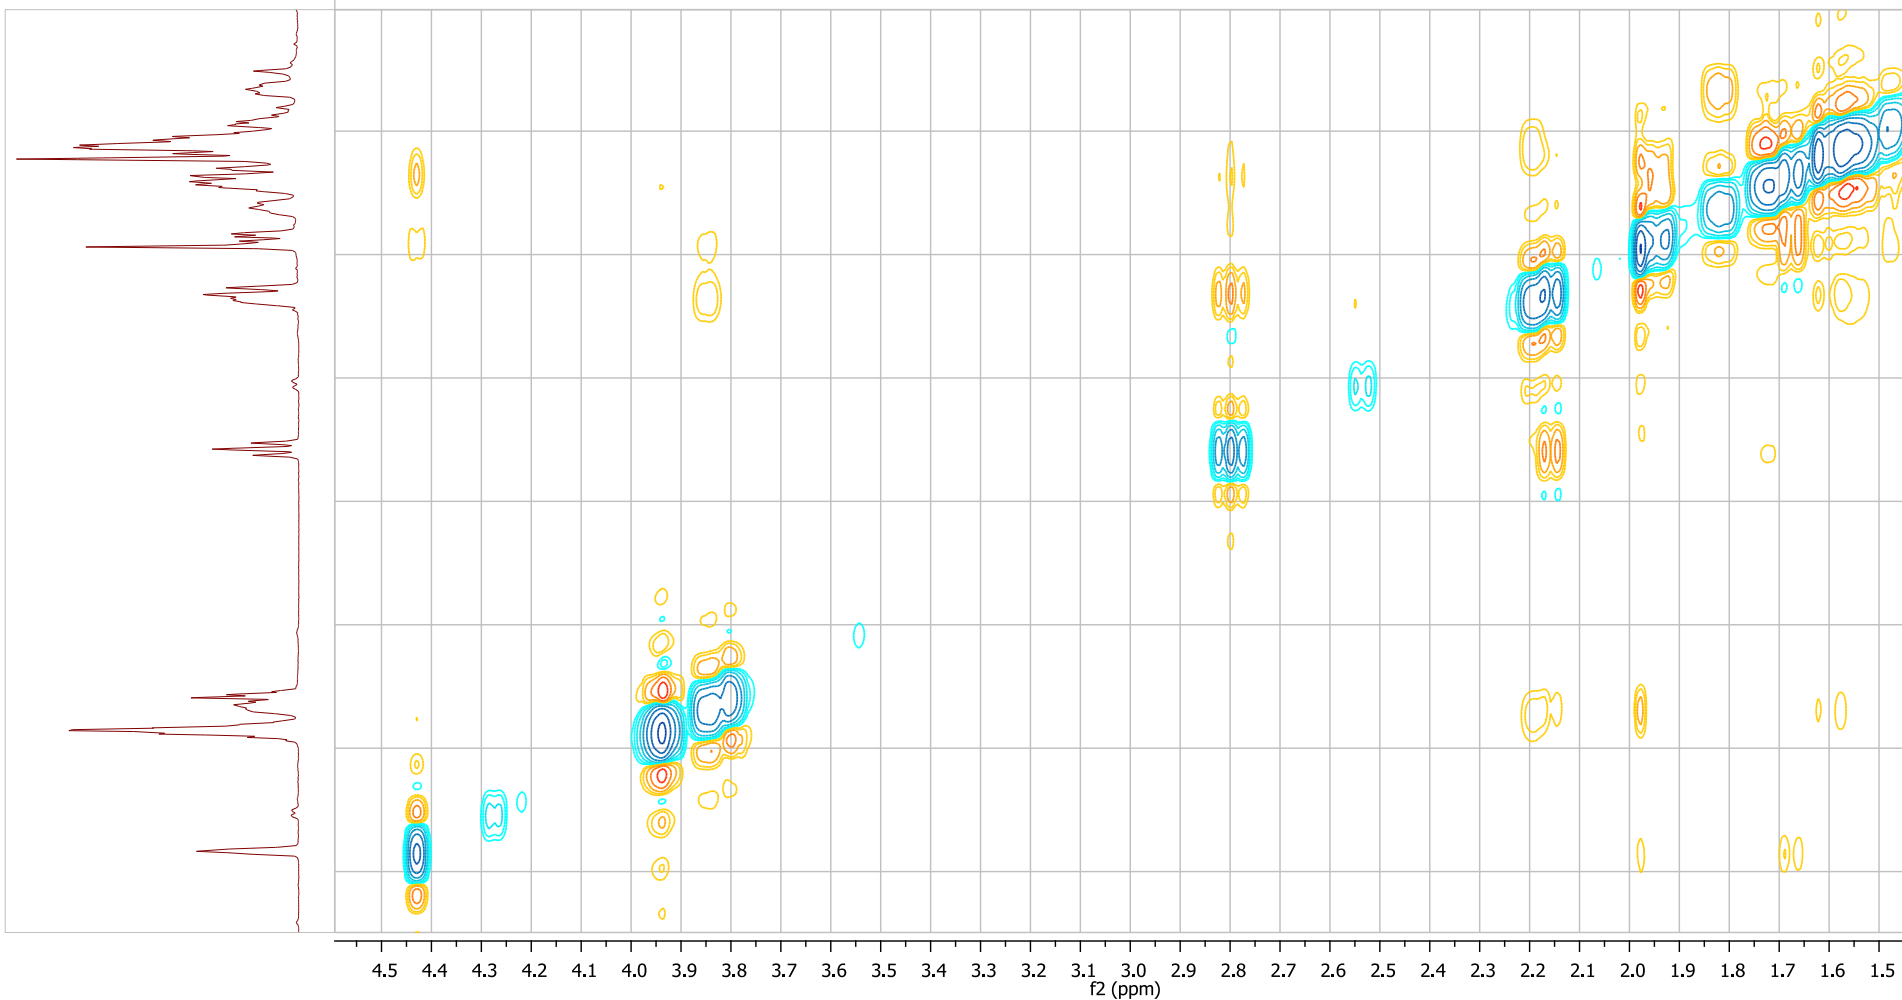



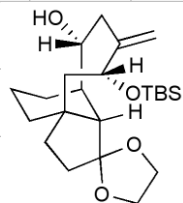

17c

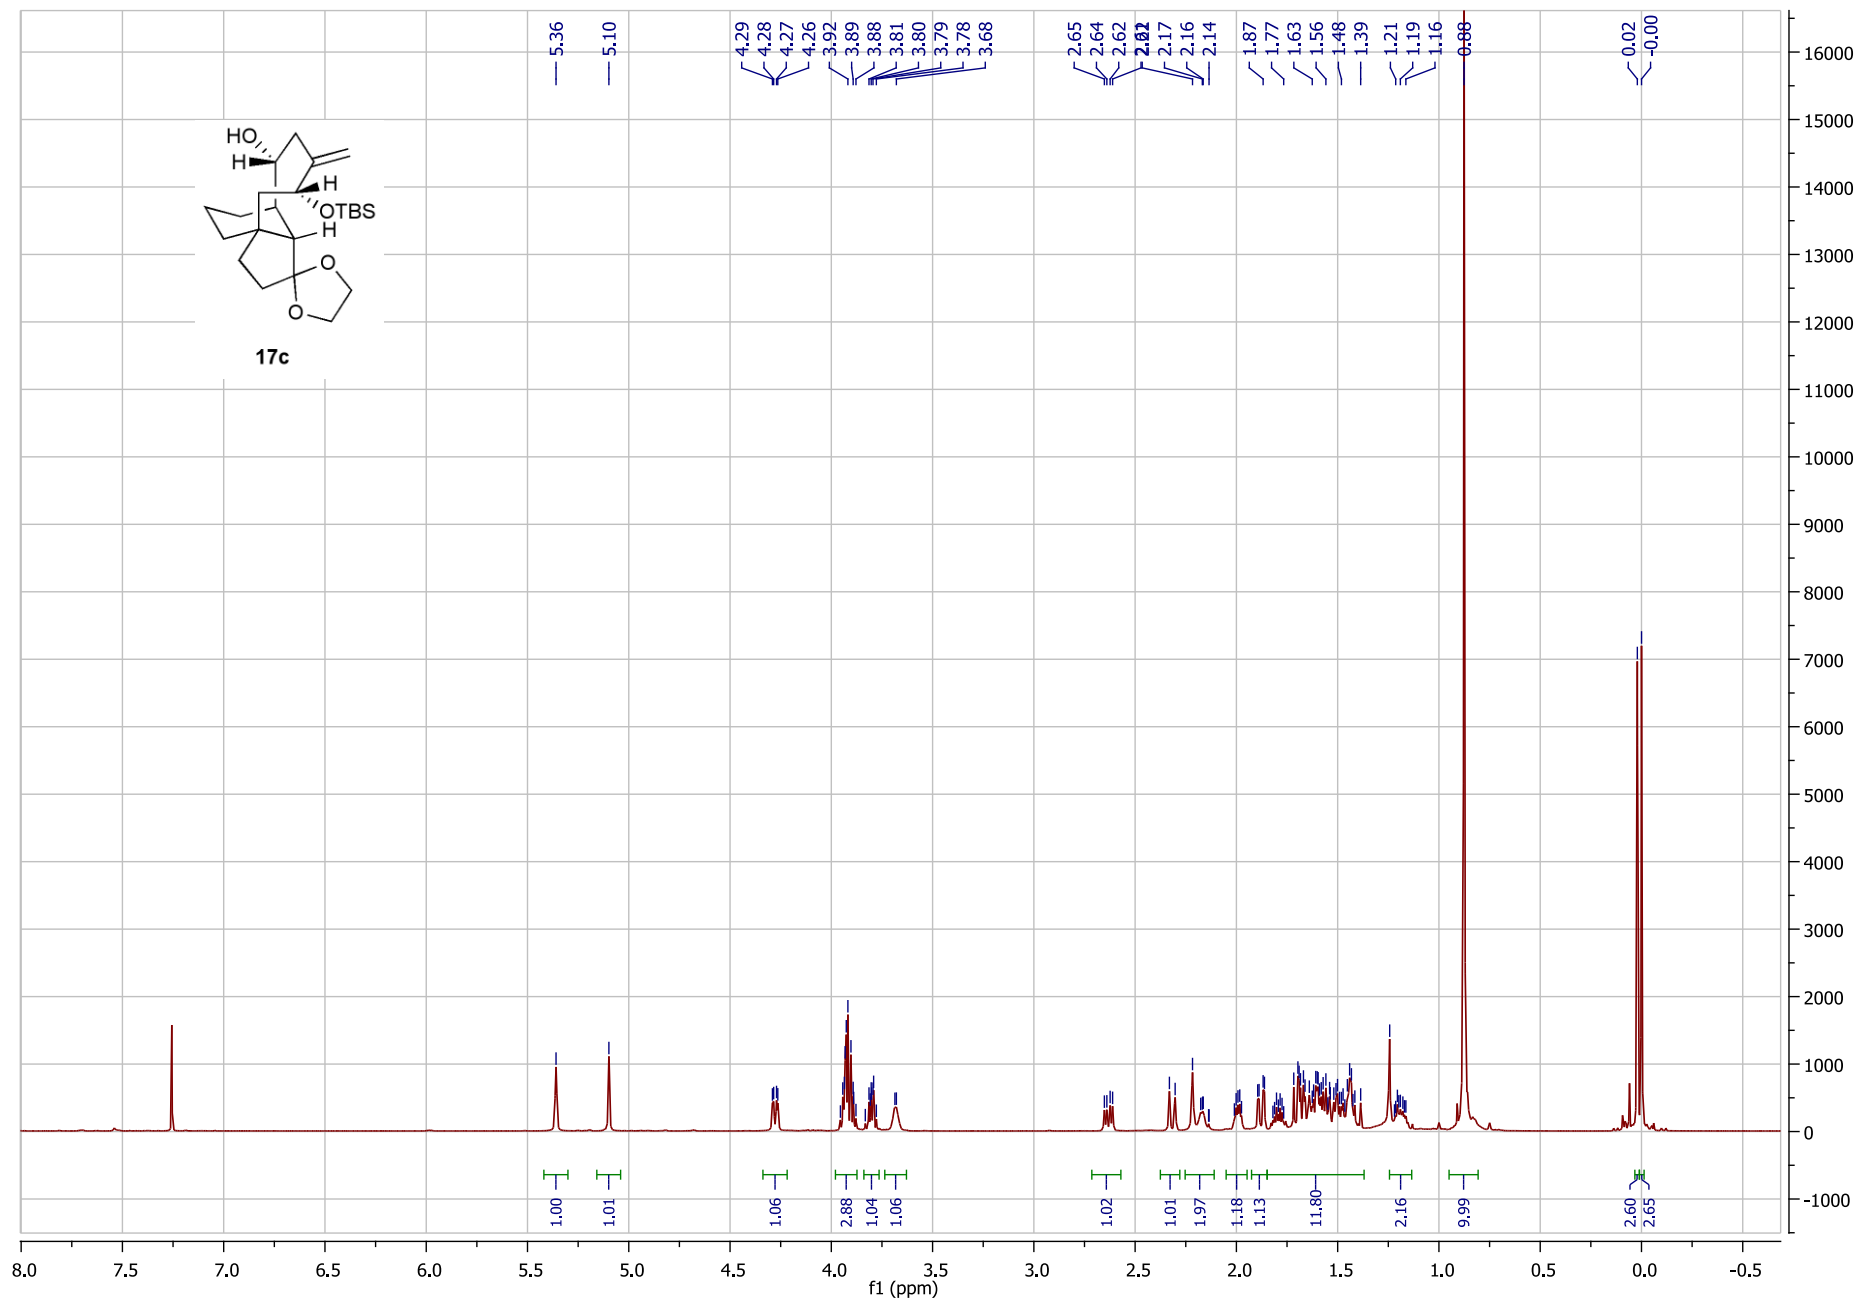

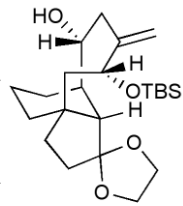

17c

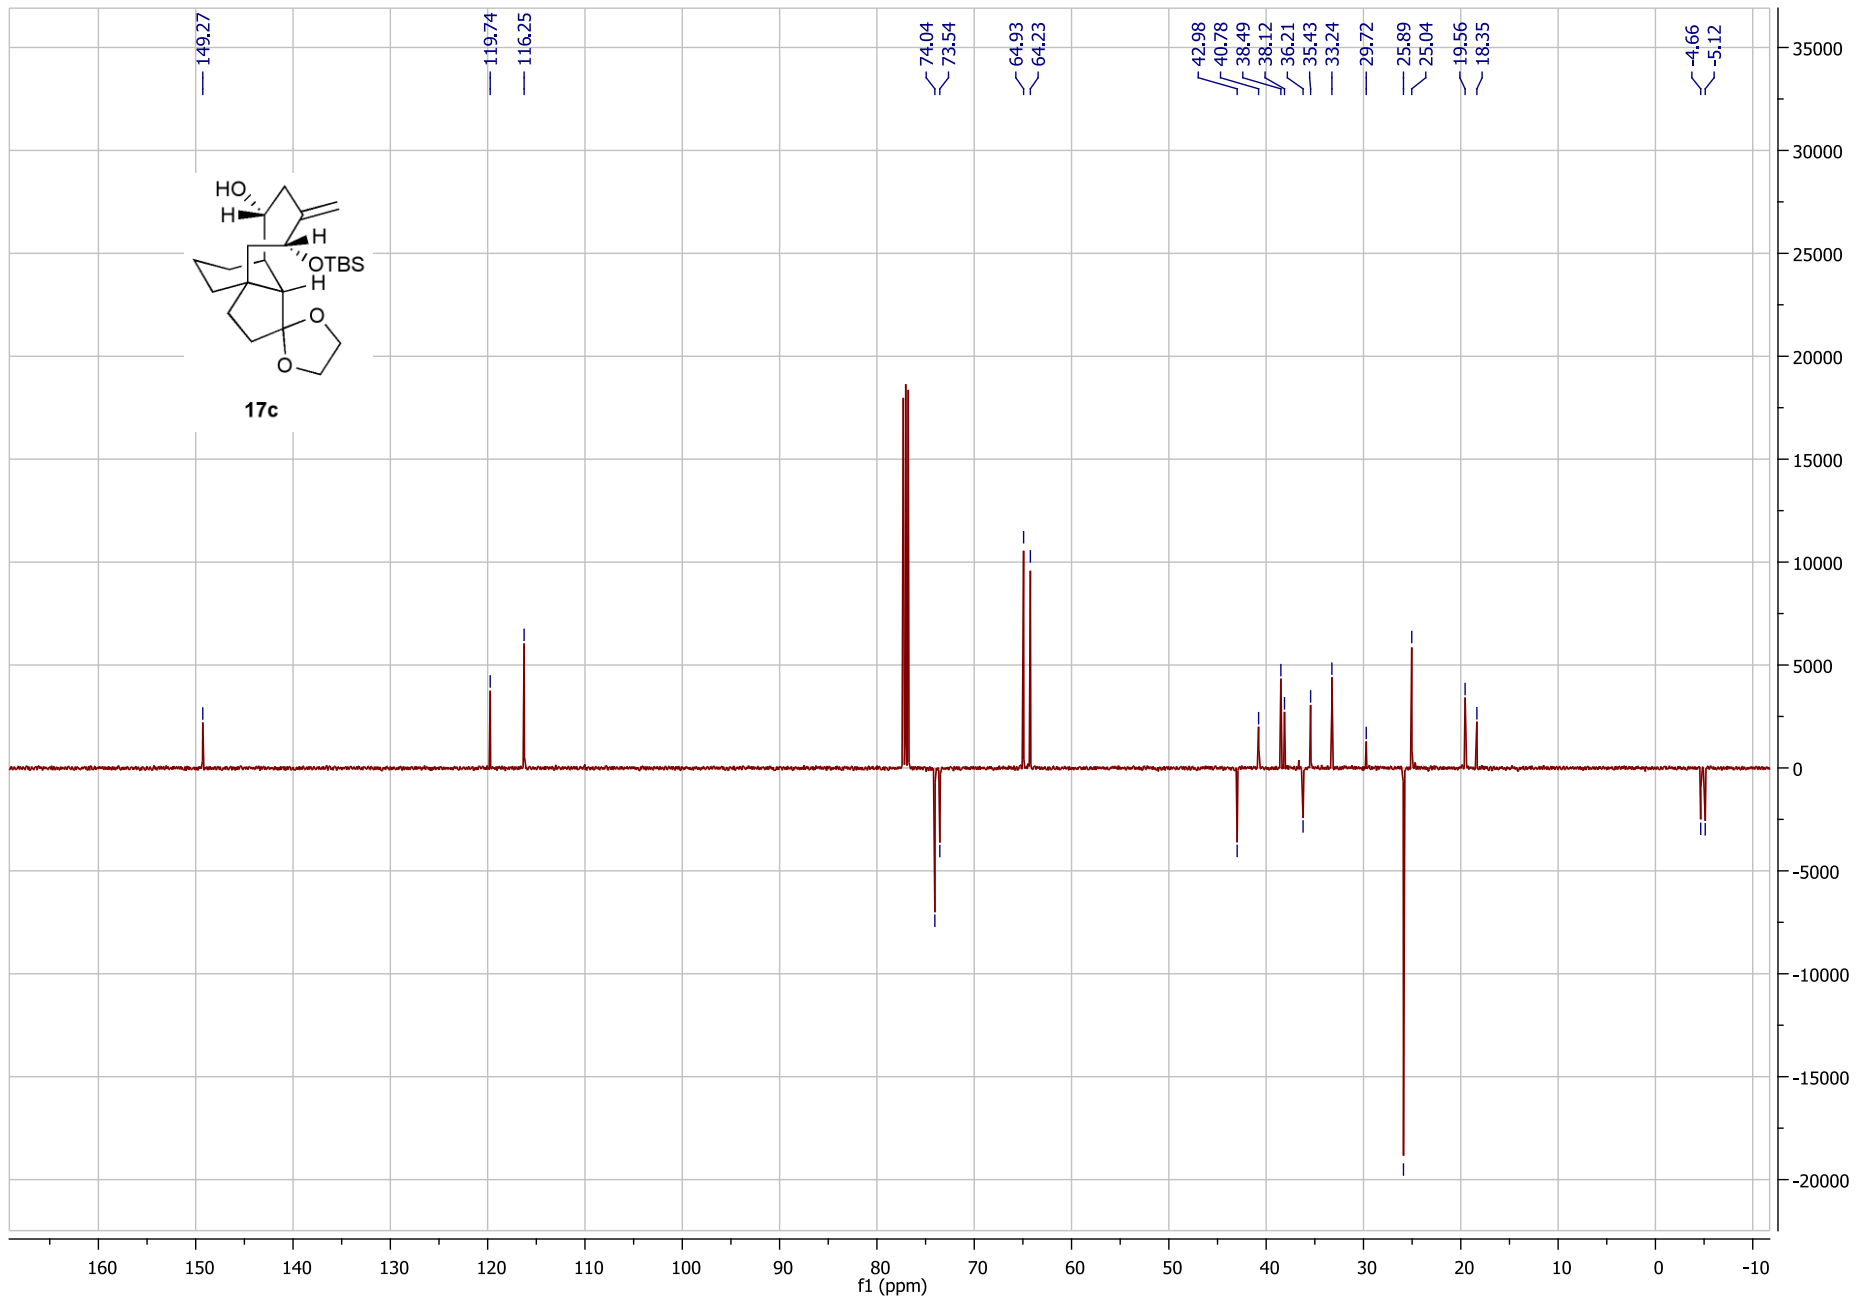

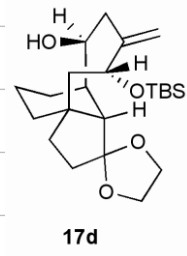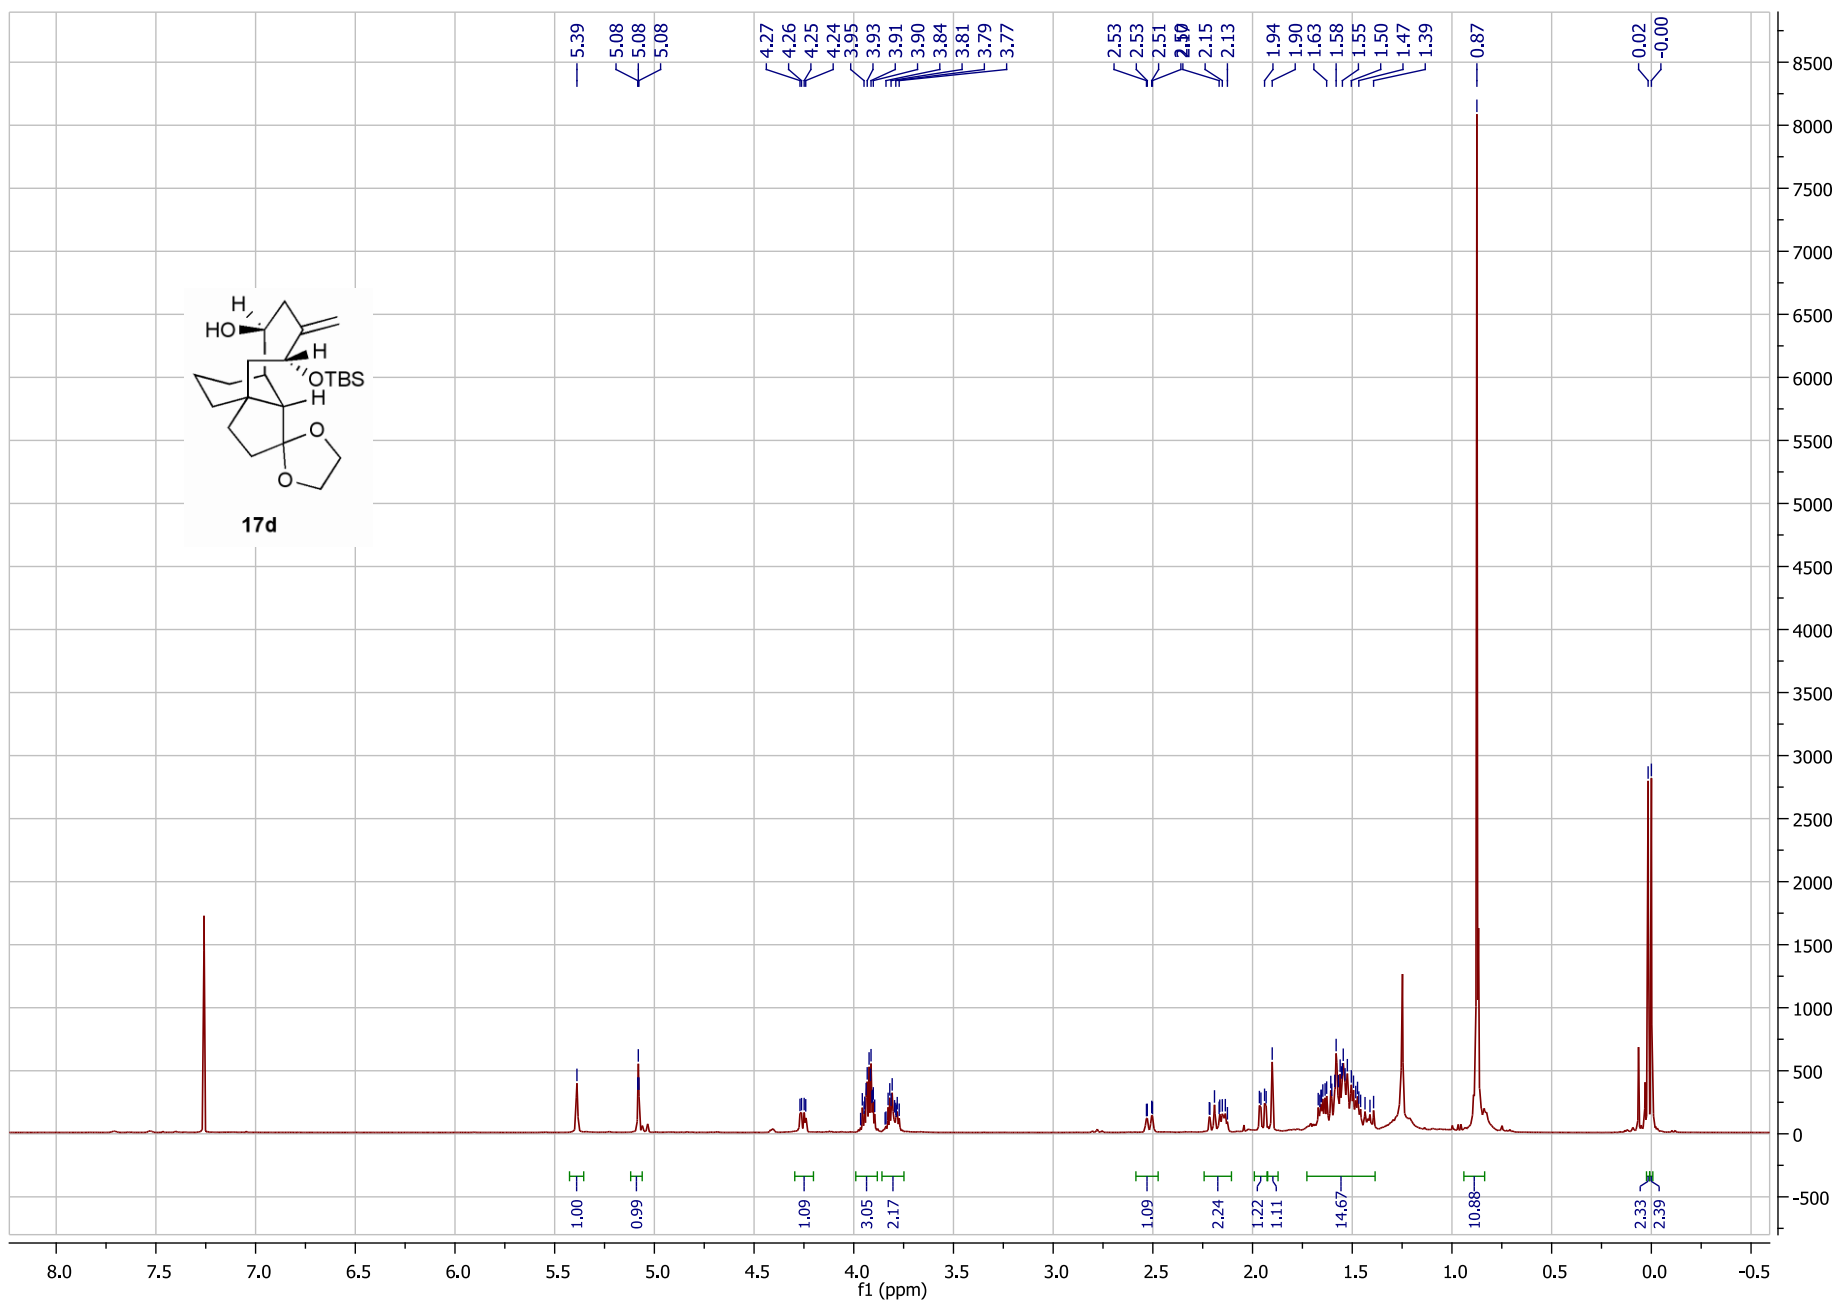

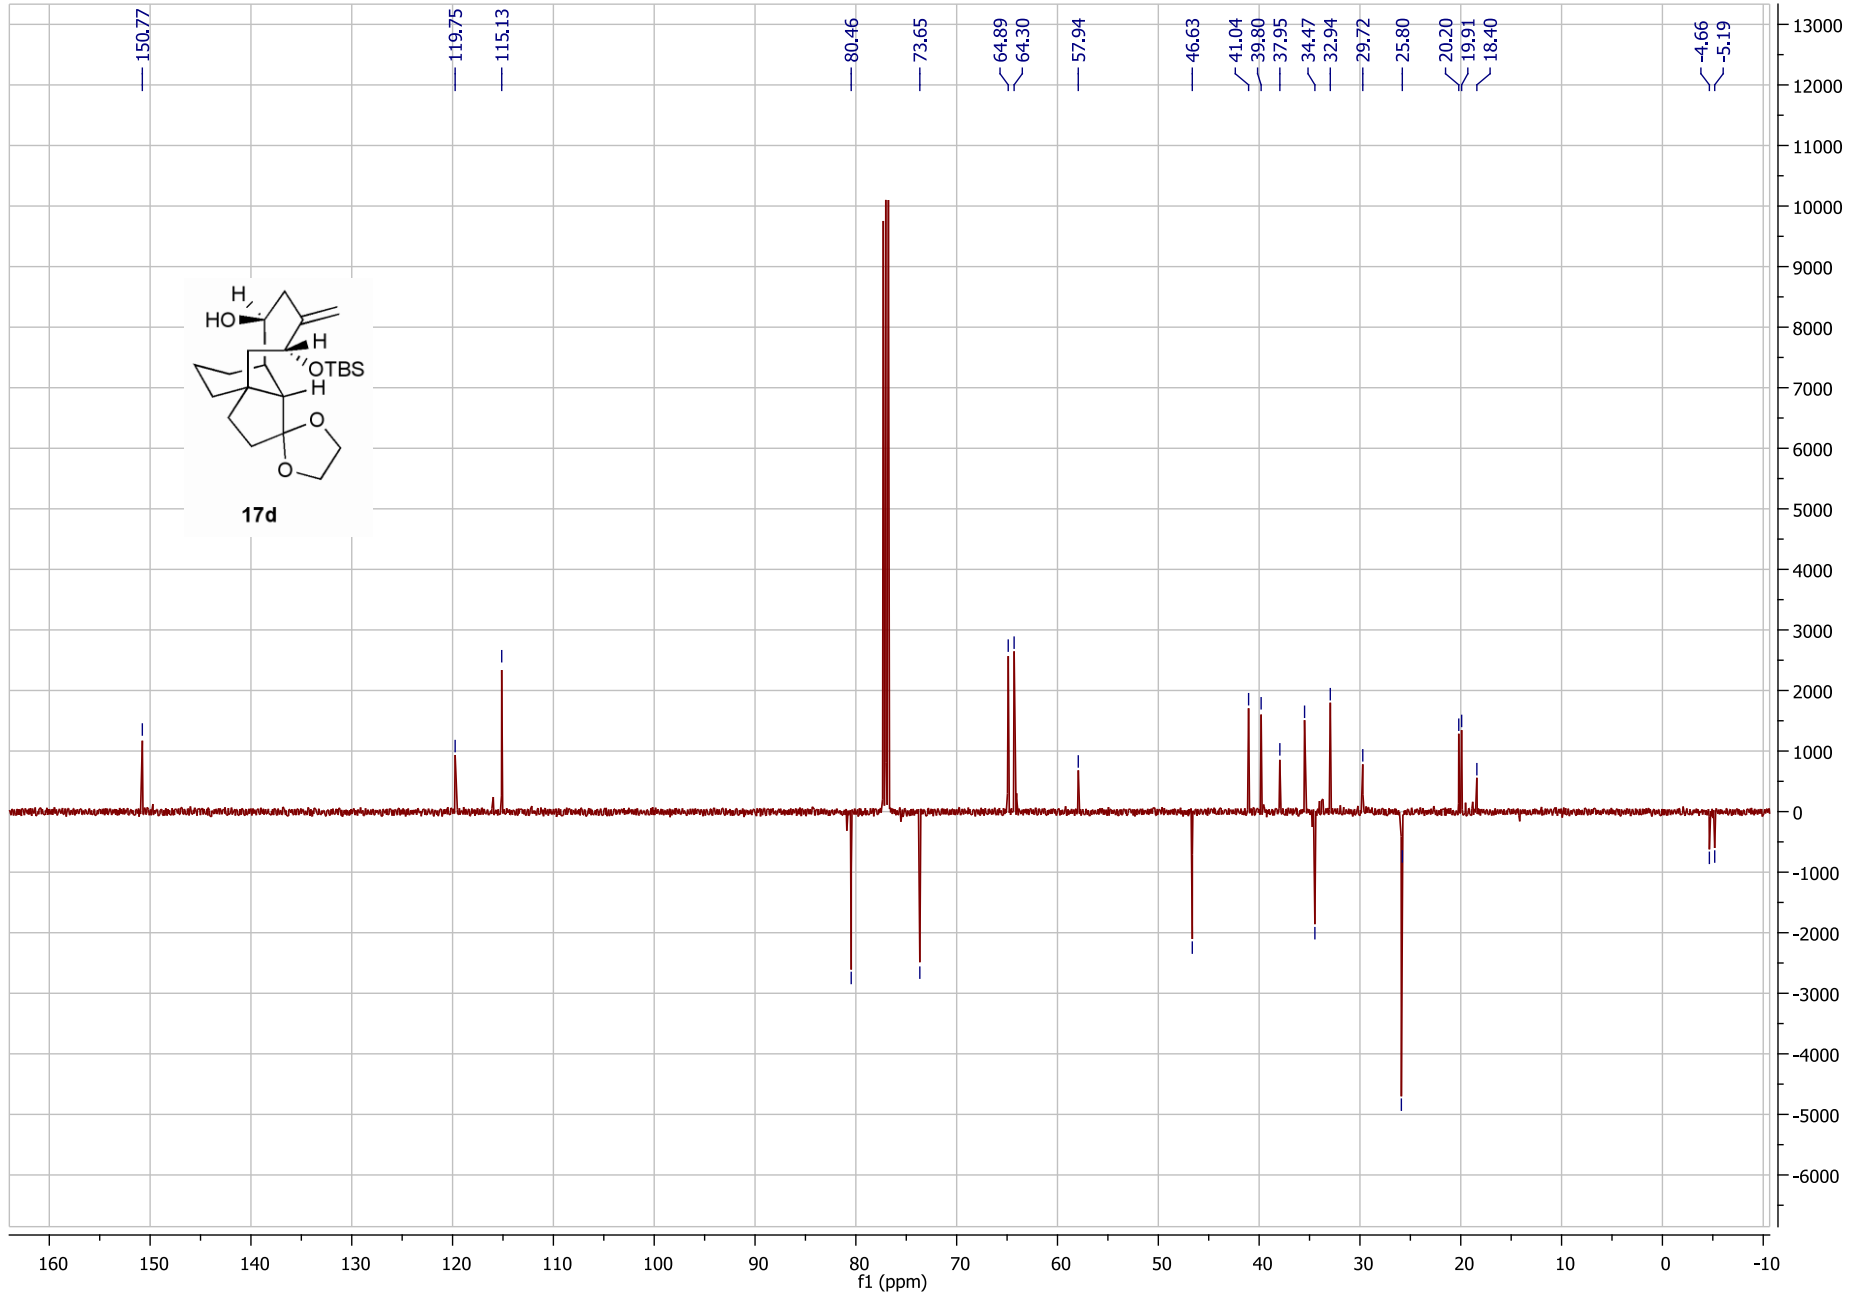

# NOESY analysis of 17d

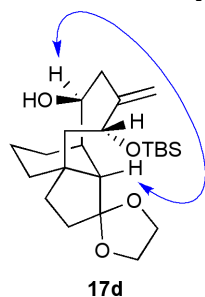

↔ = nOe

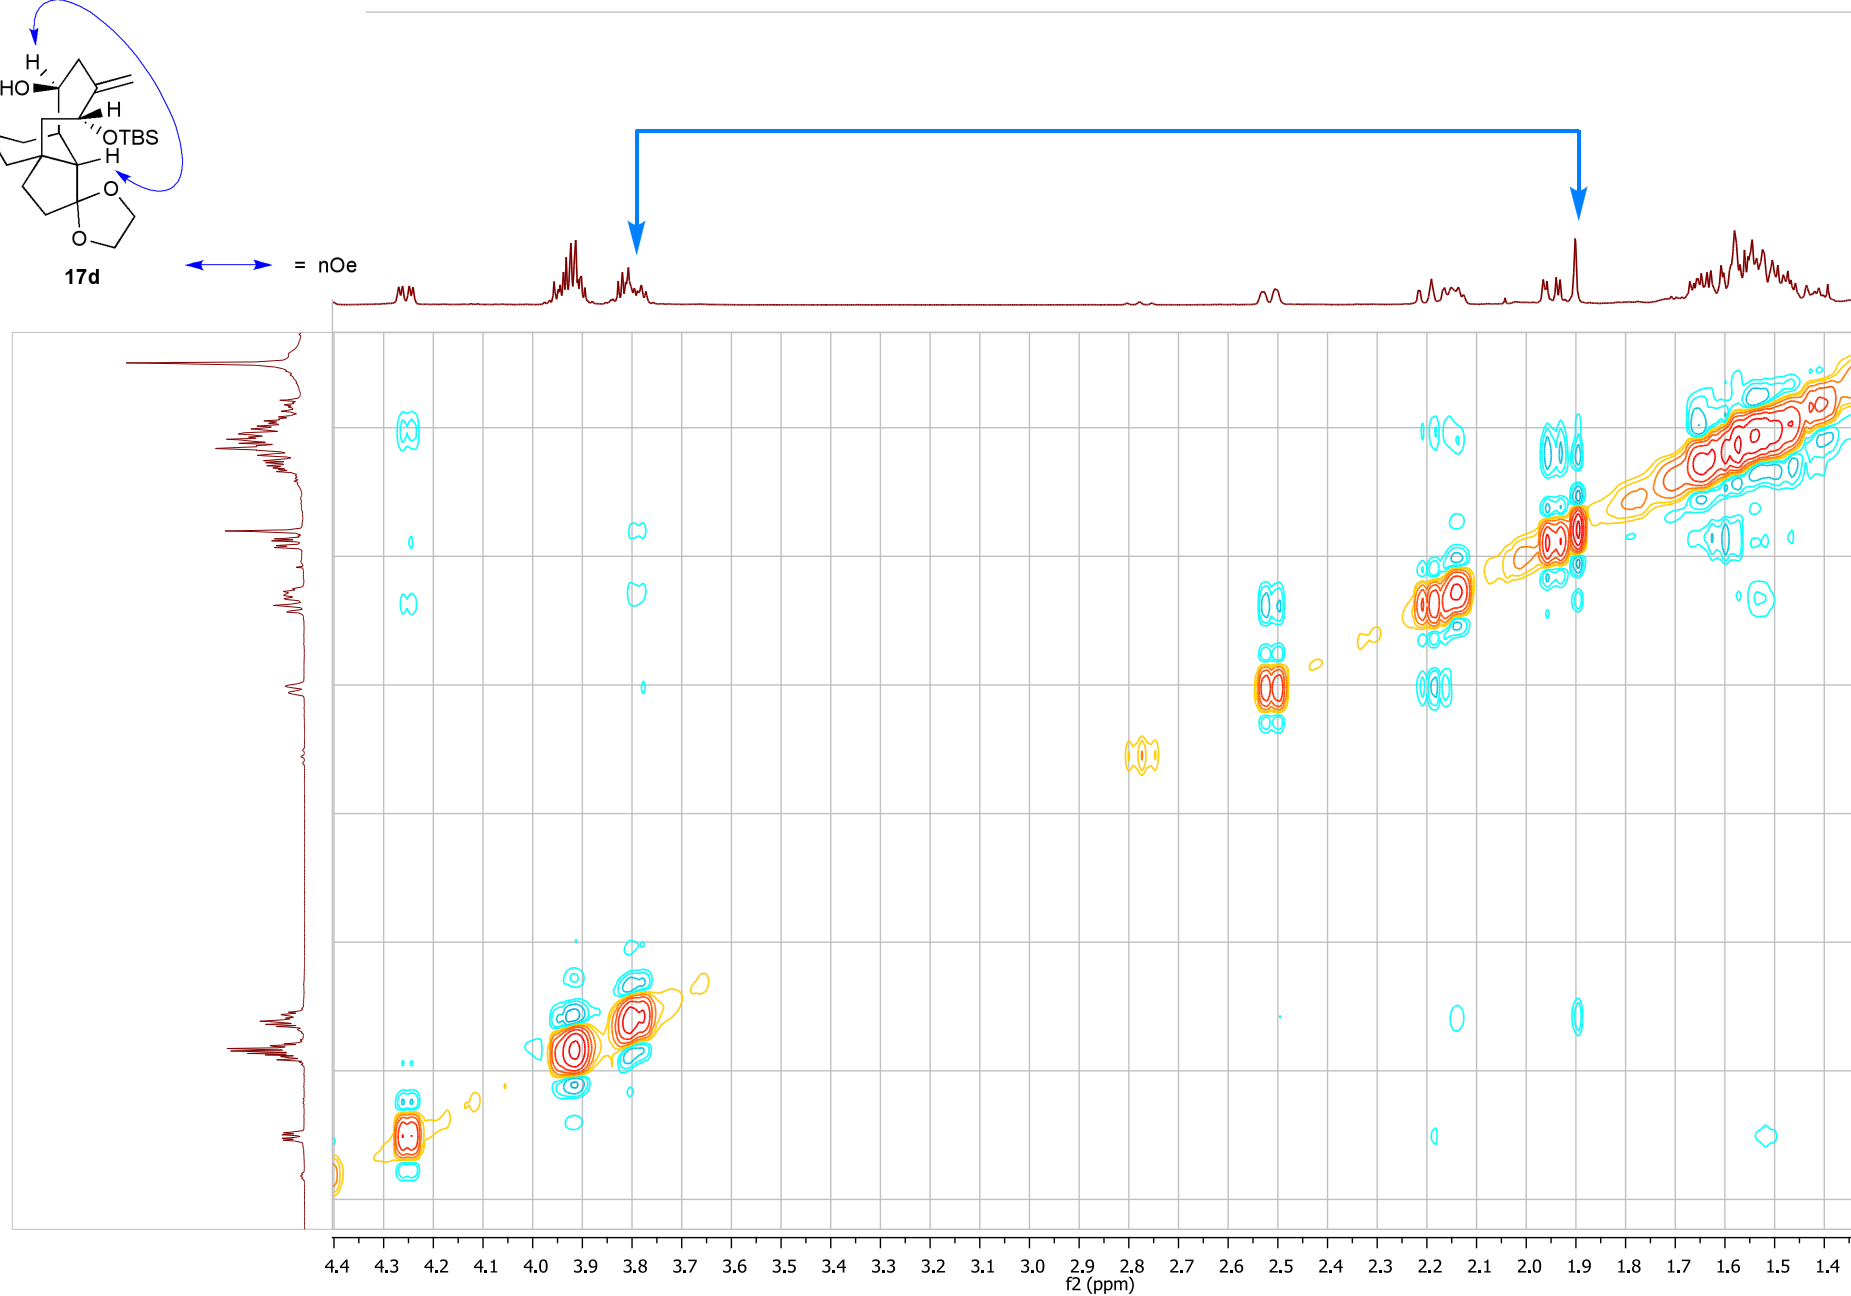

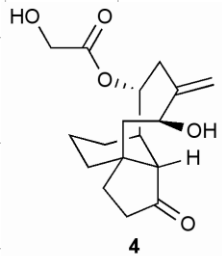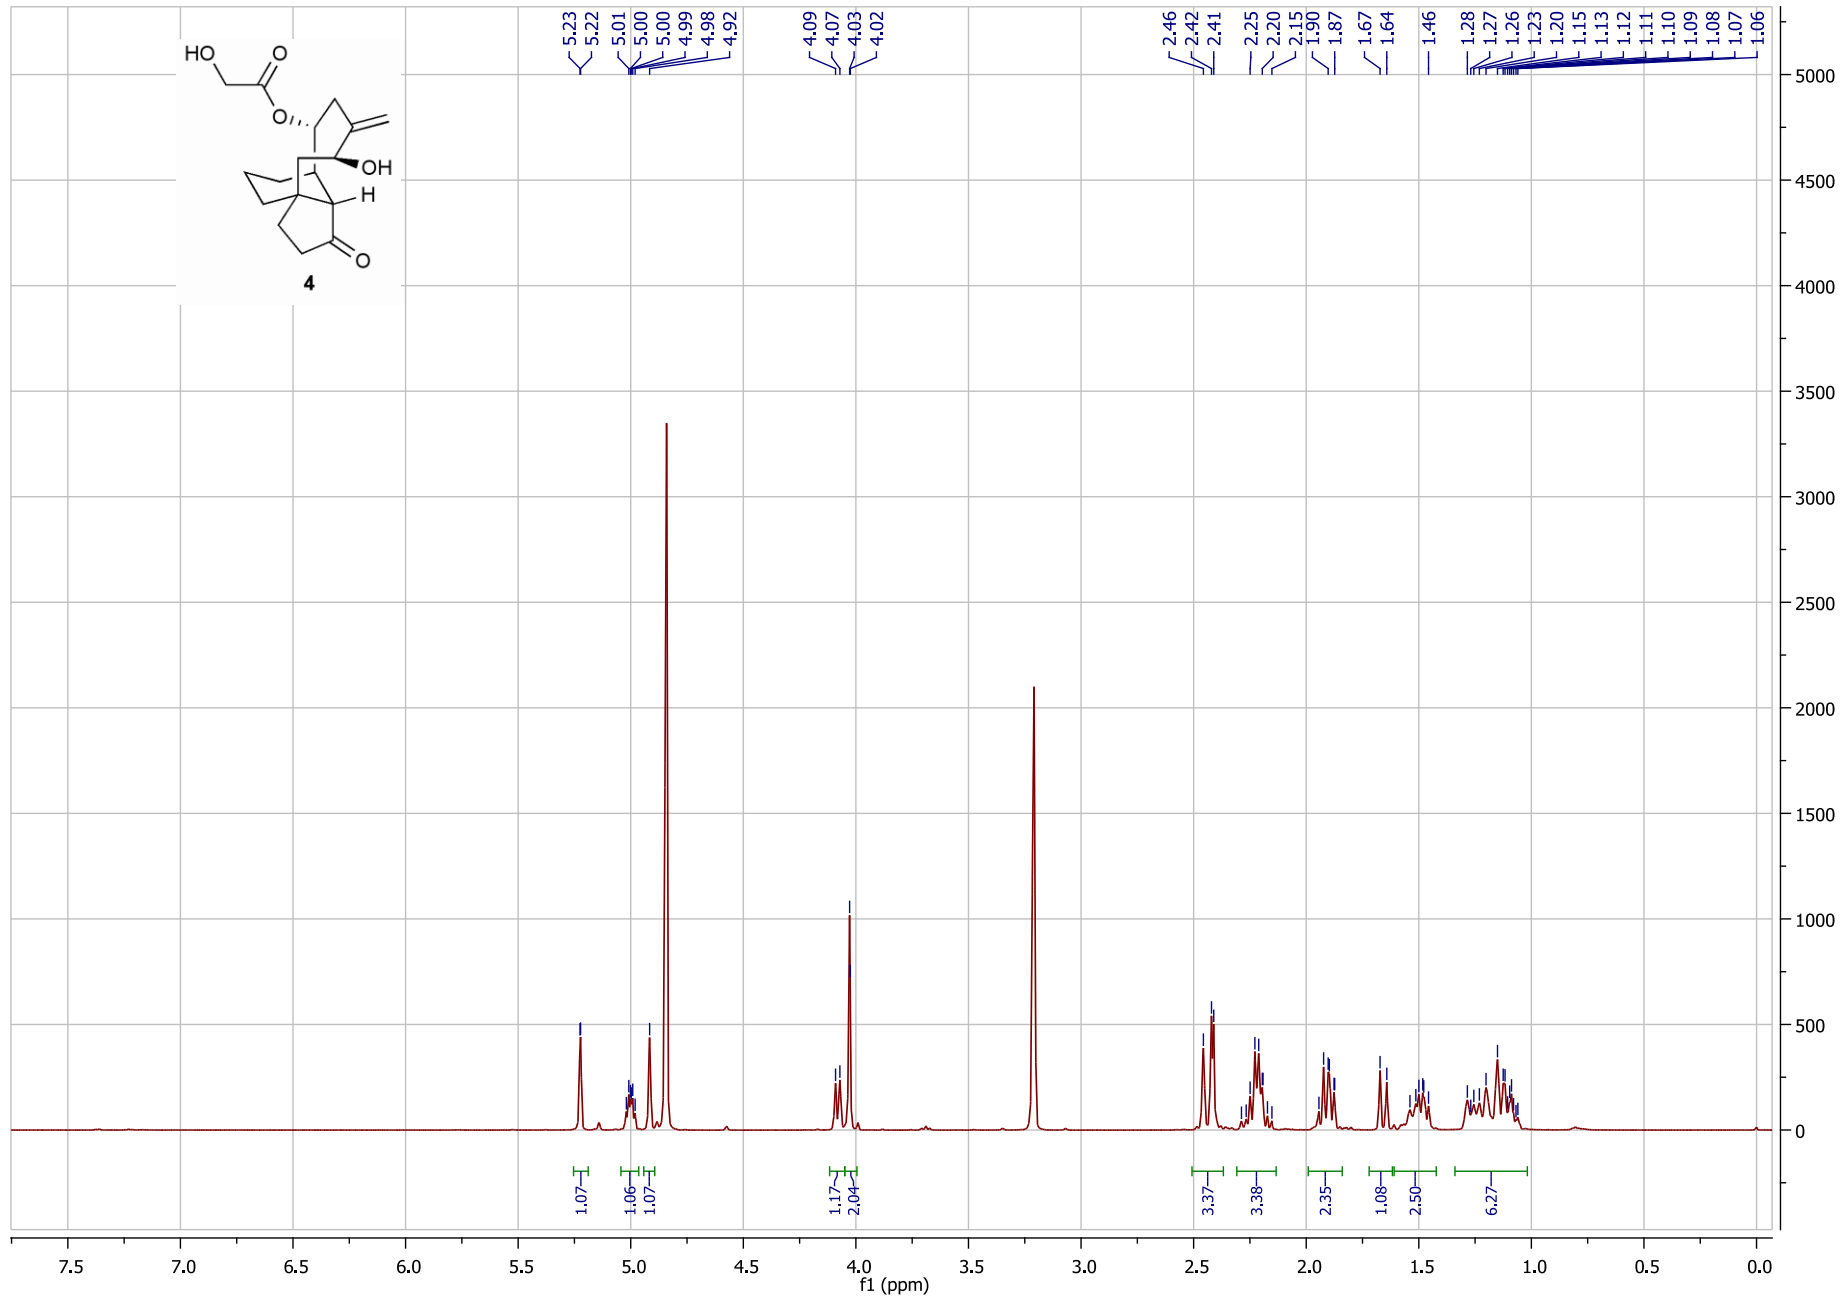

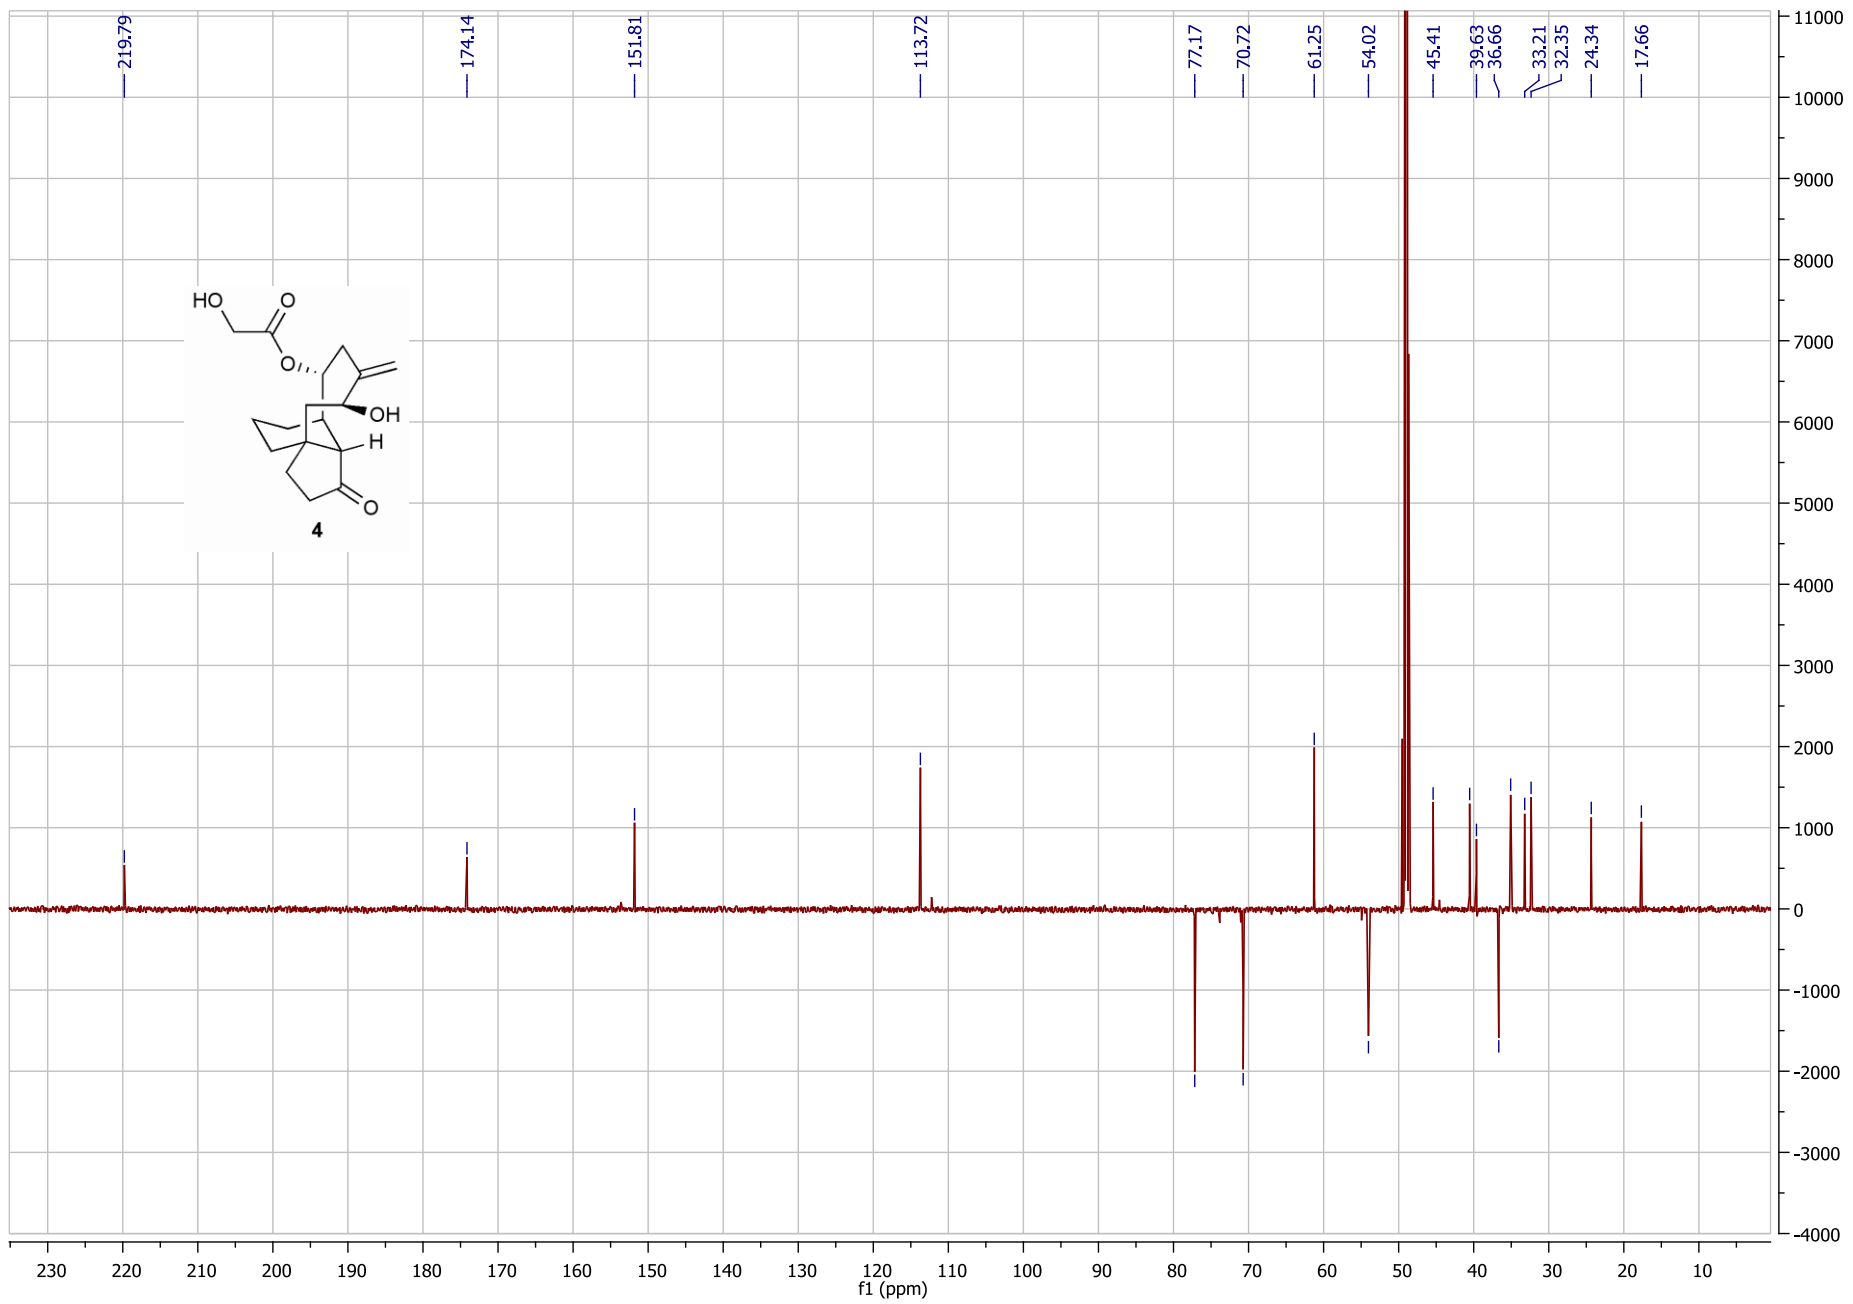

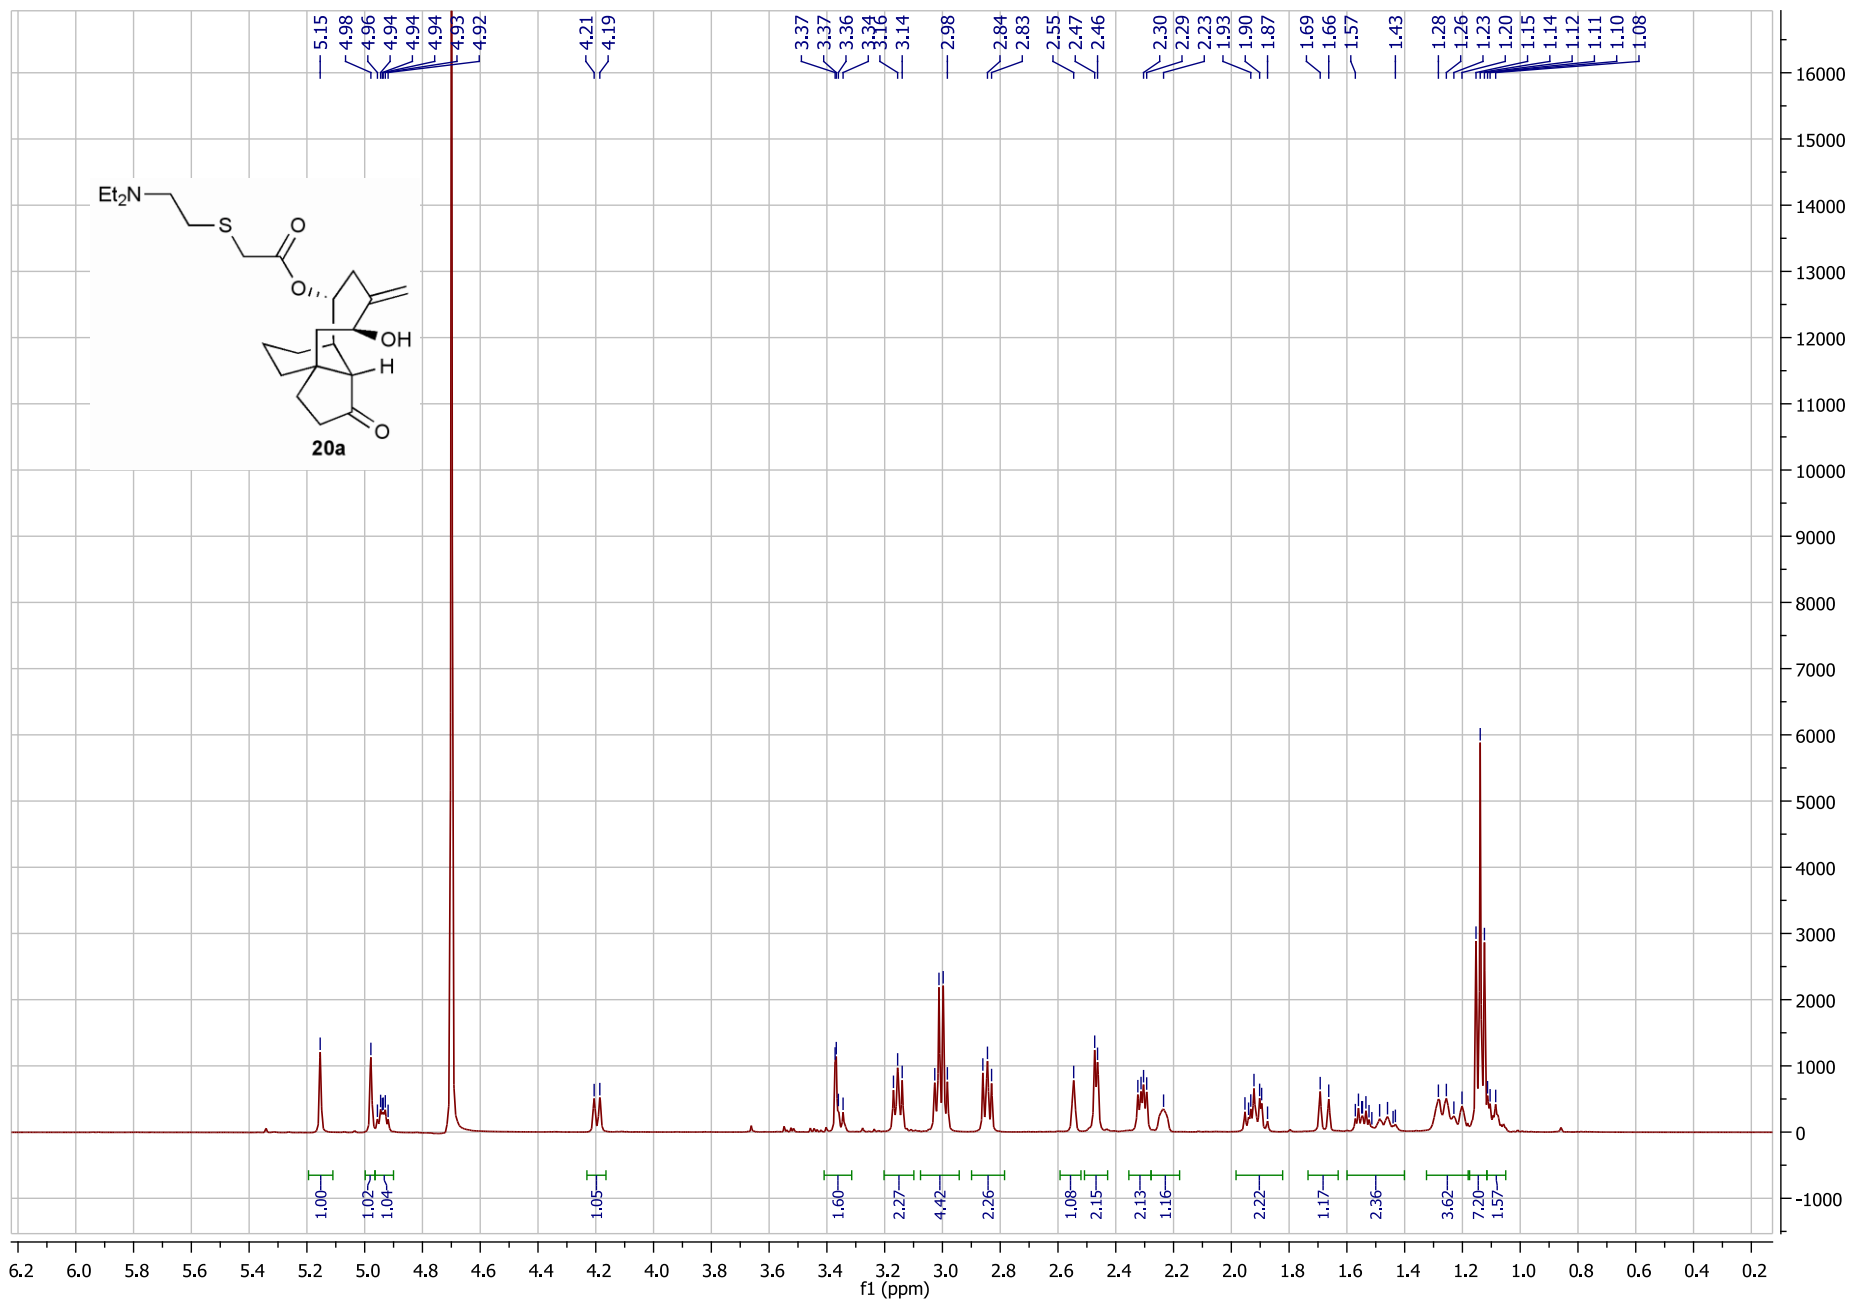



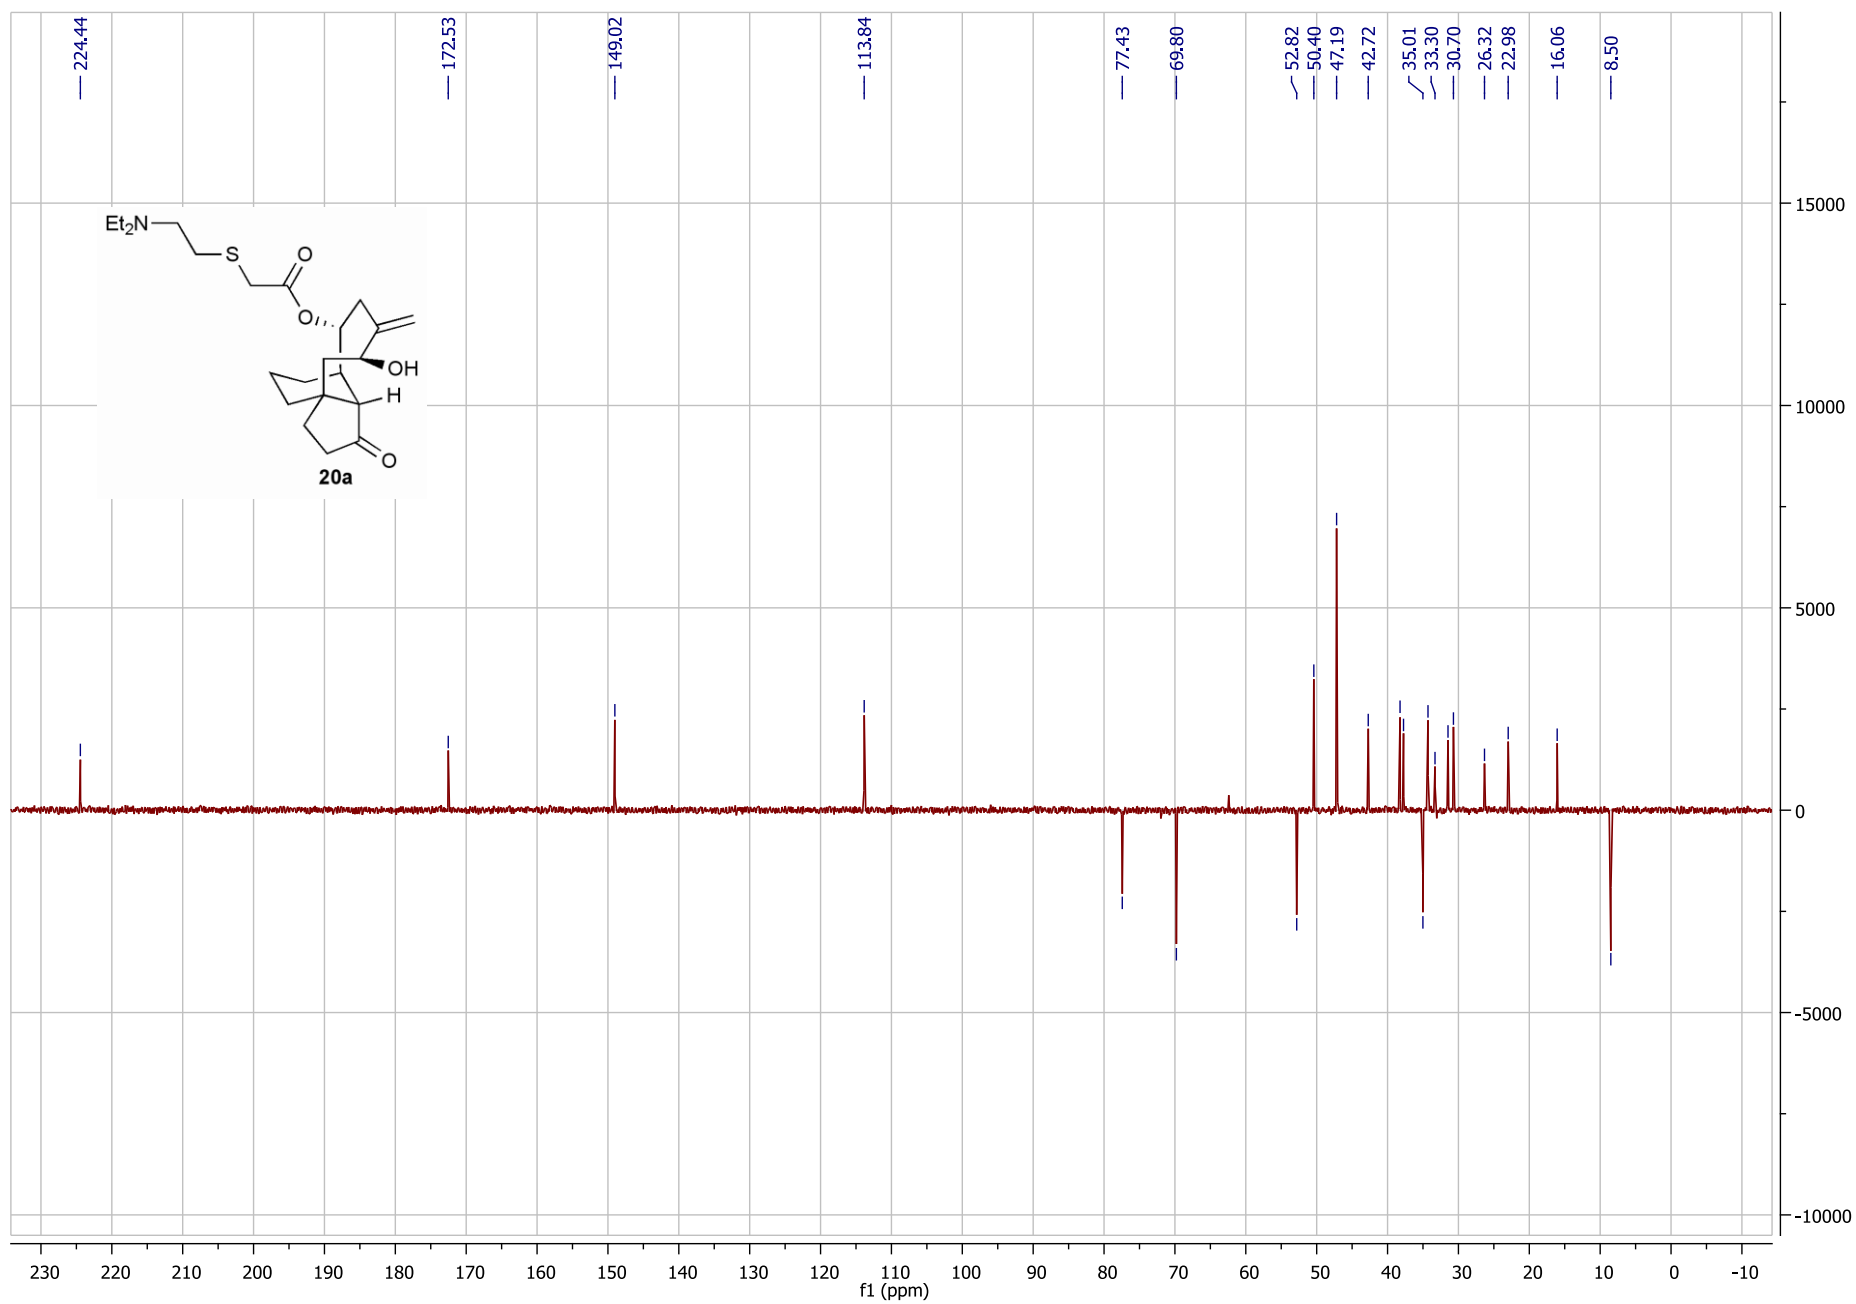

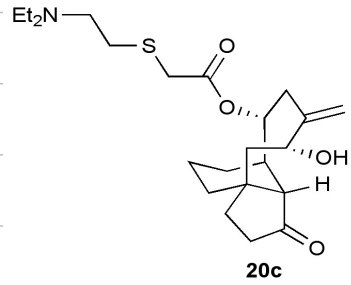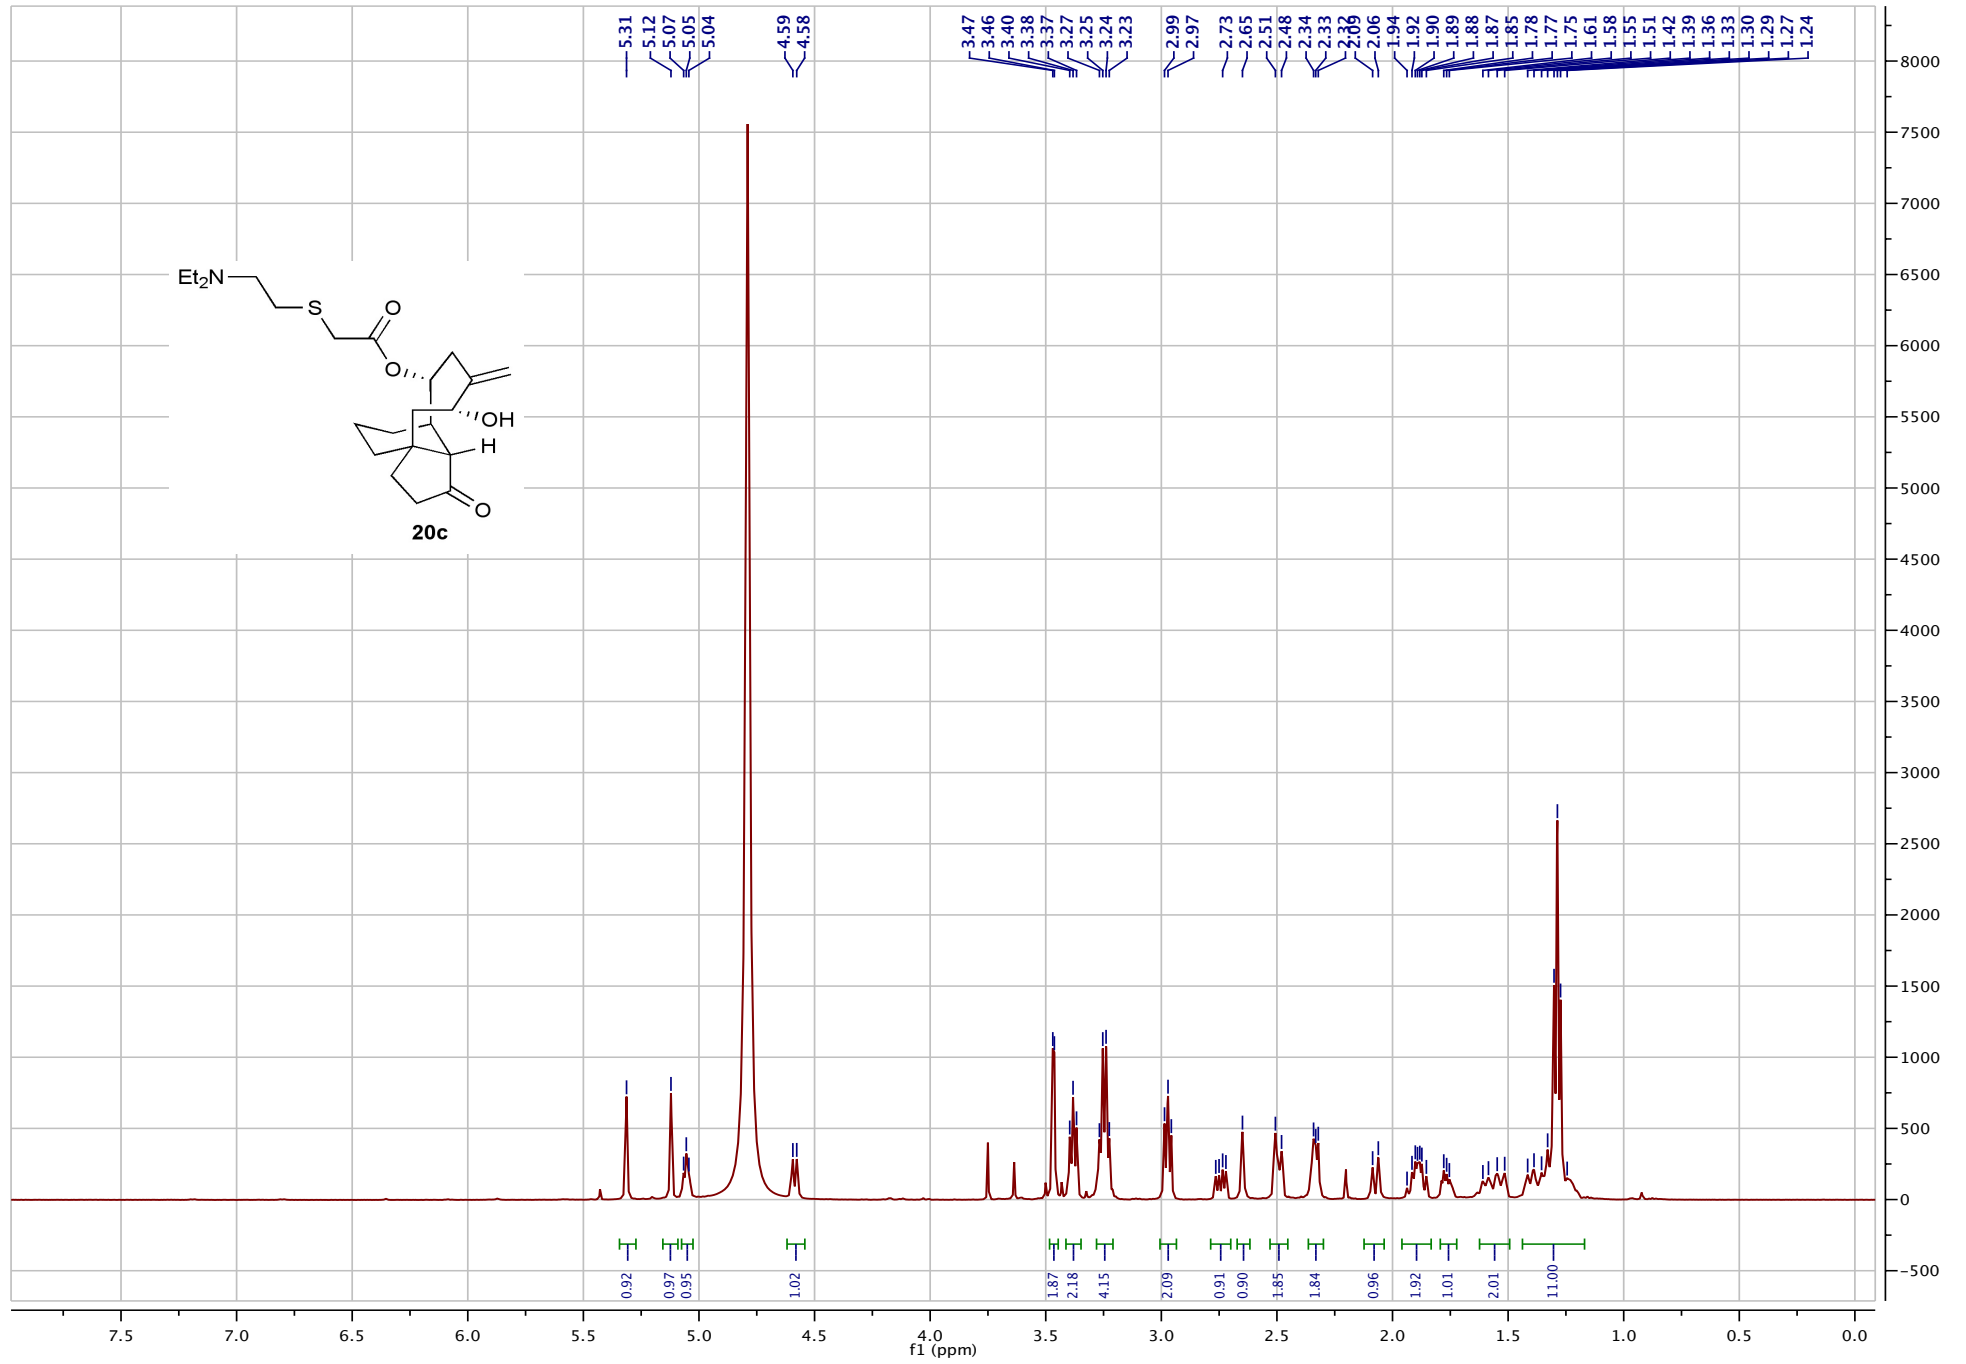

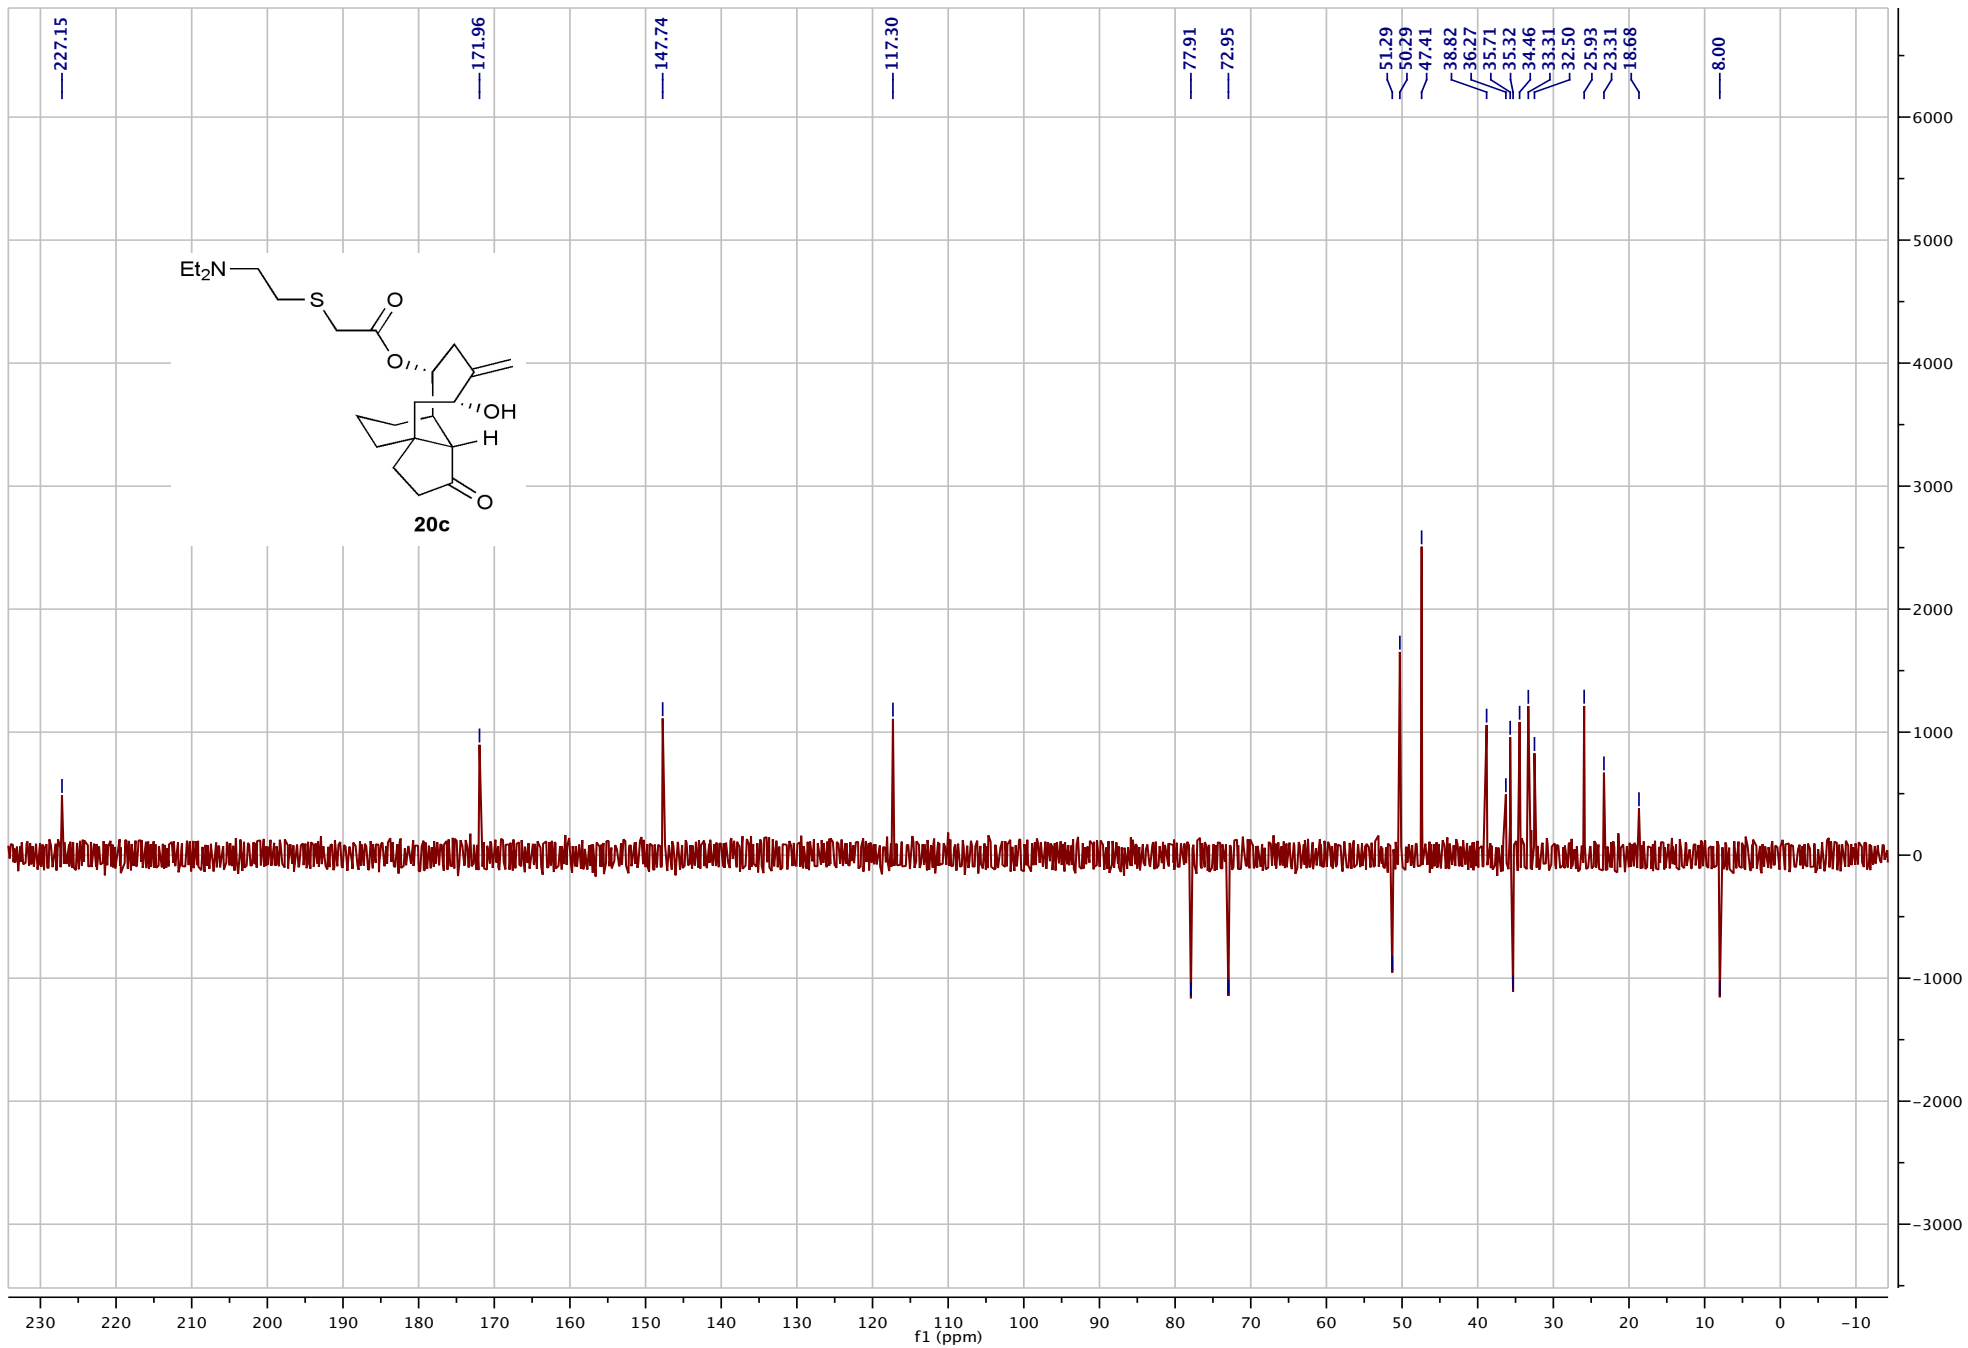

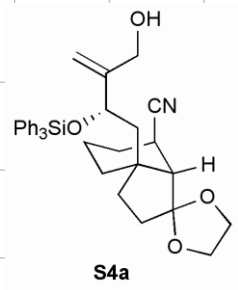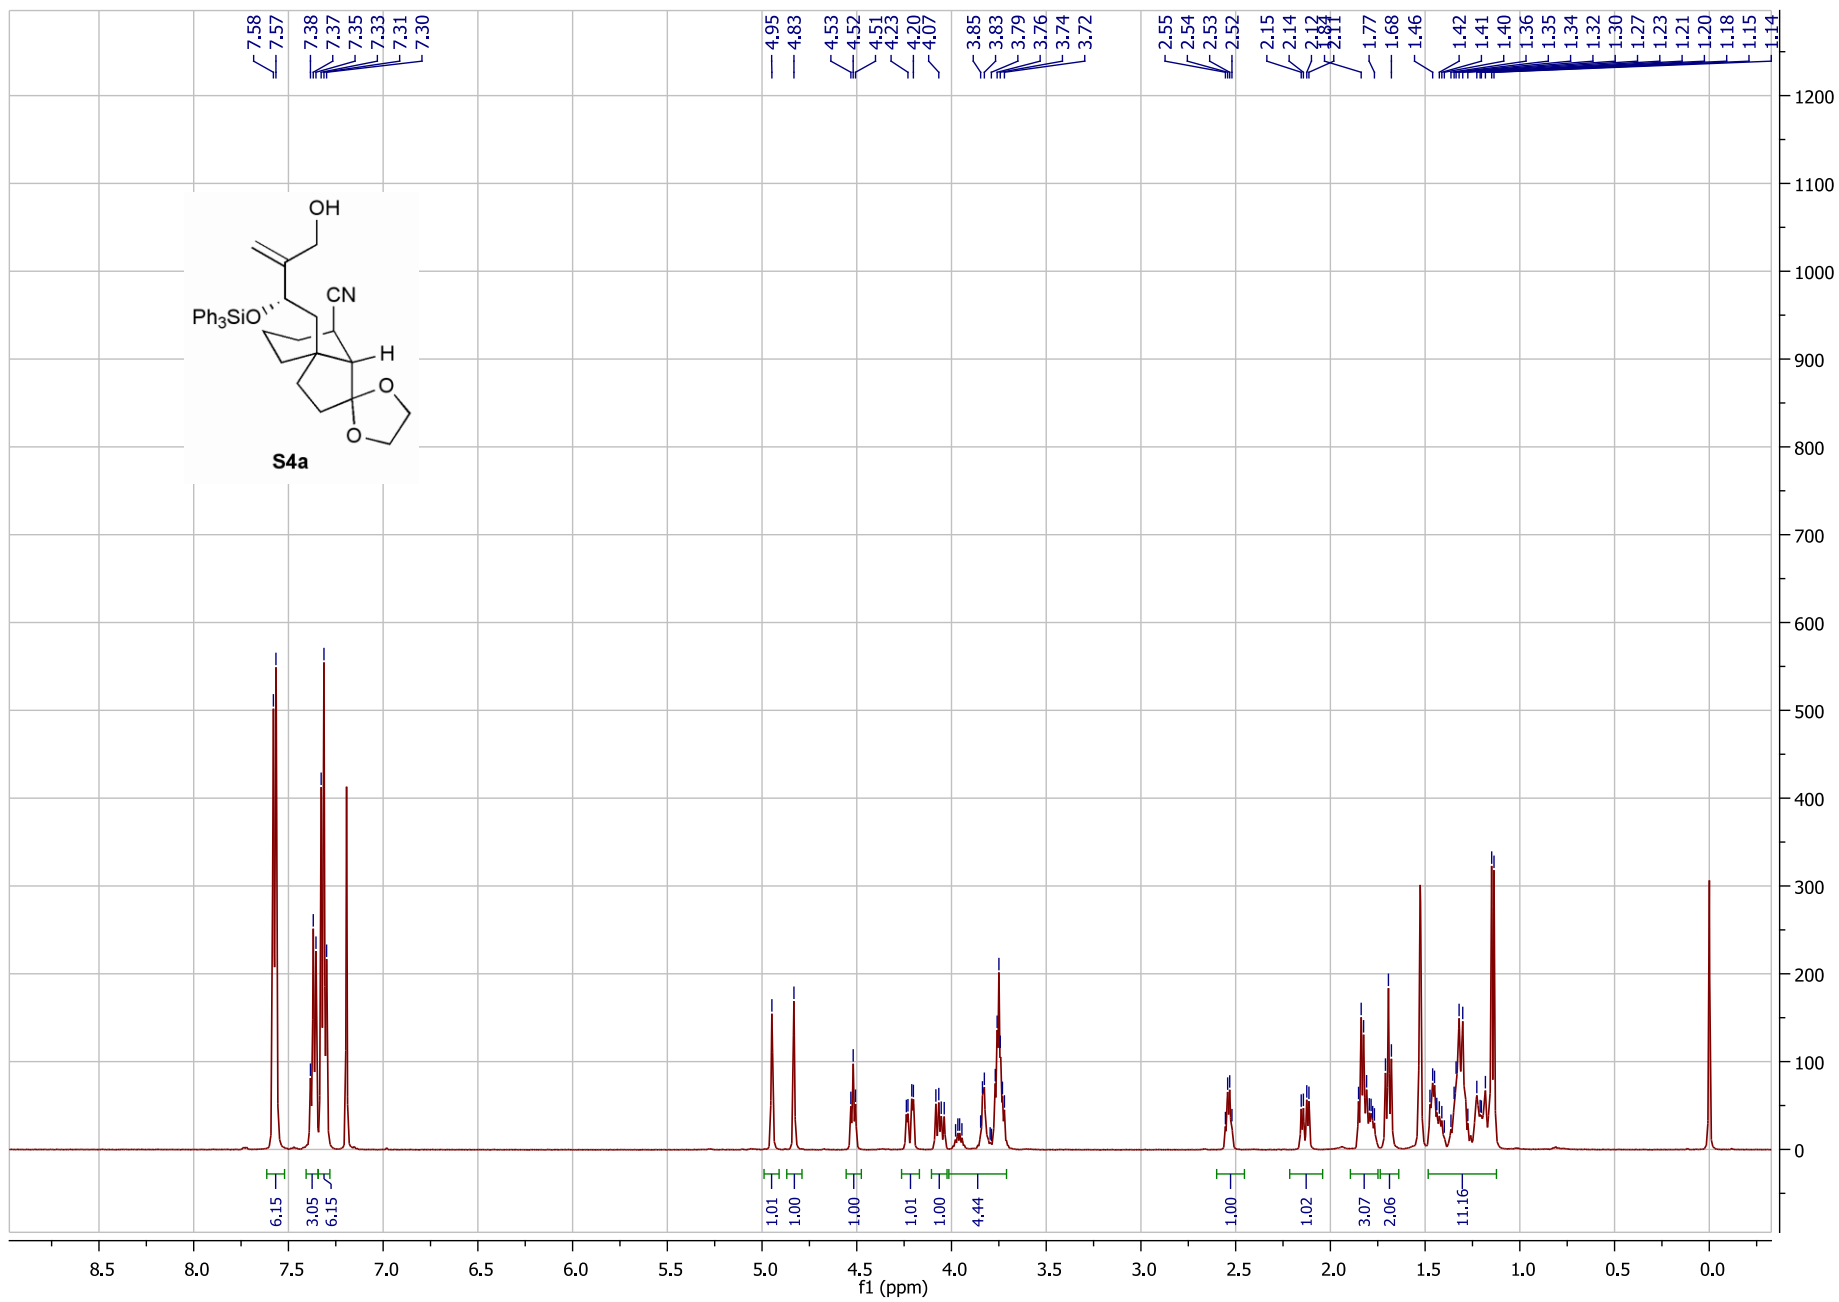

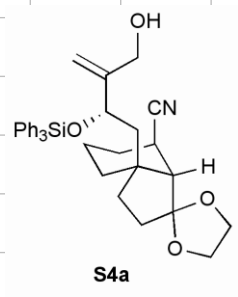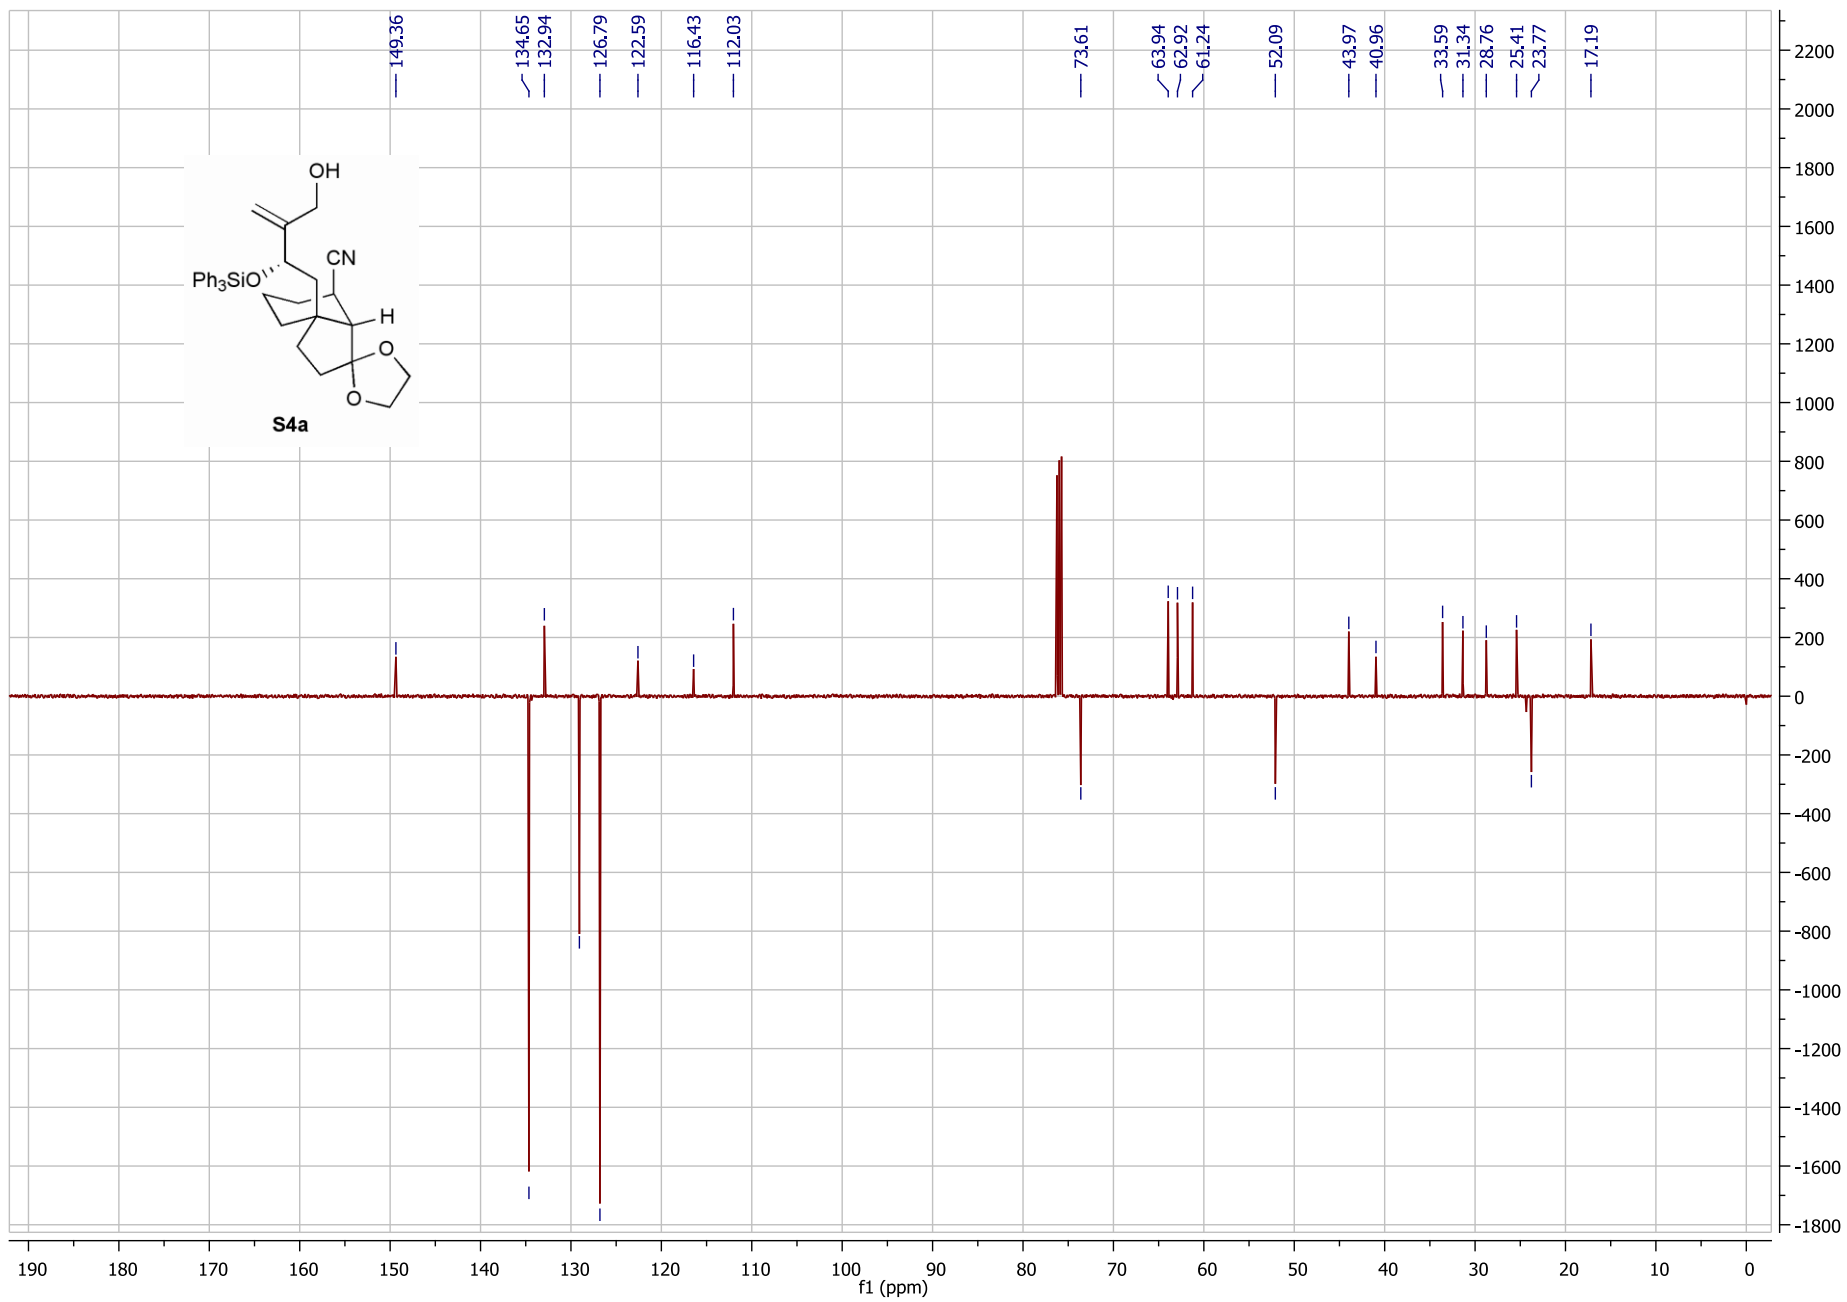

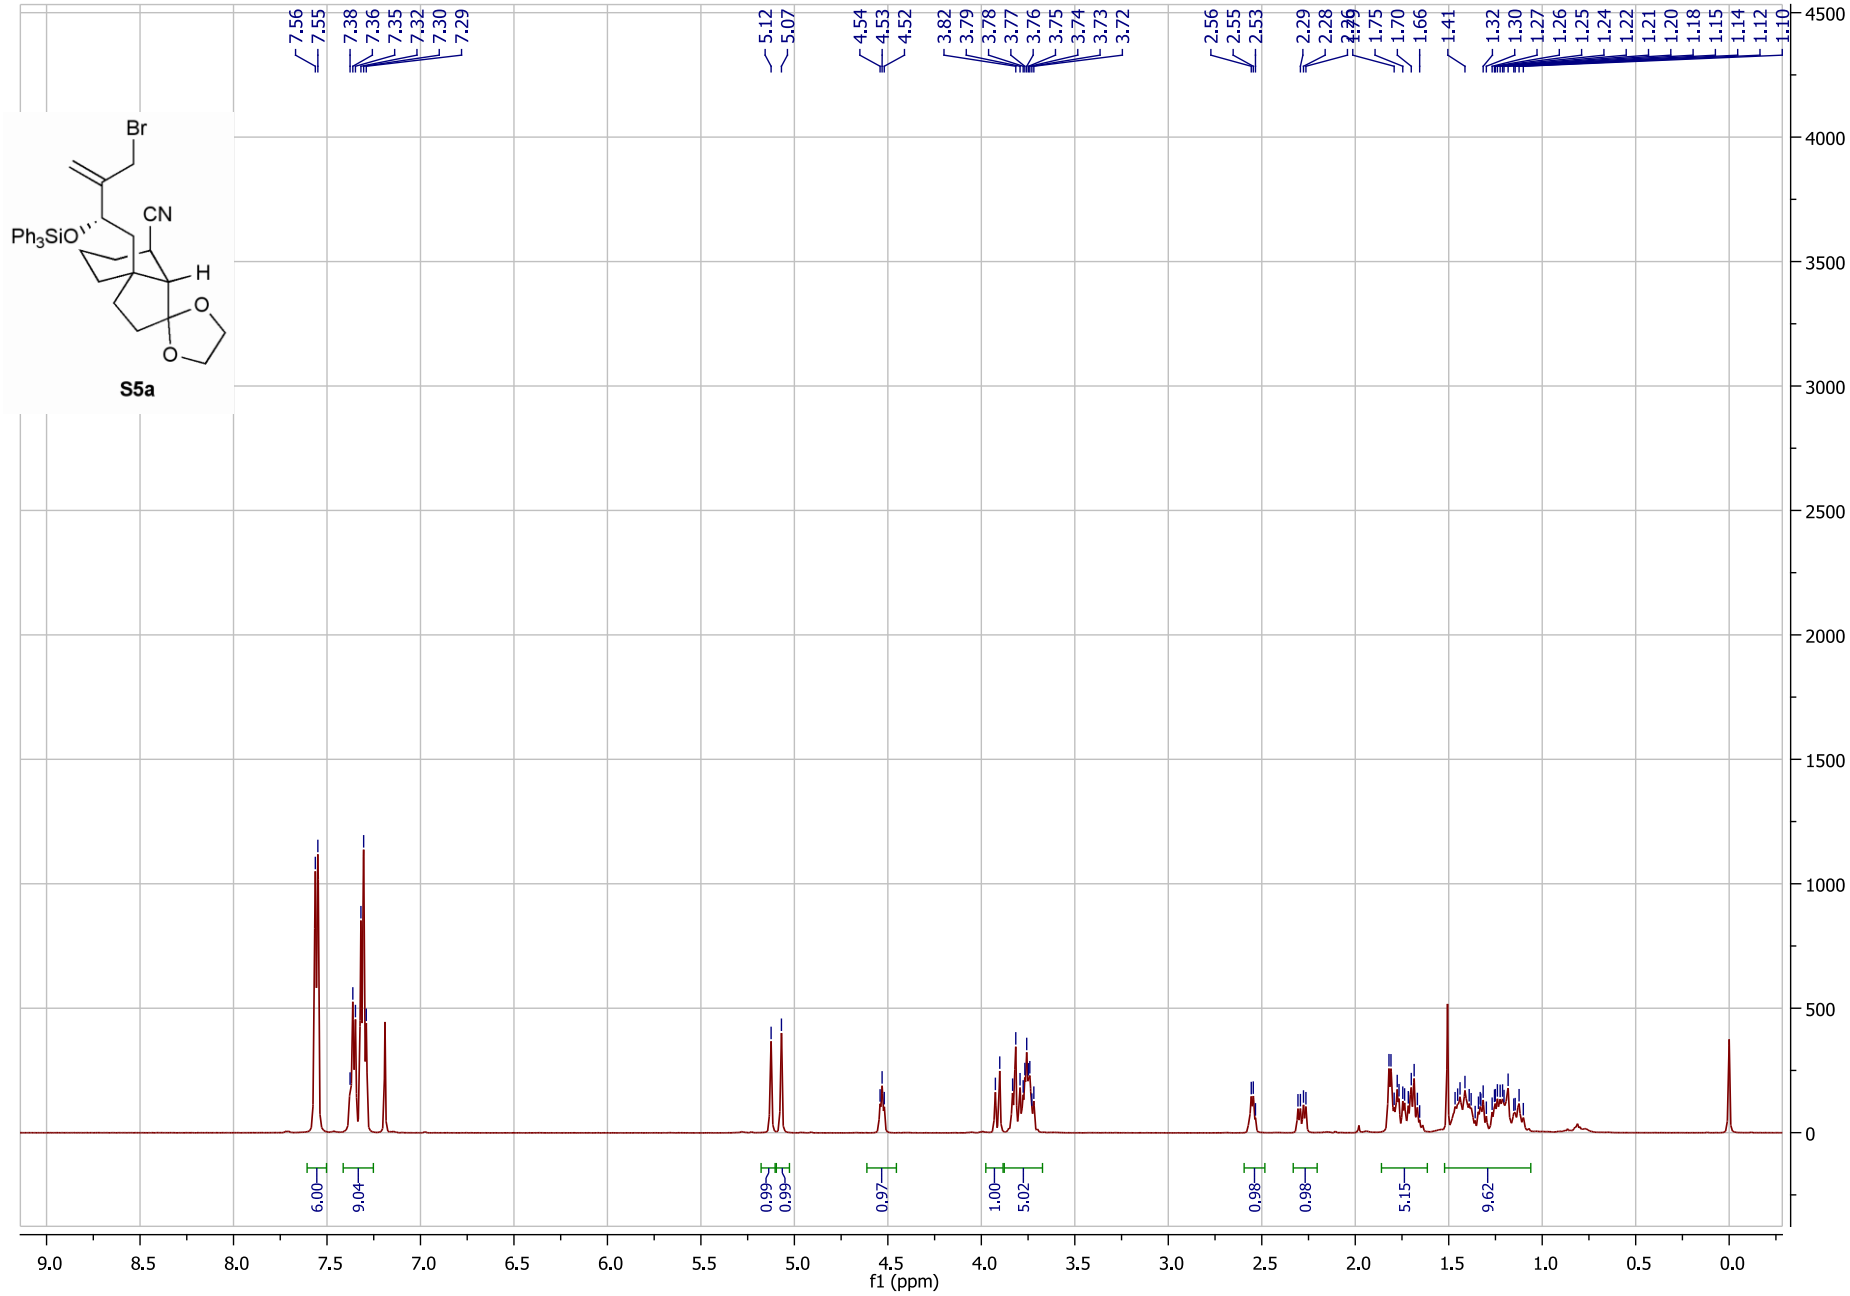

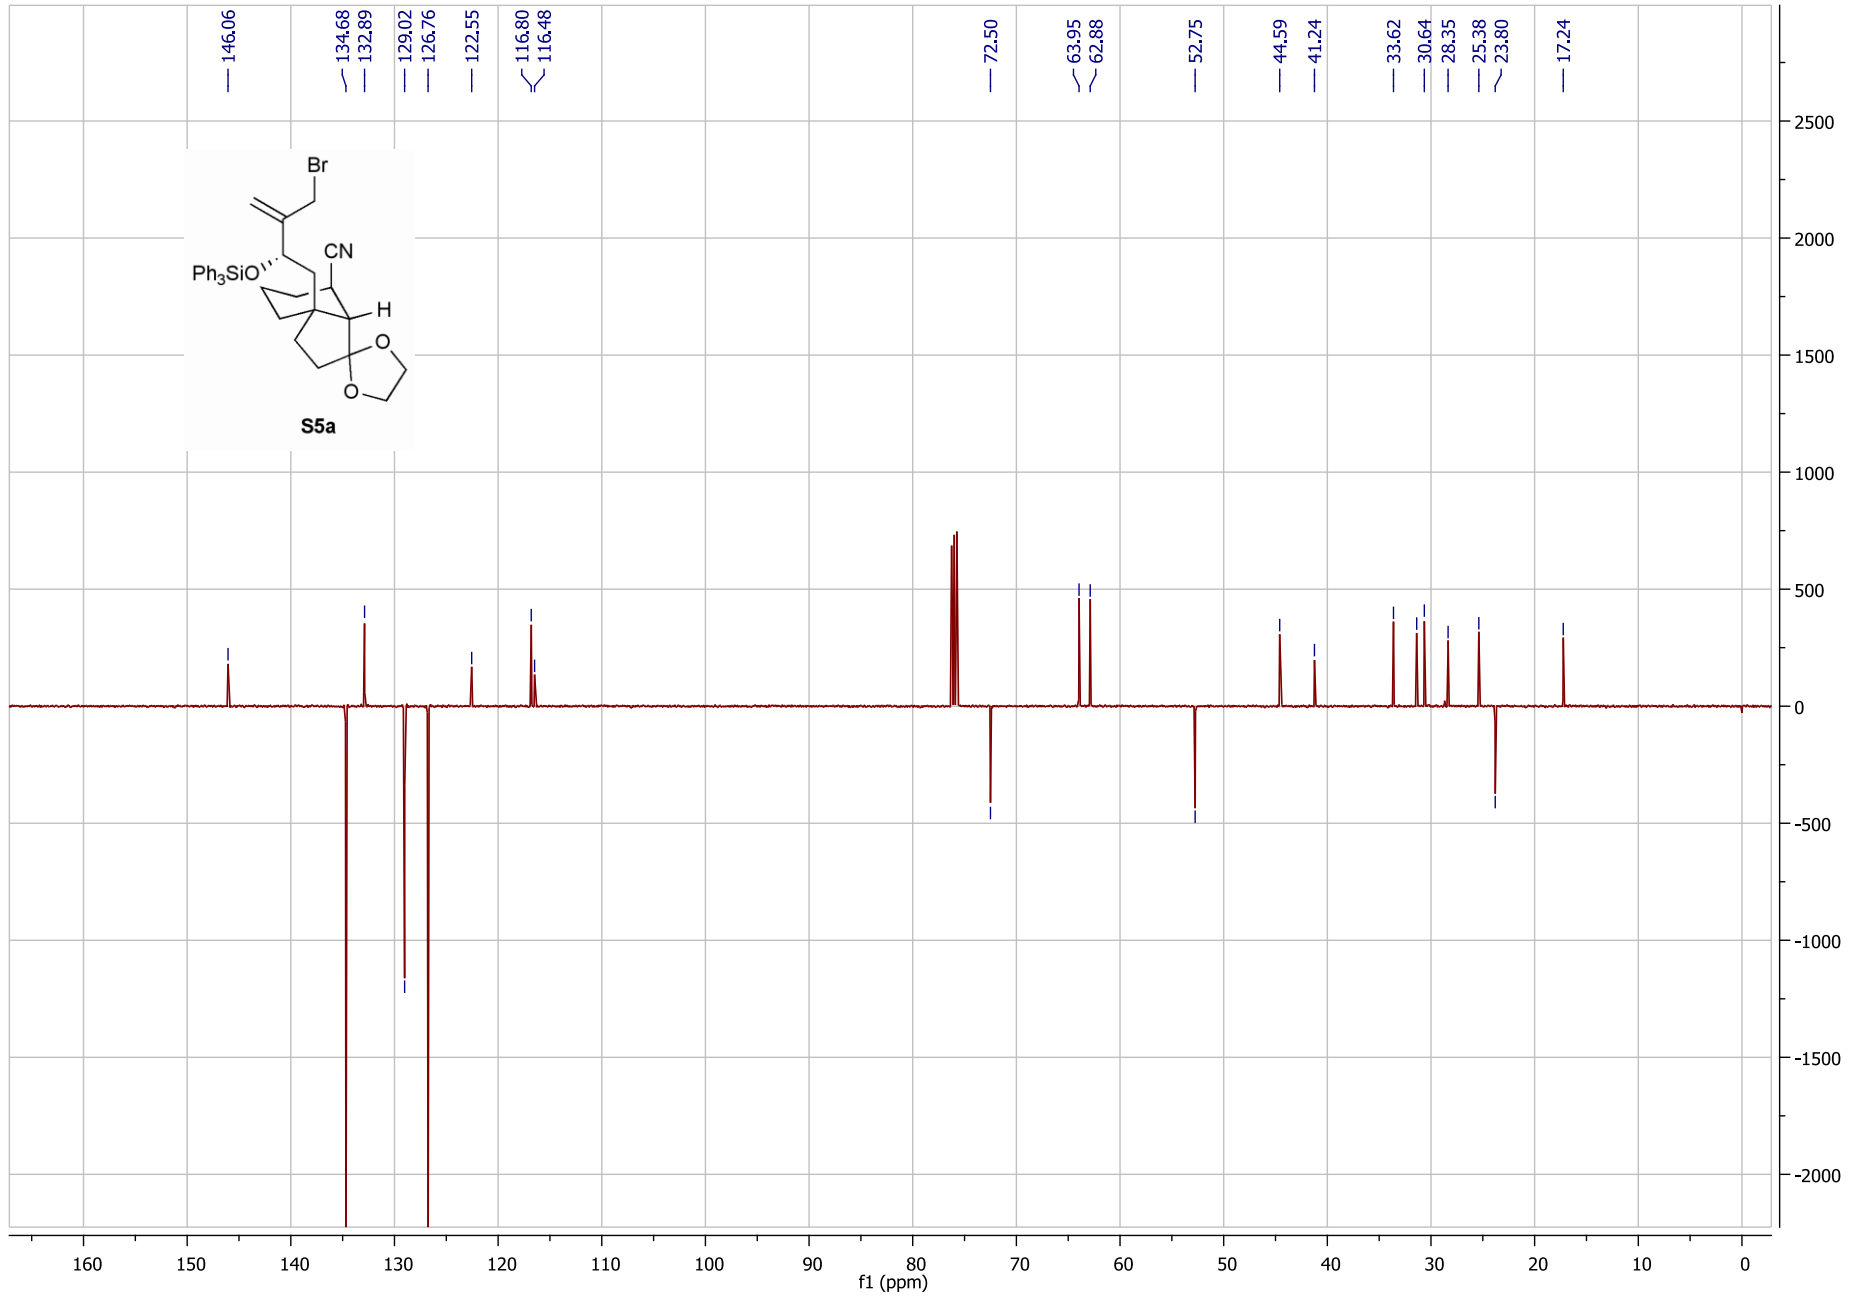

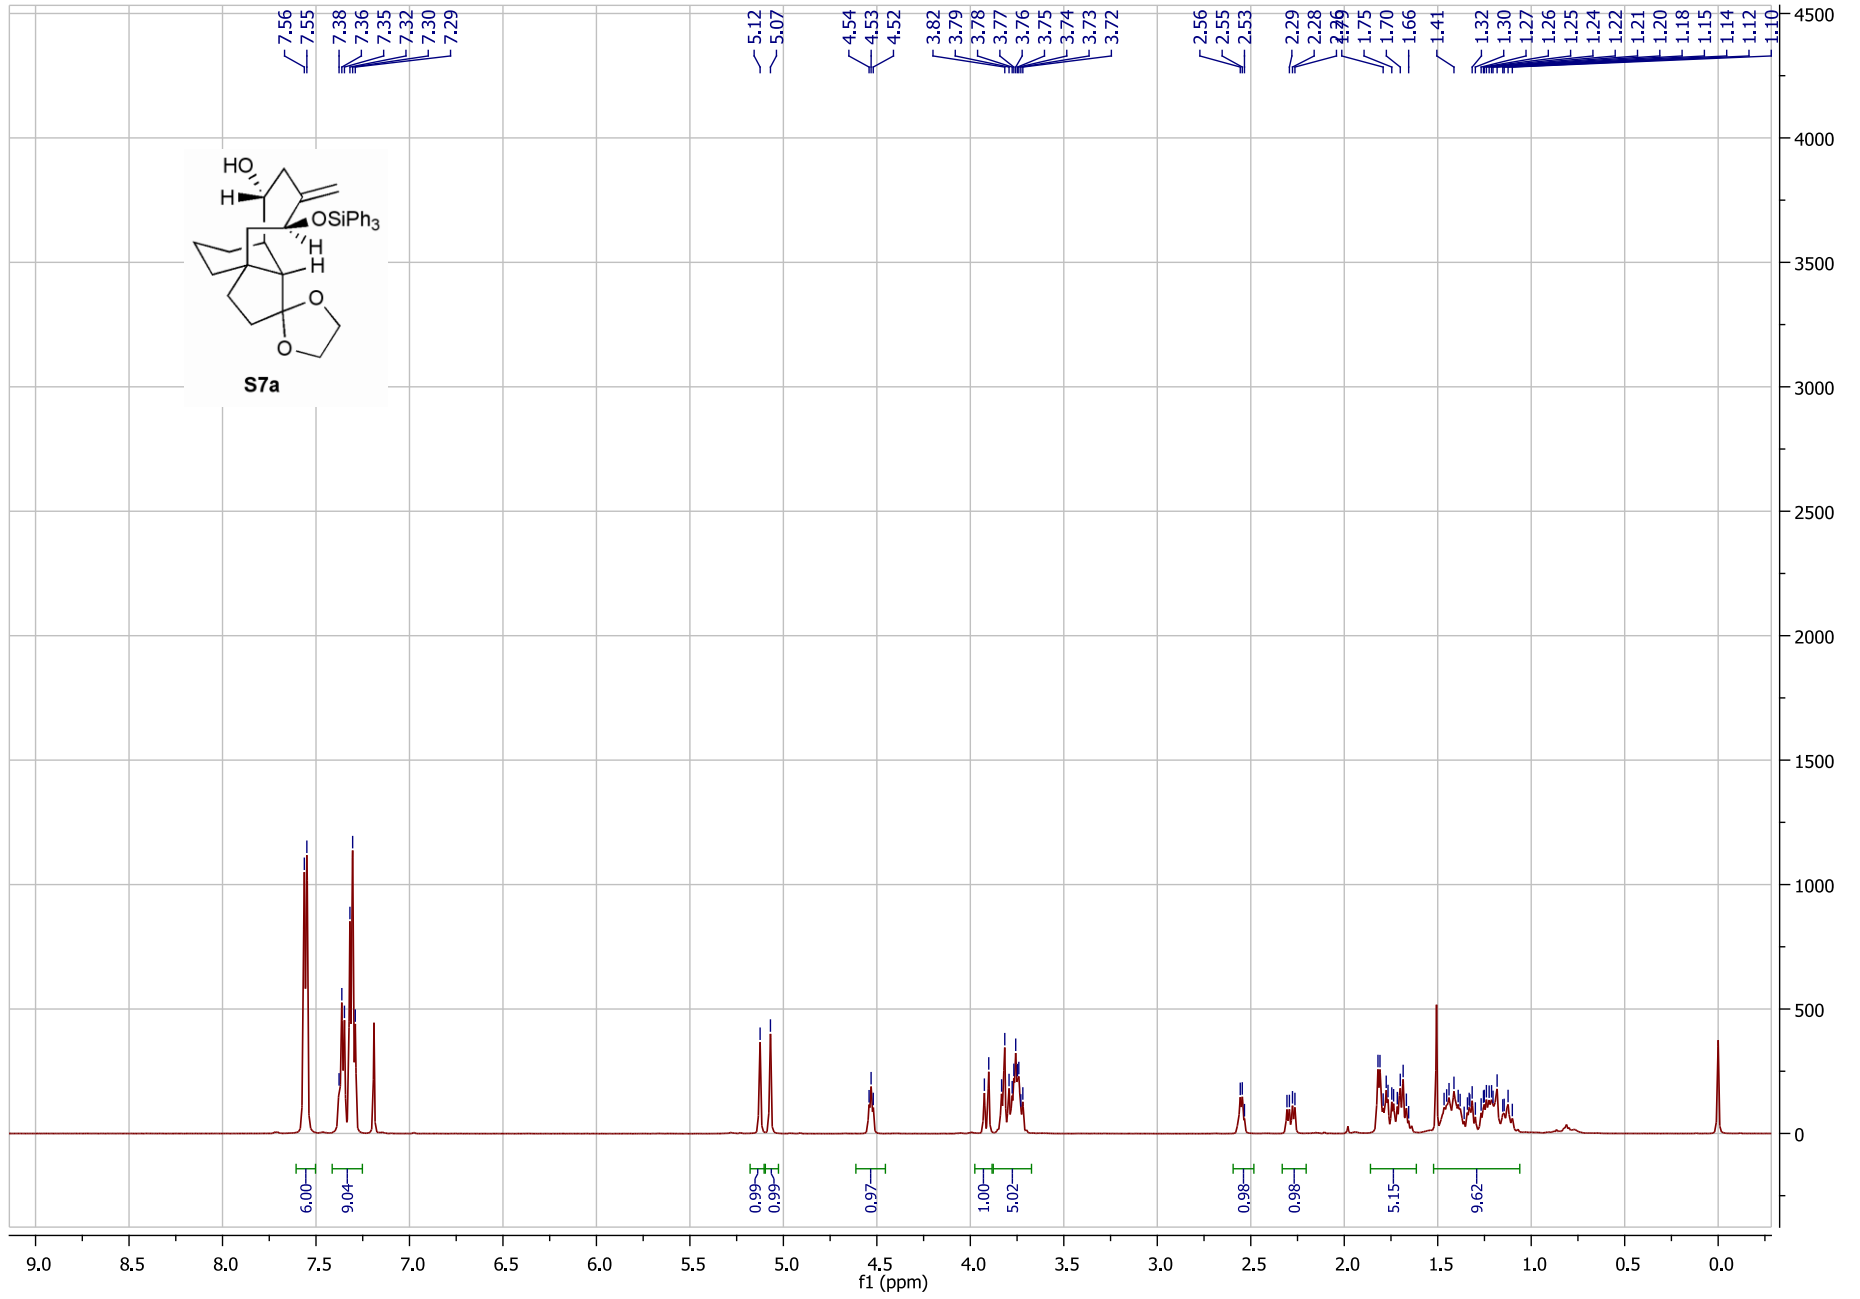



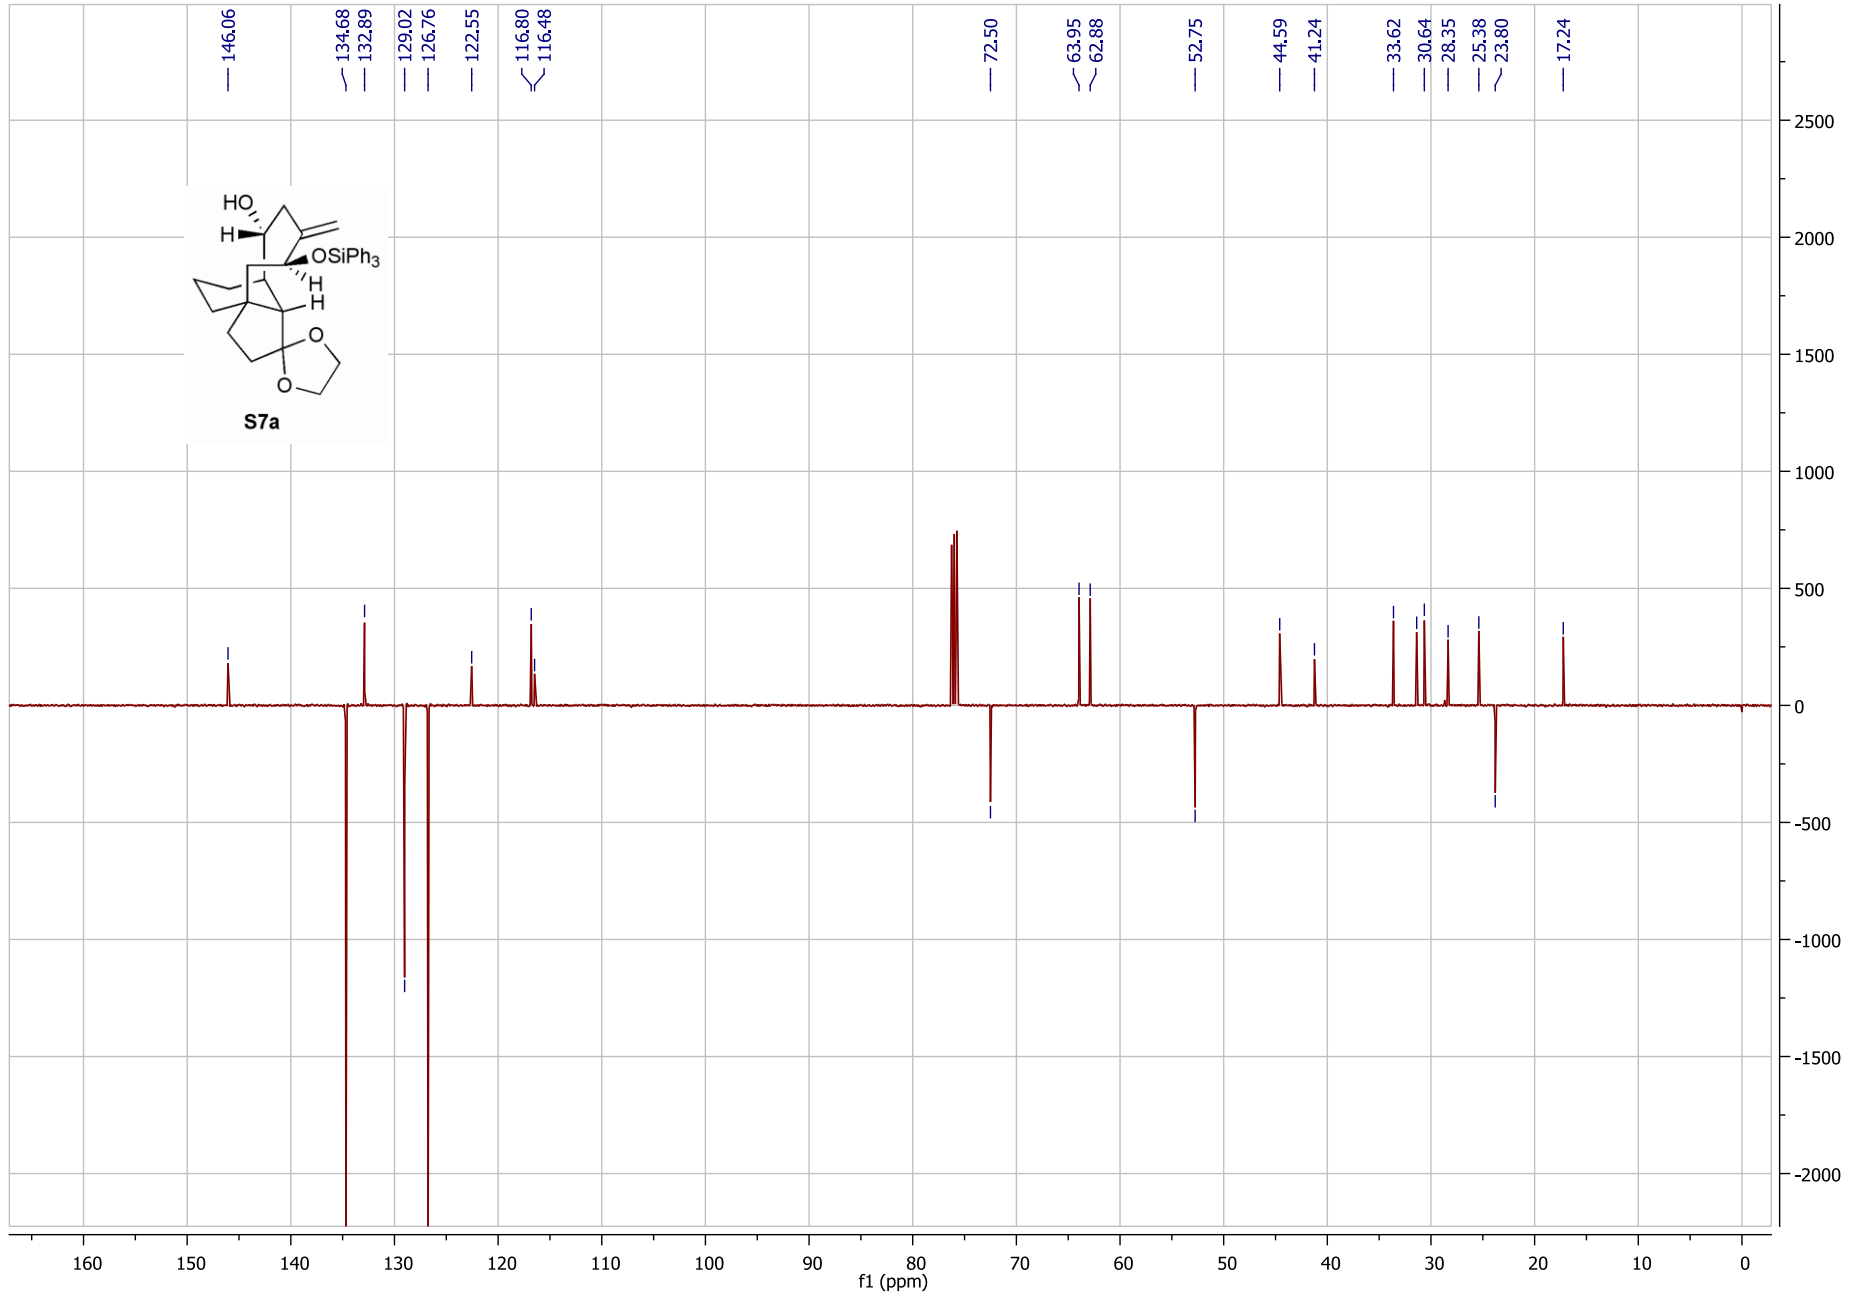

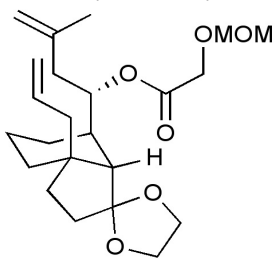

S10b

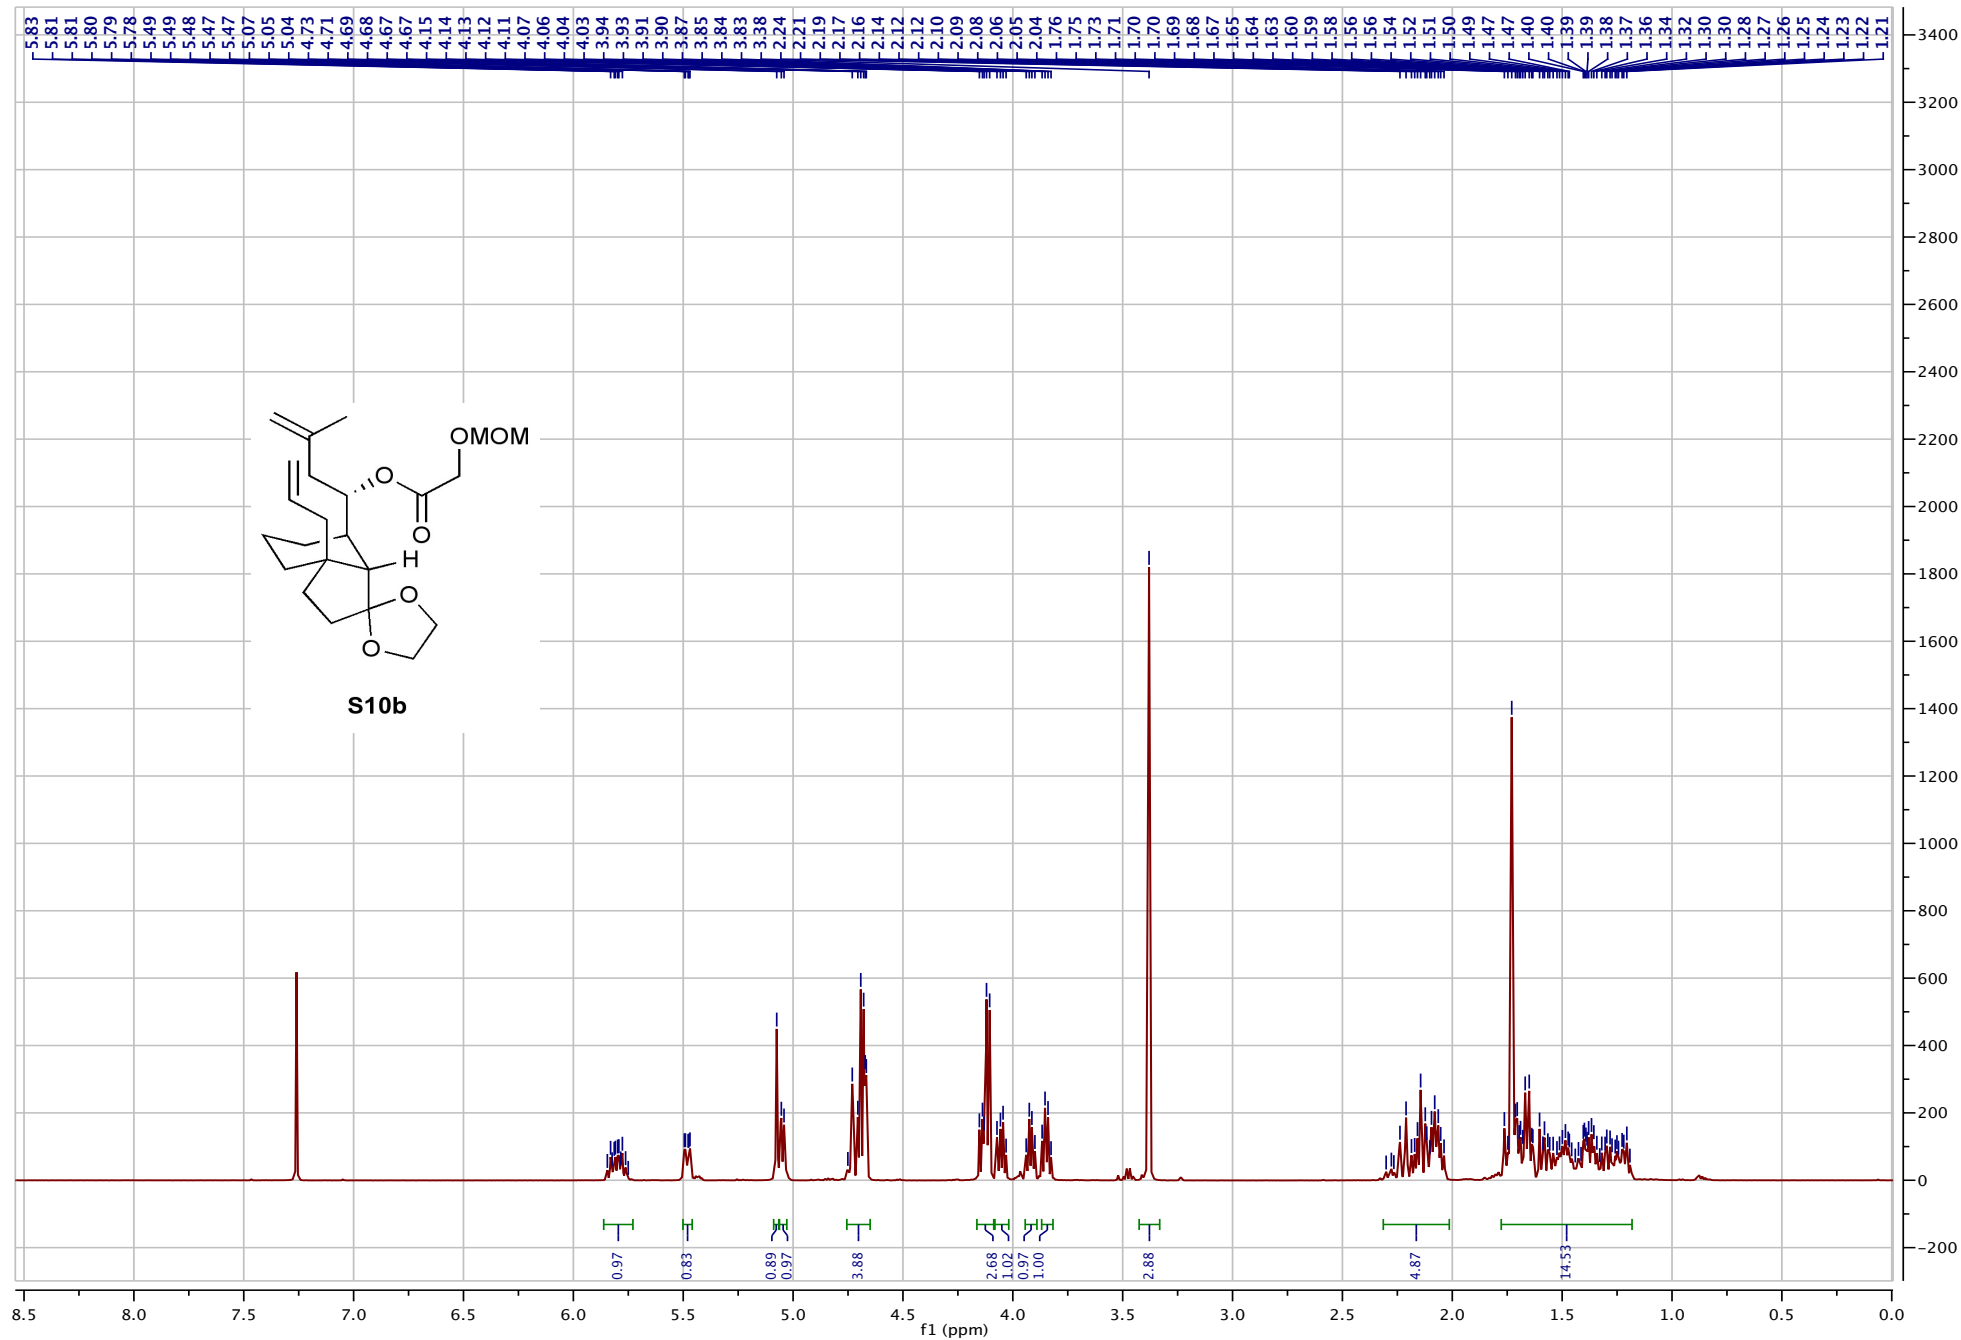

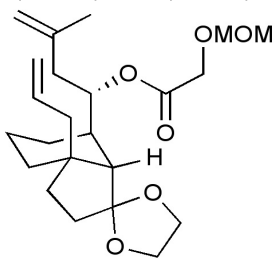

S10b

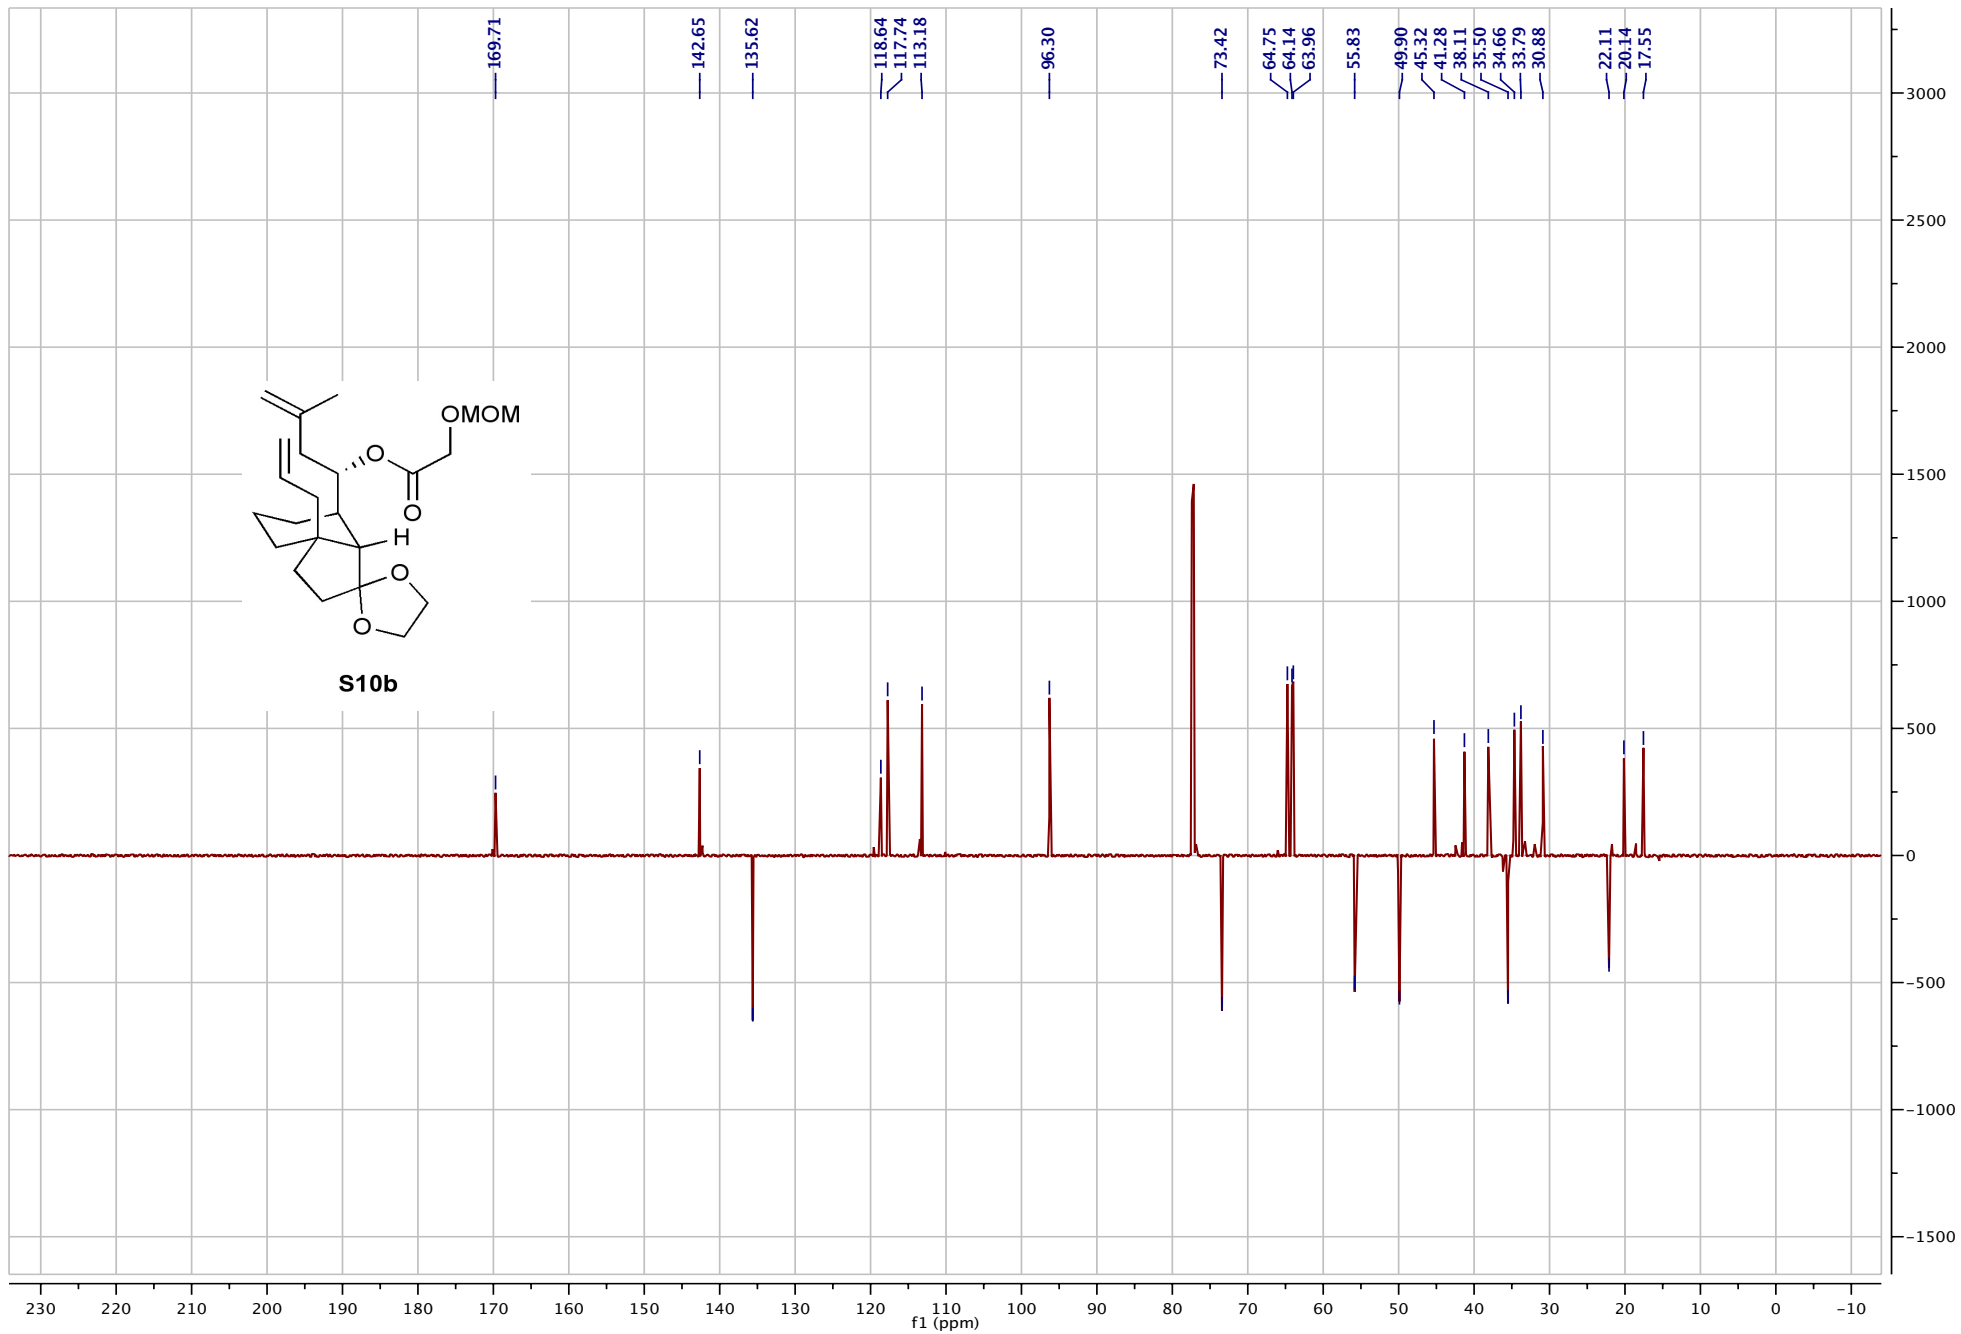

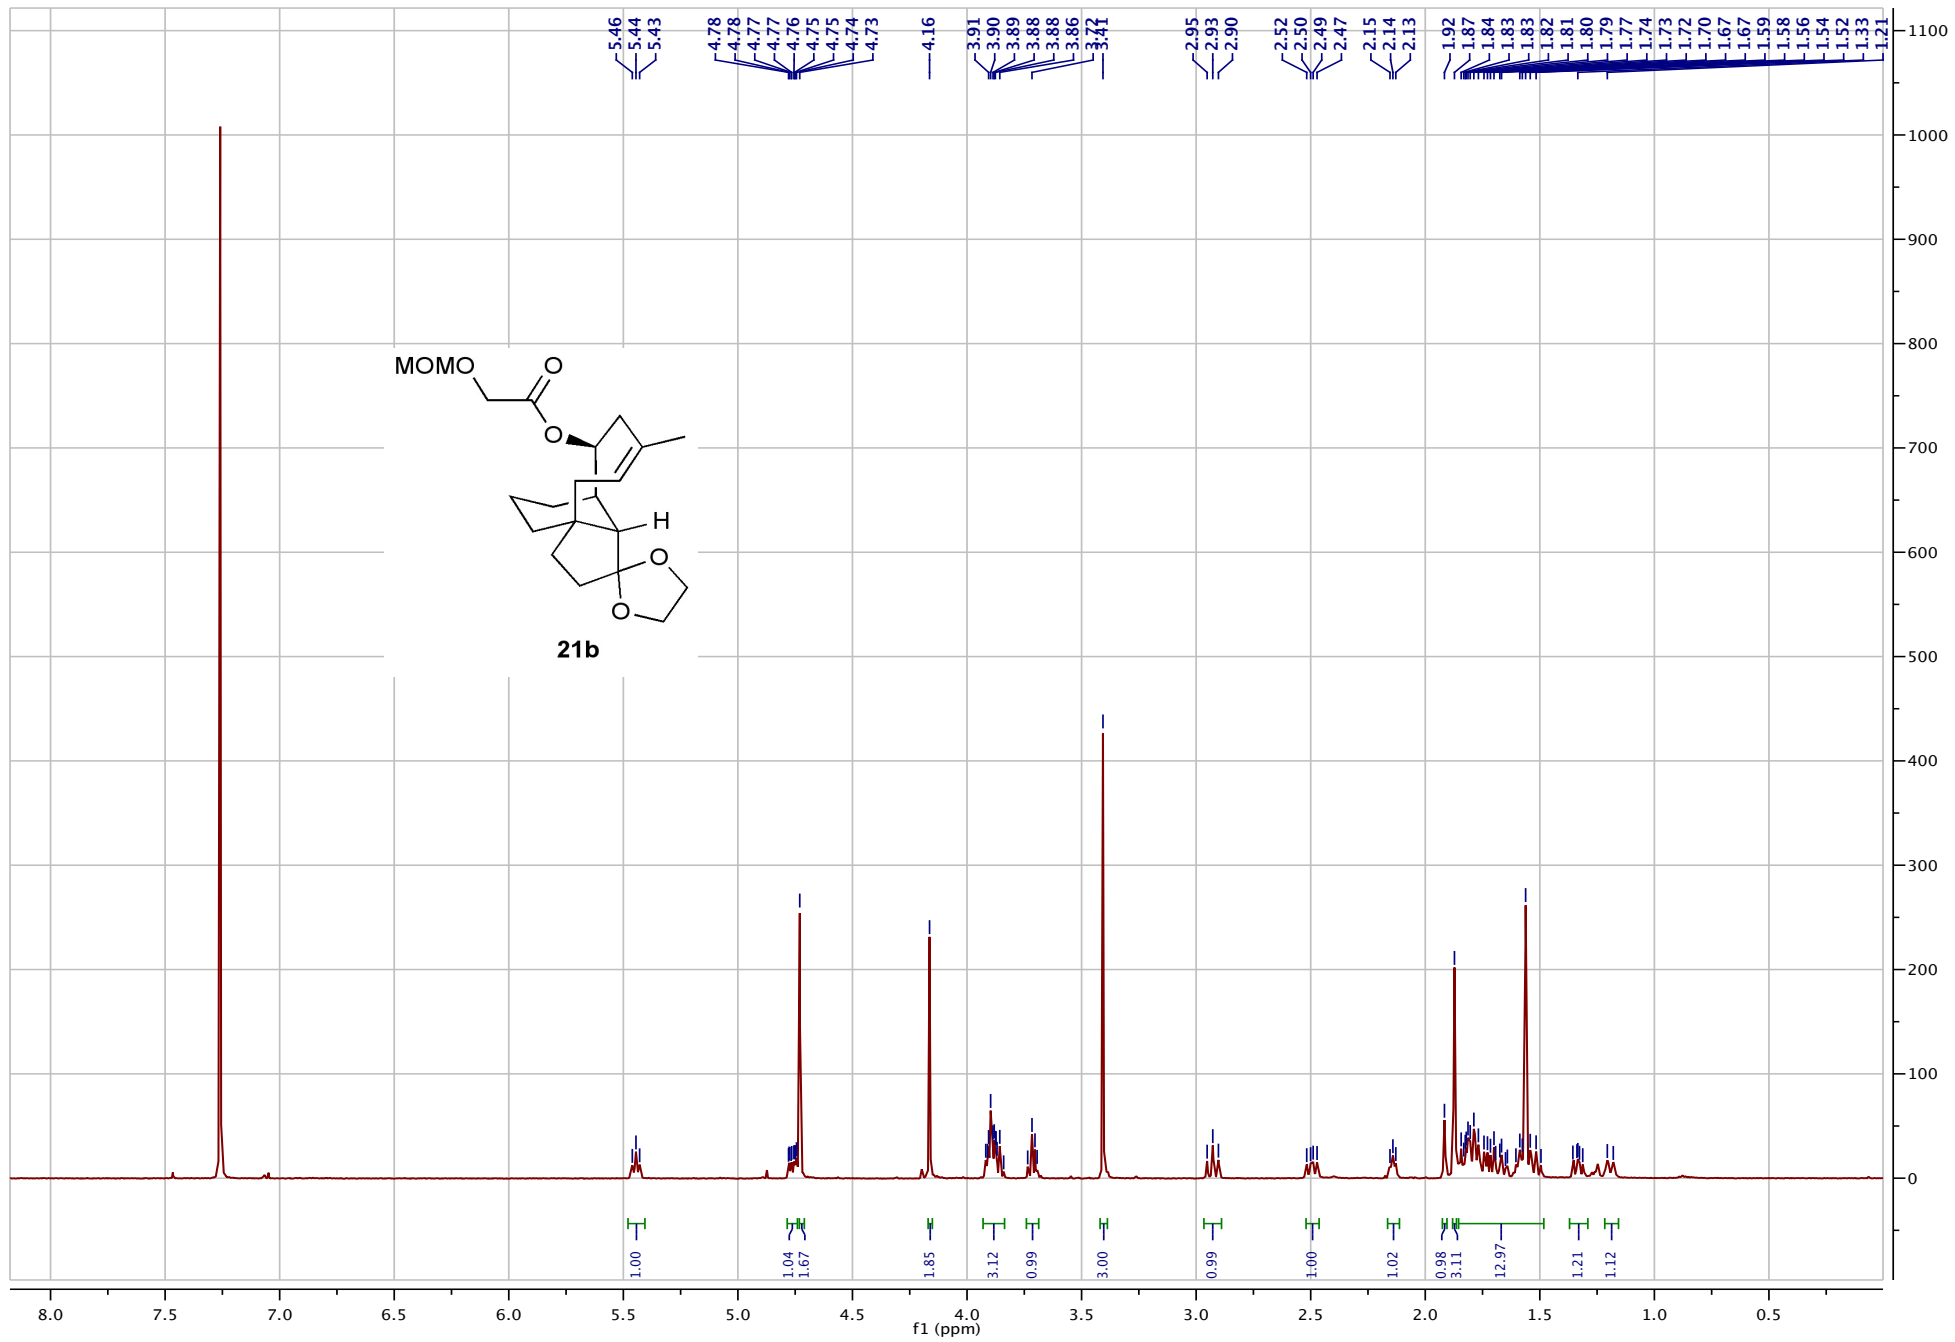

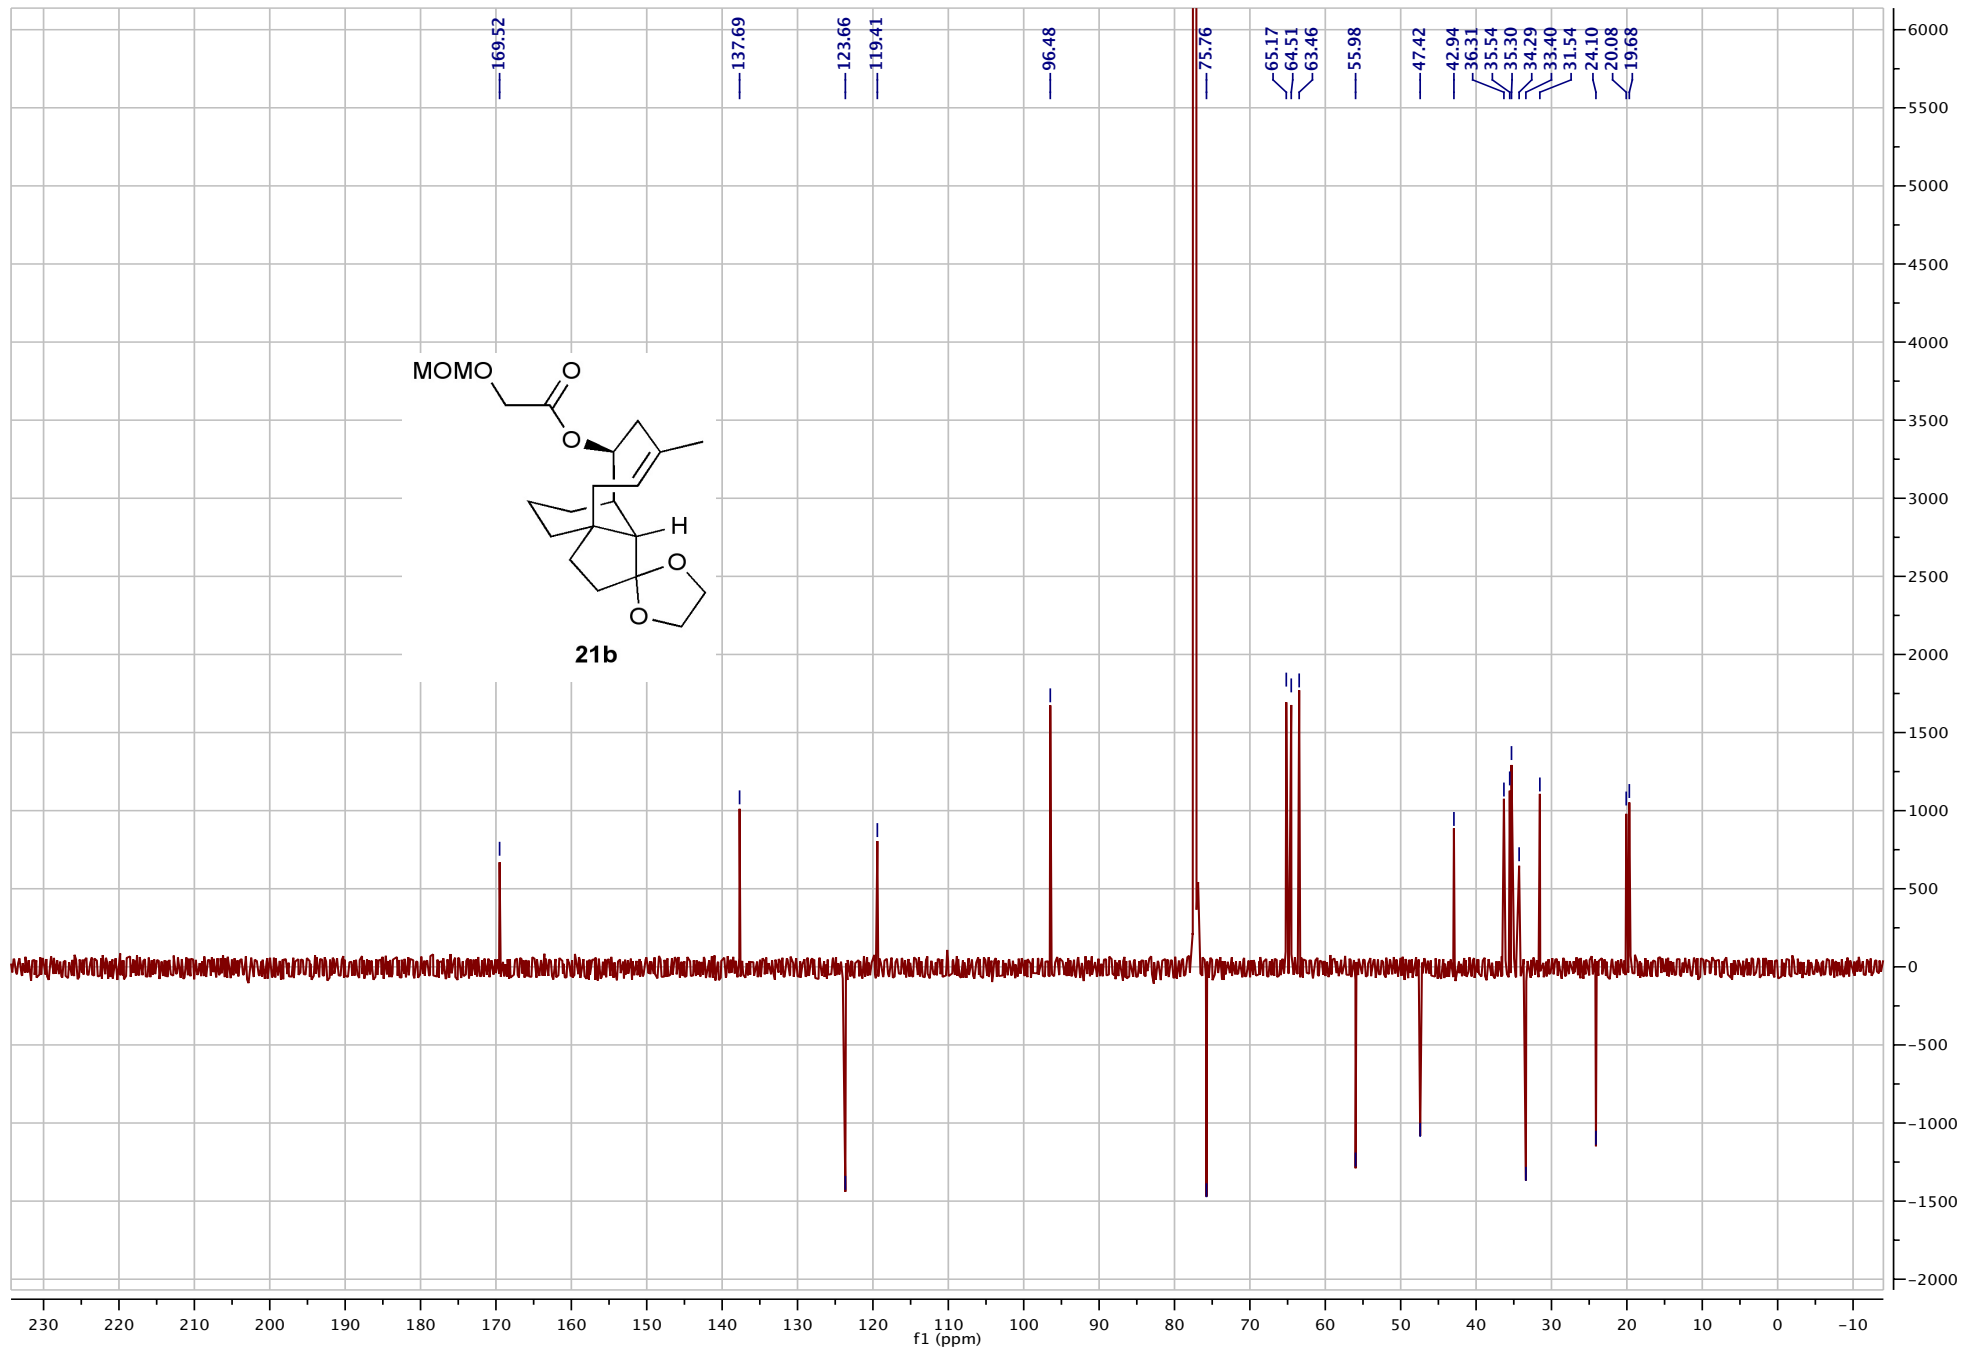

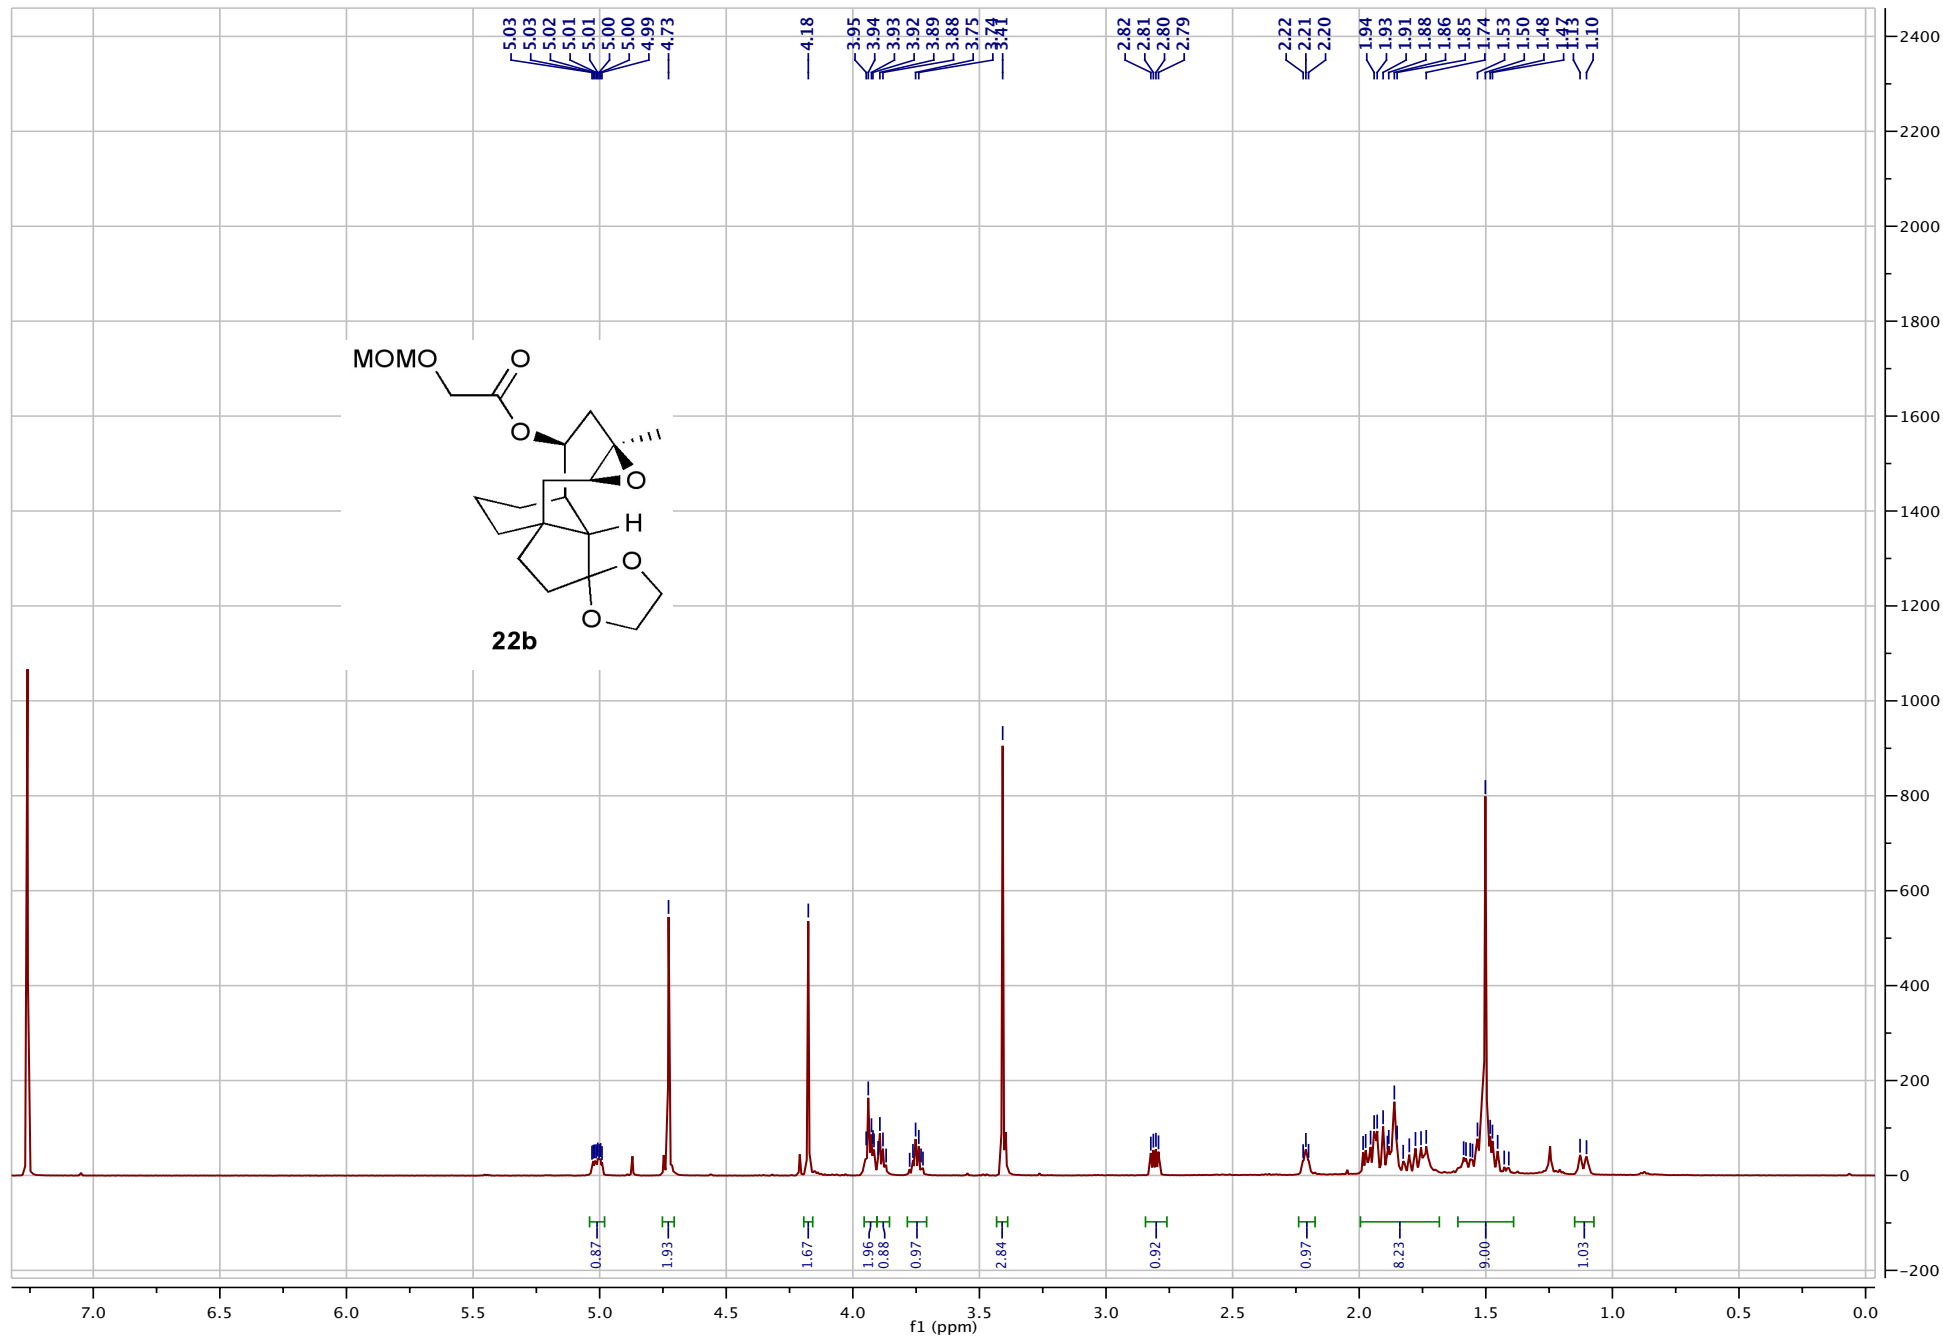

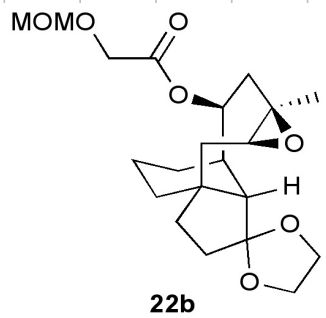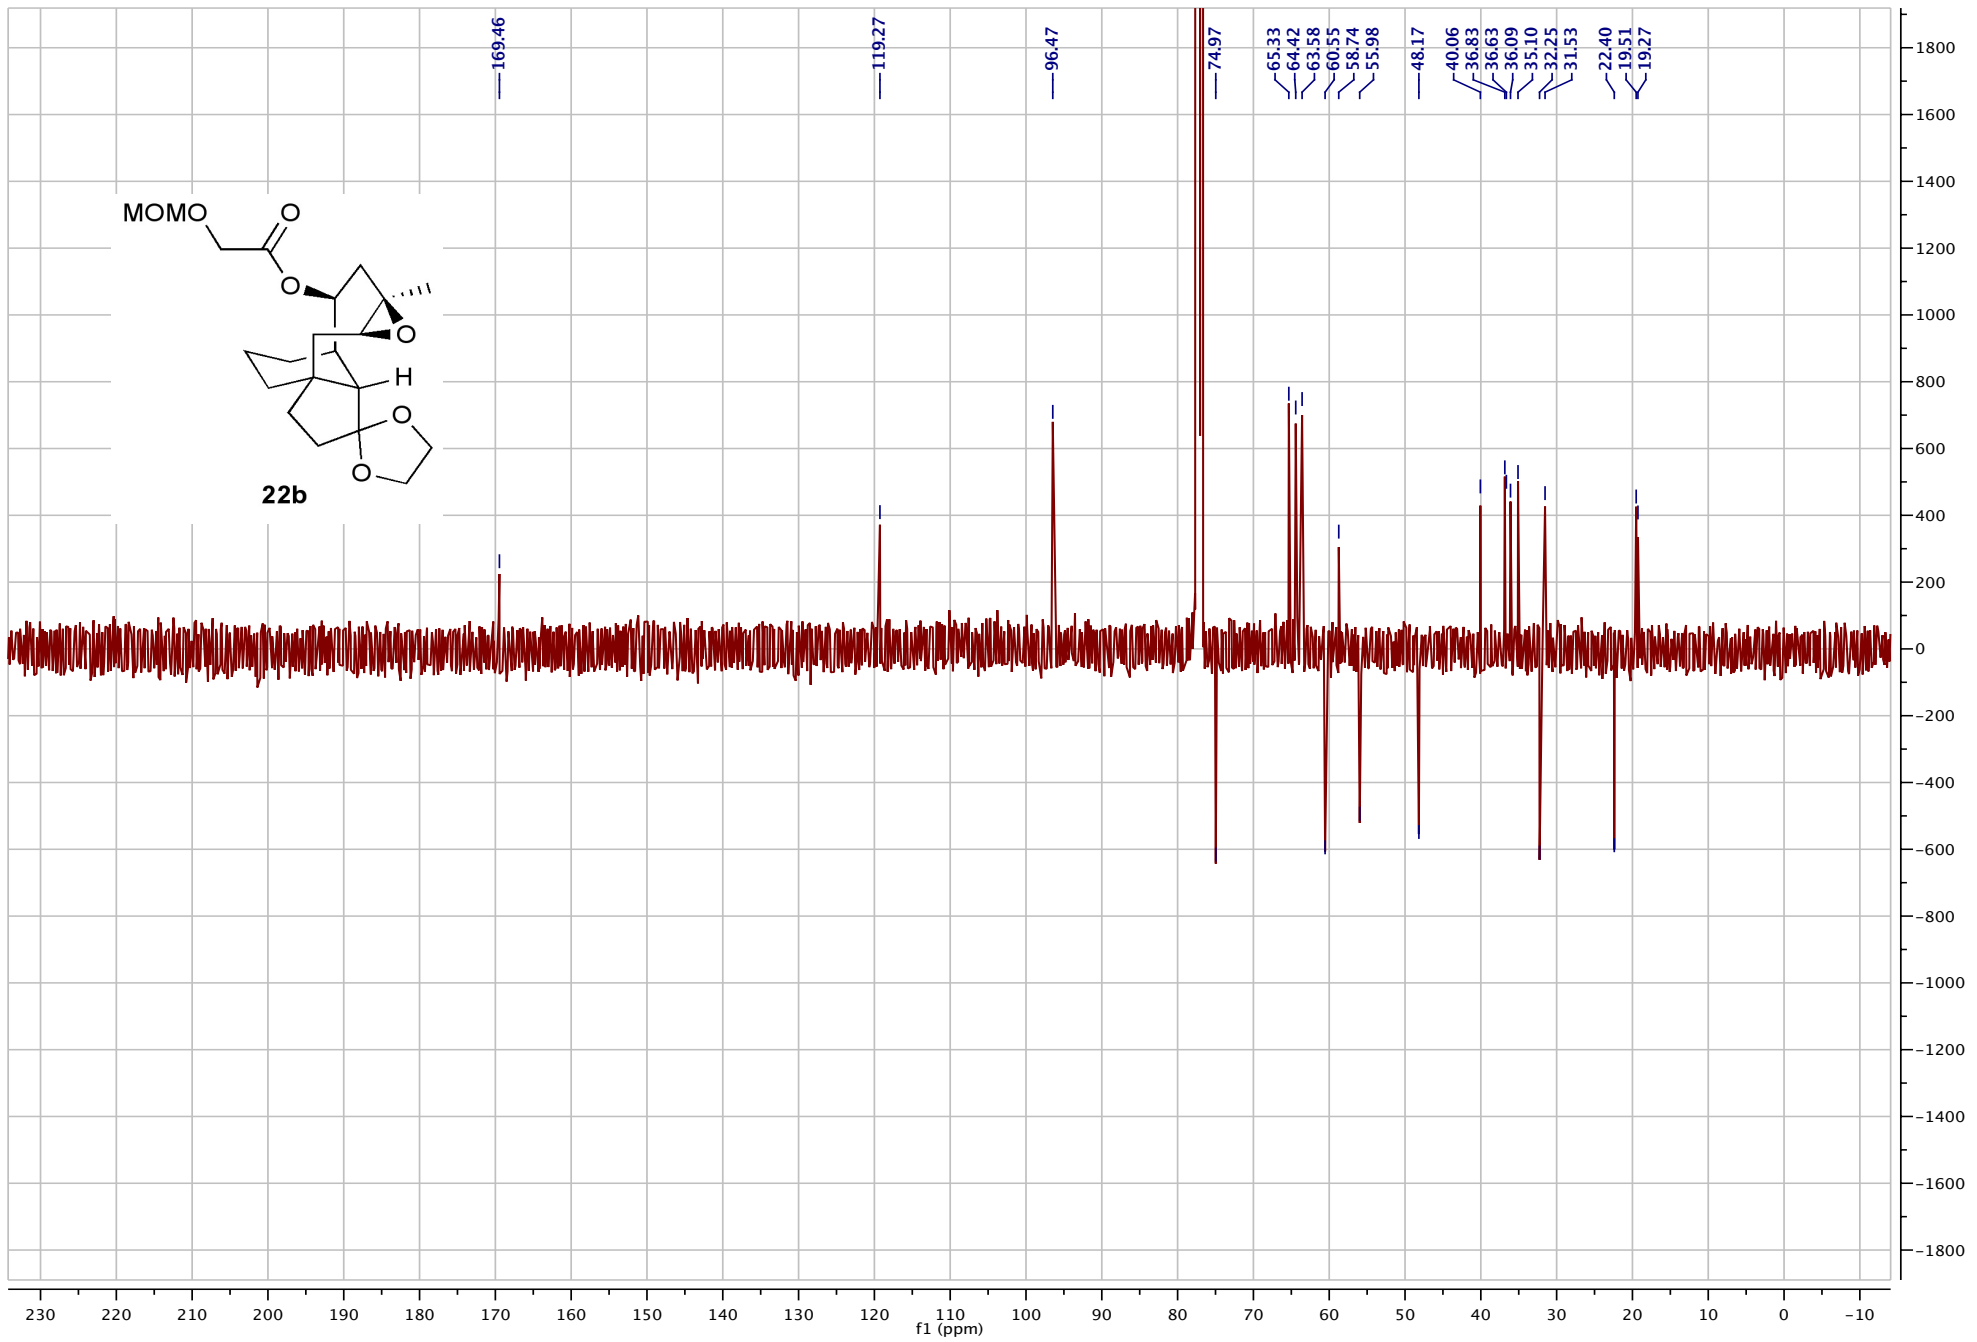

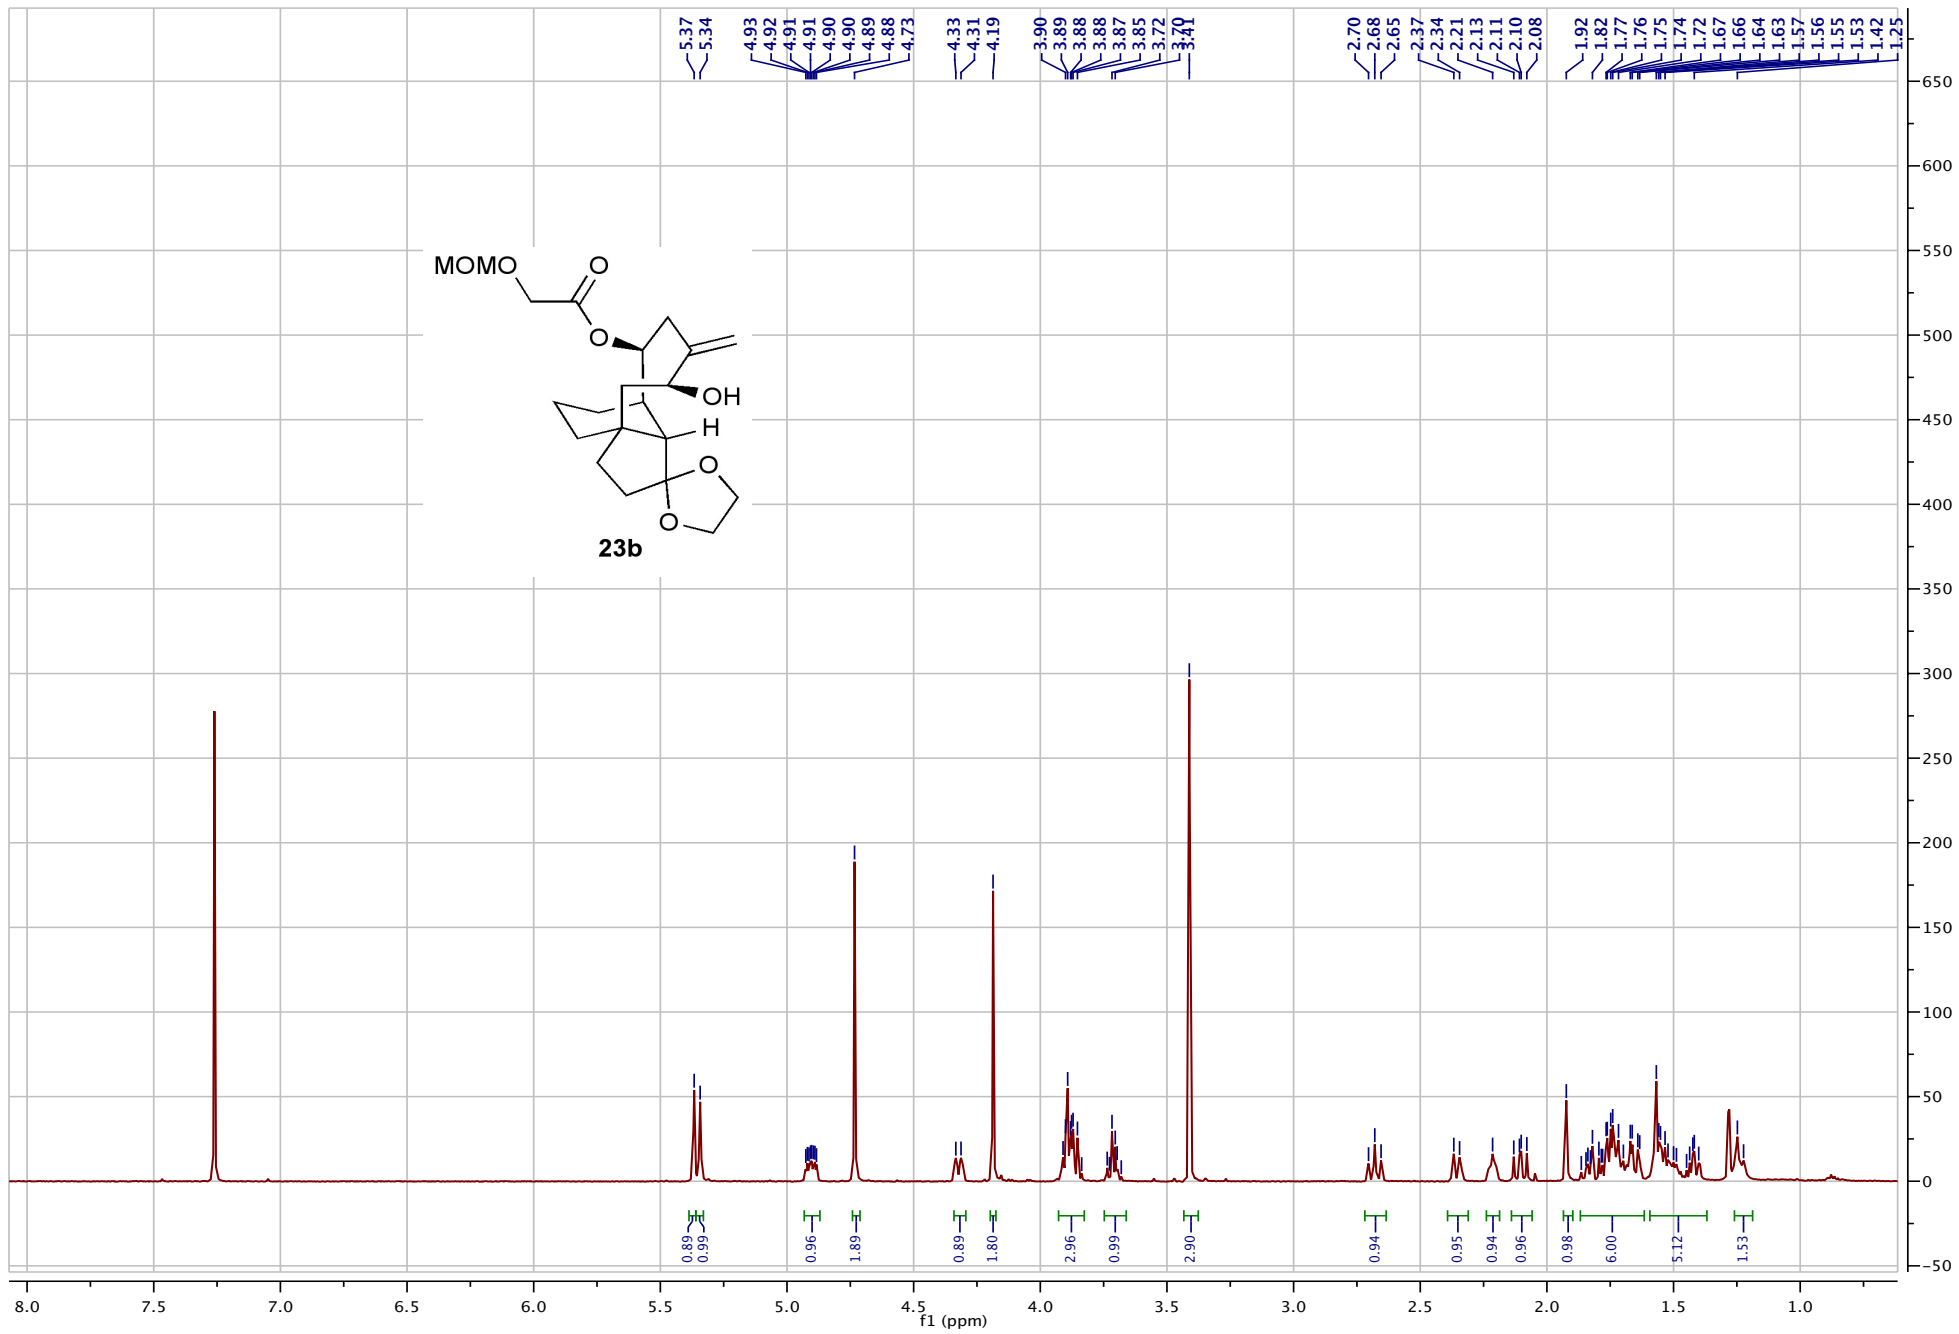



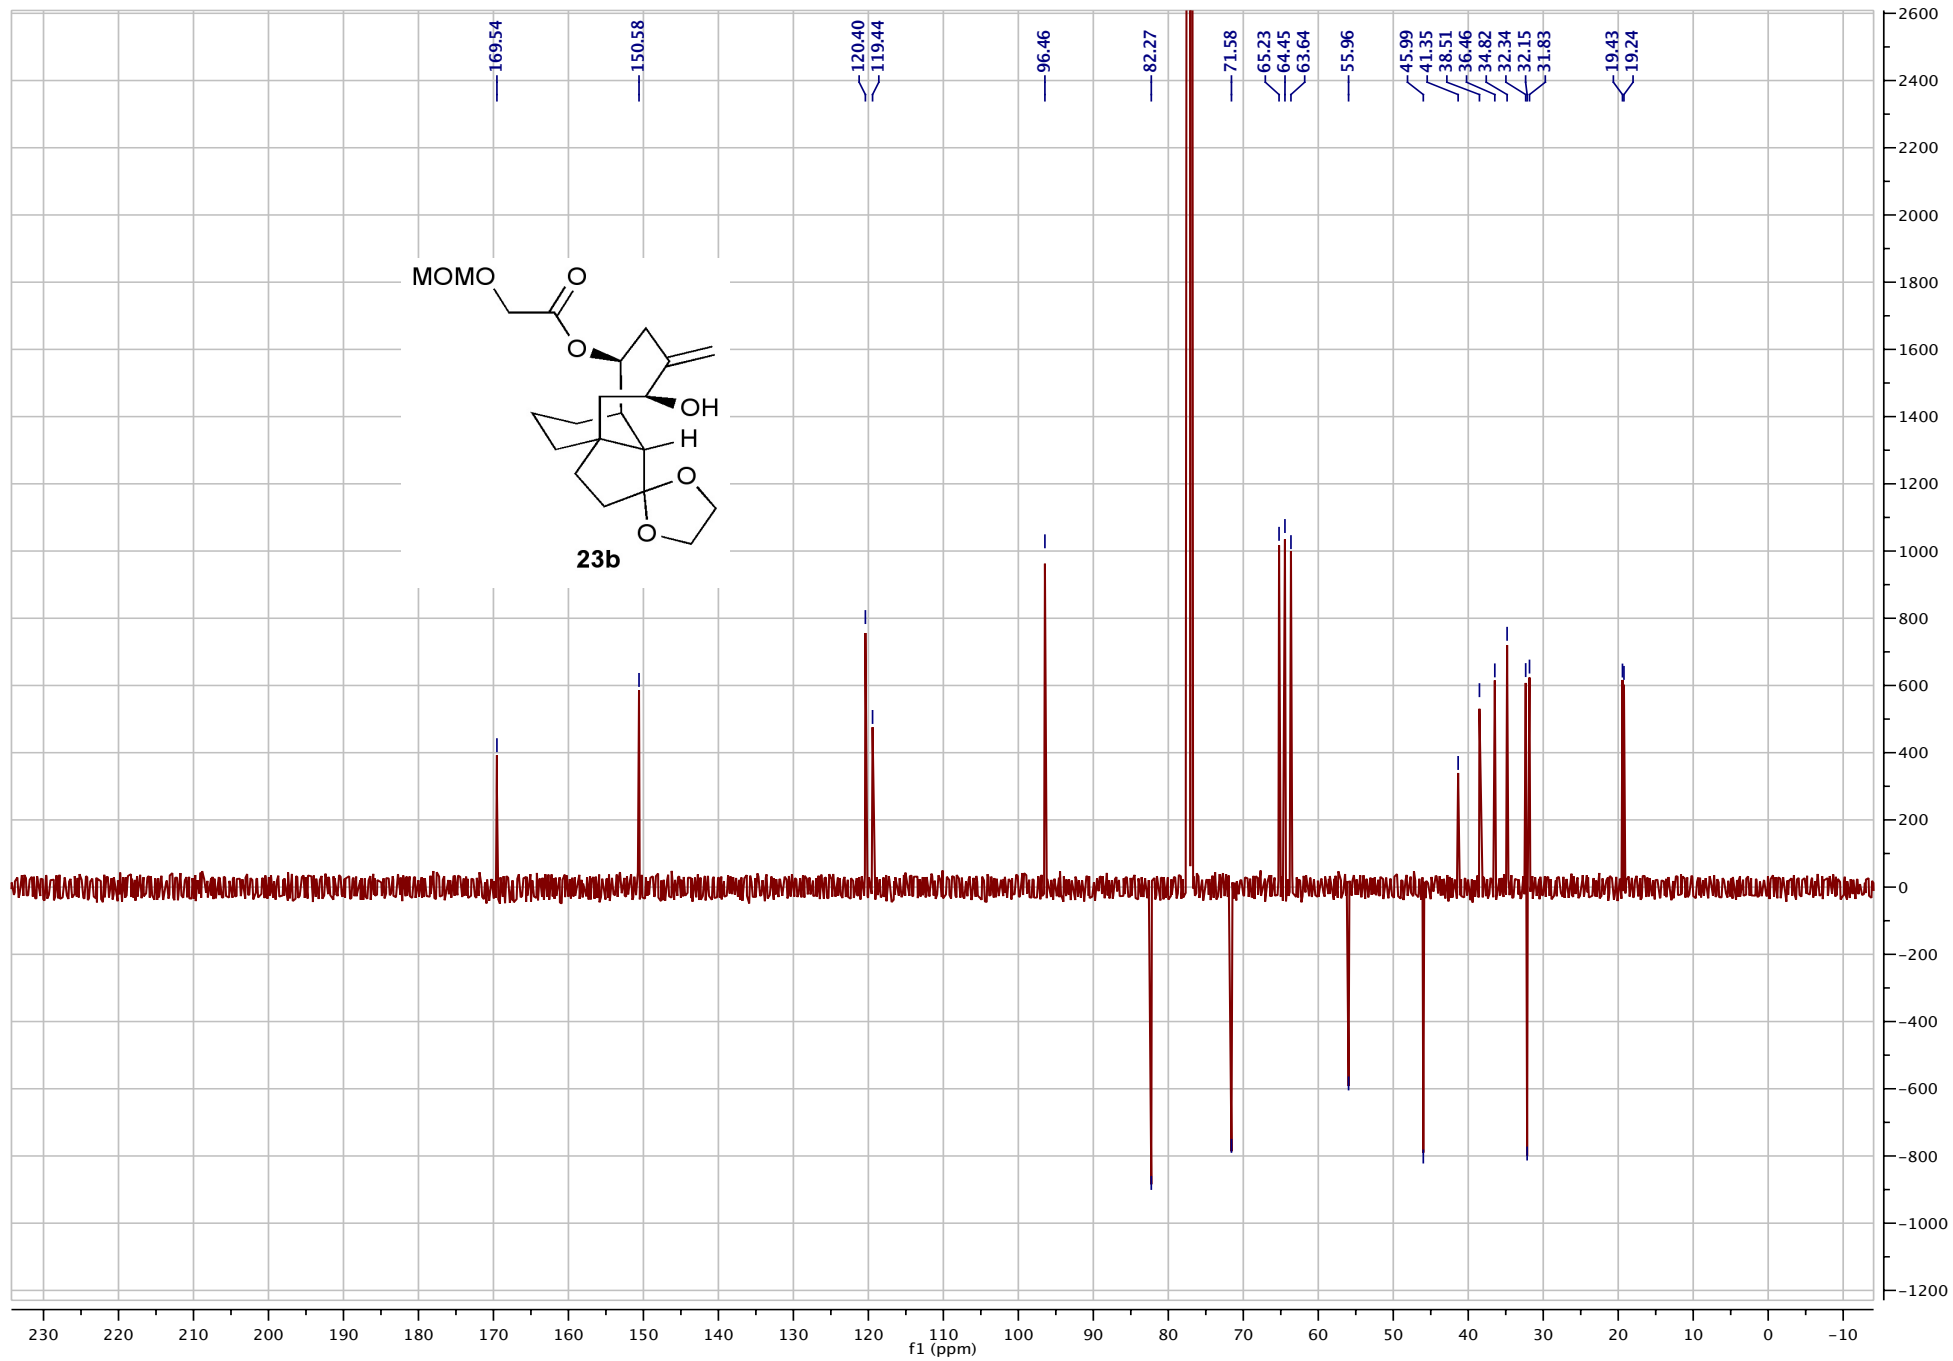

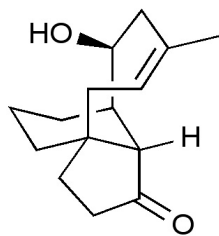

24

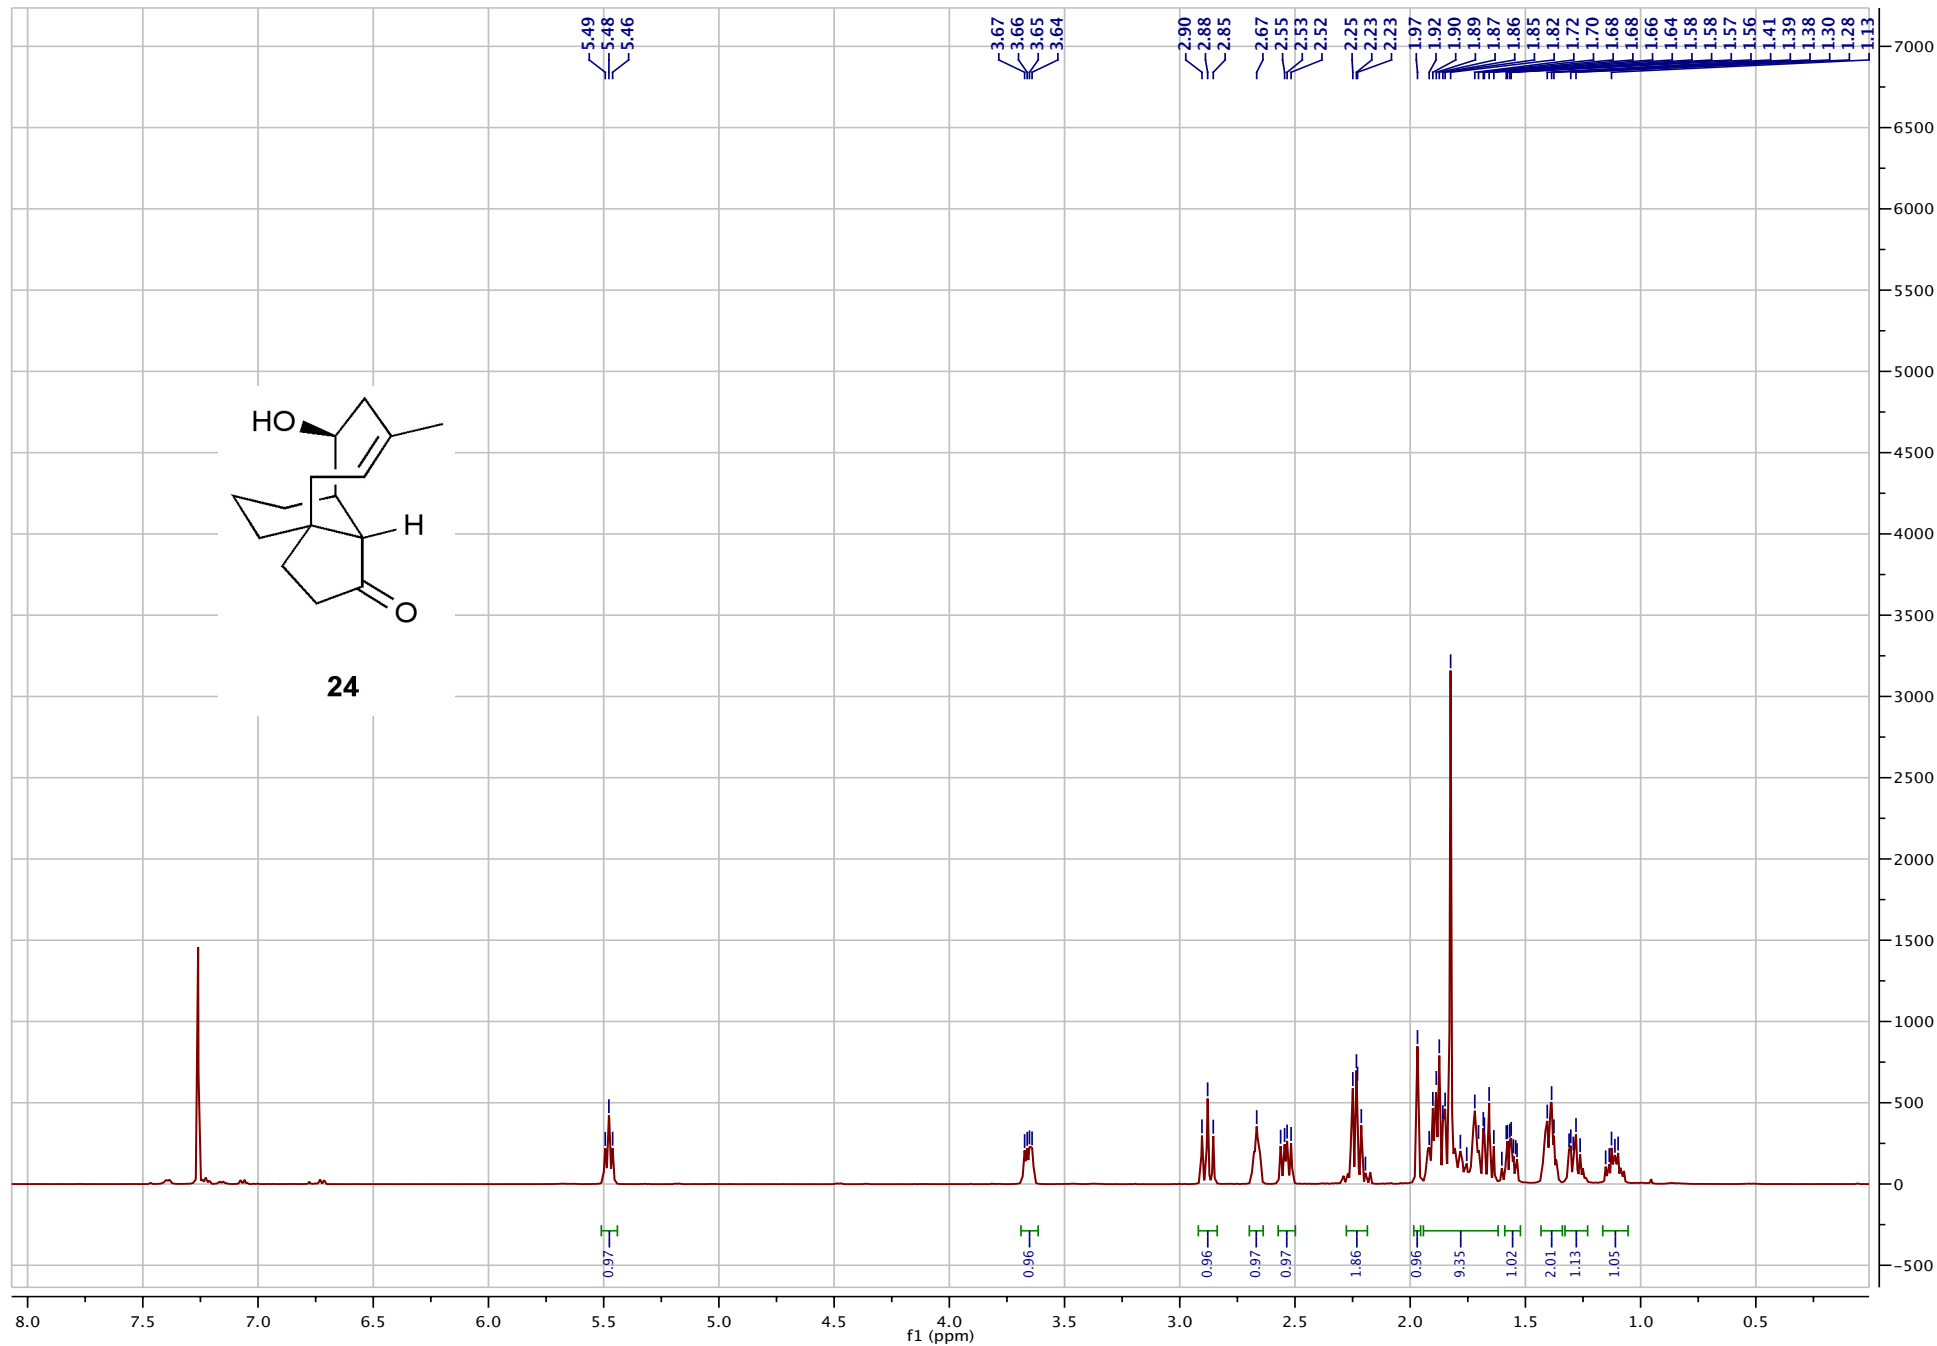

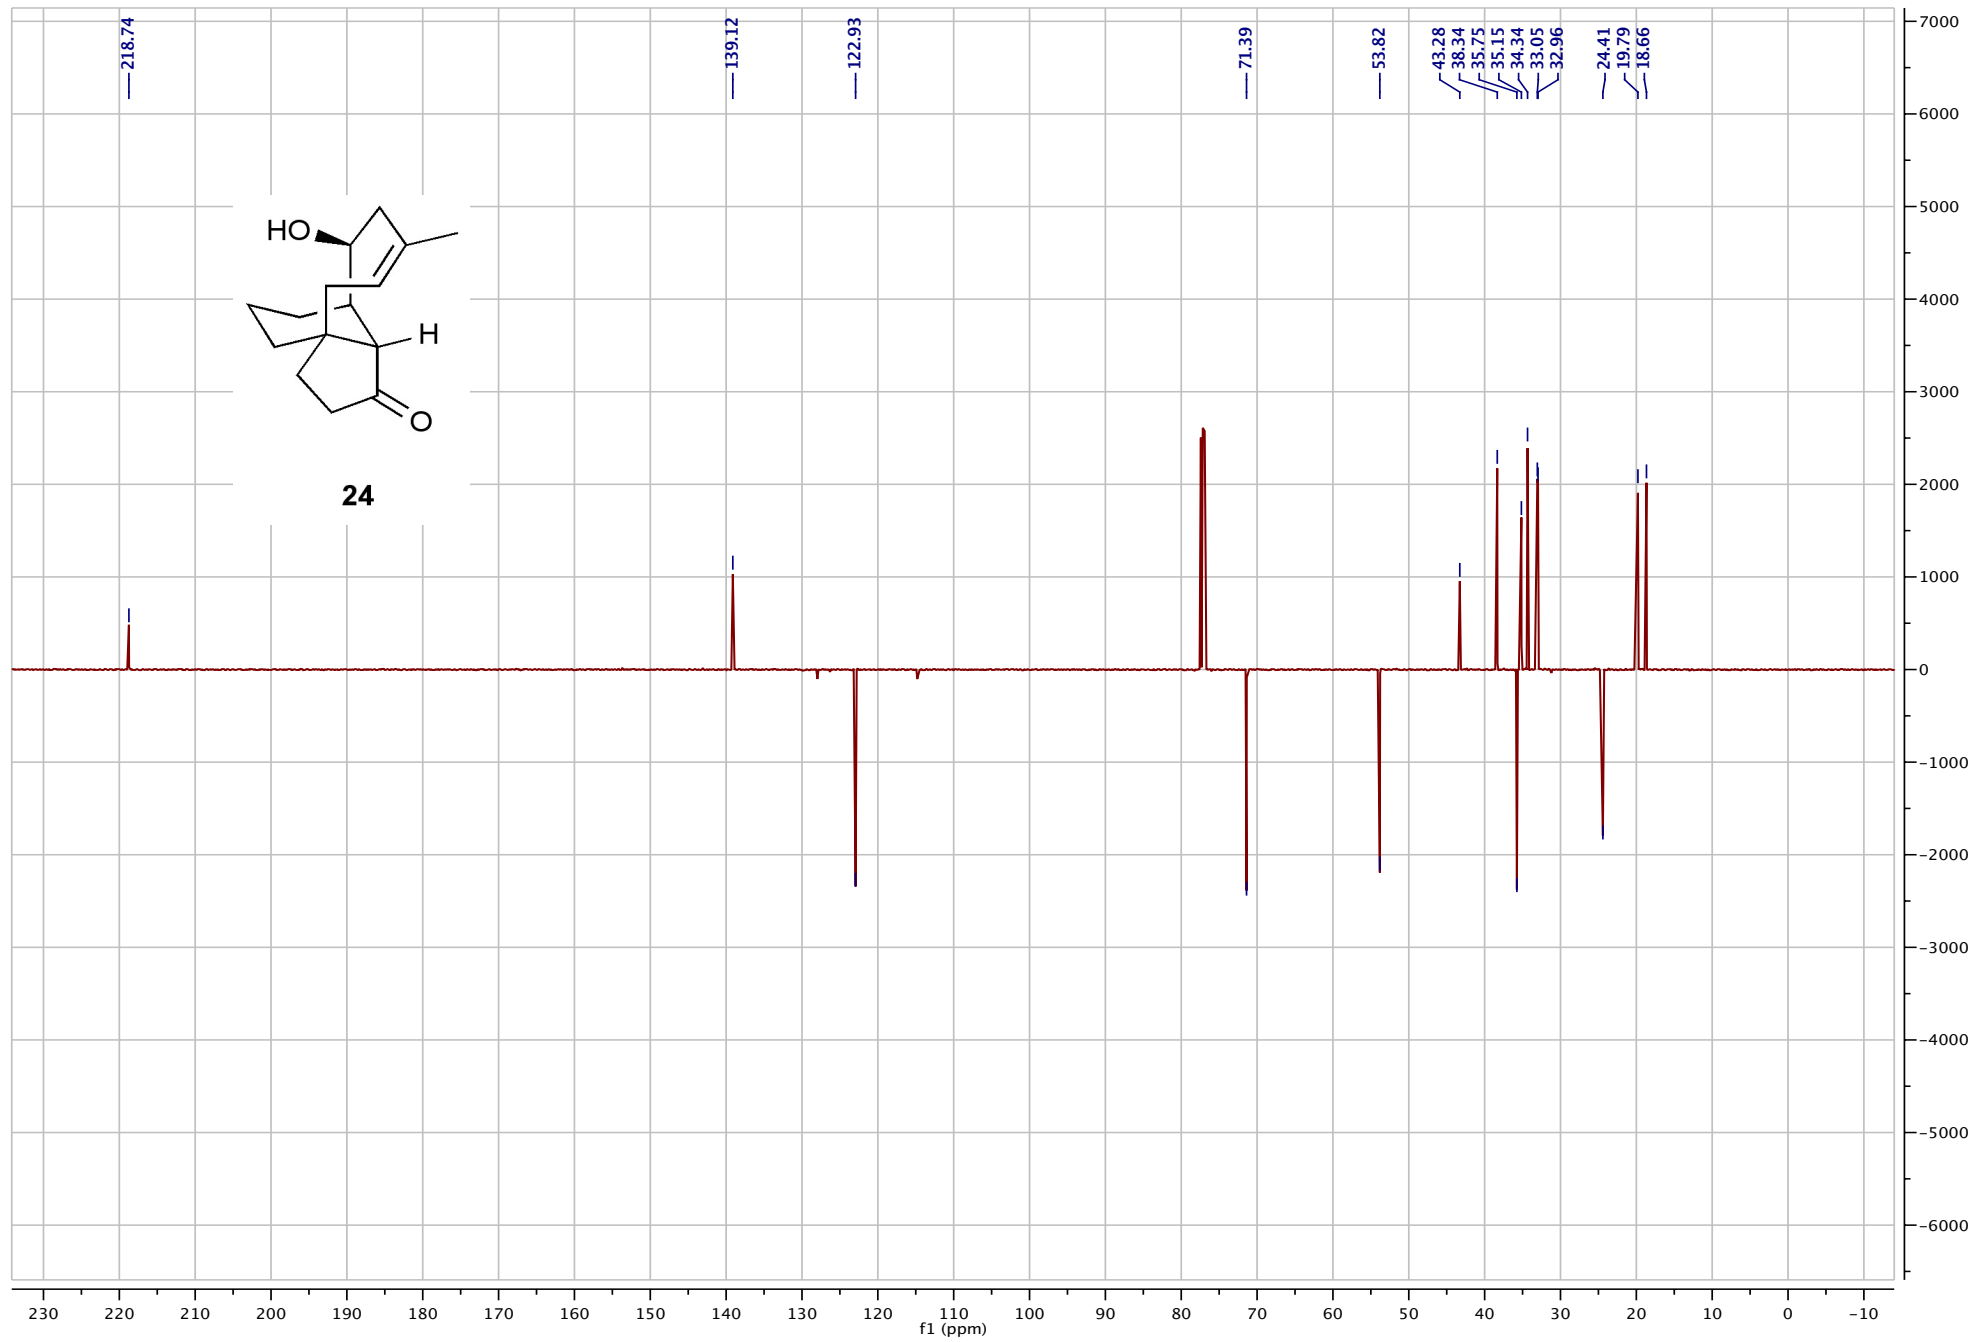

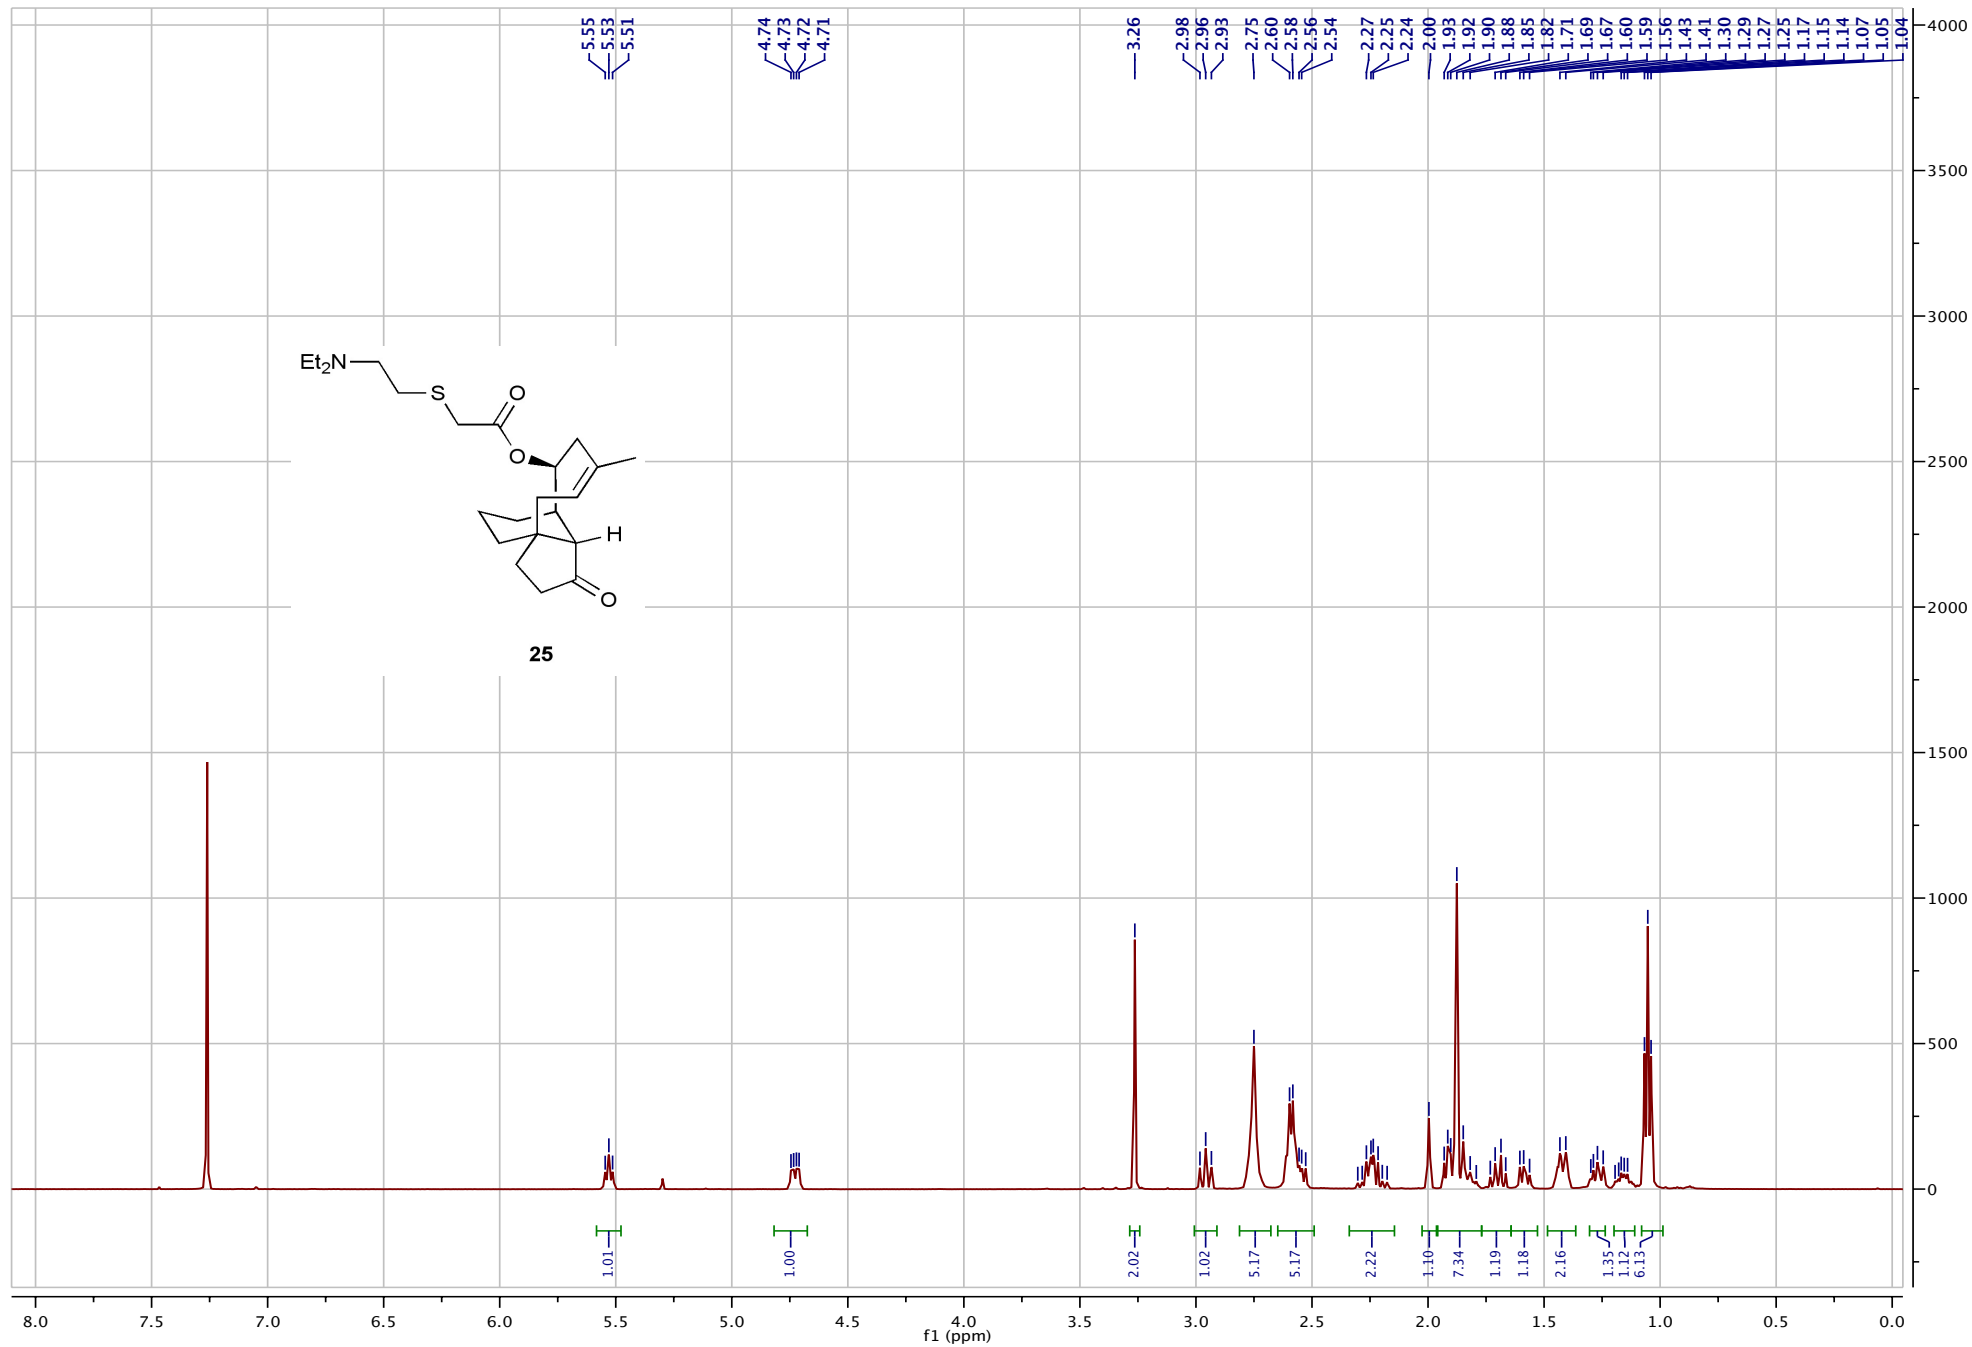

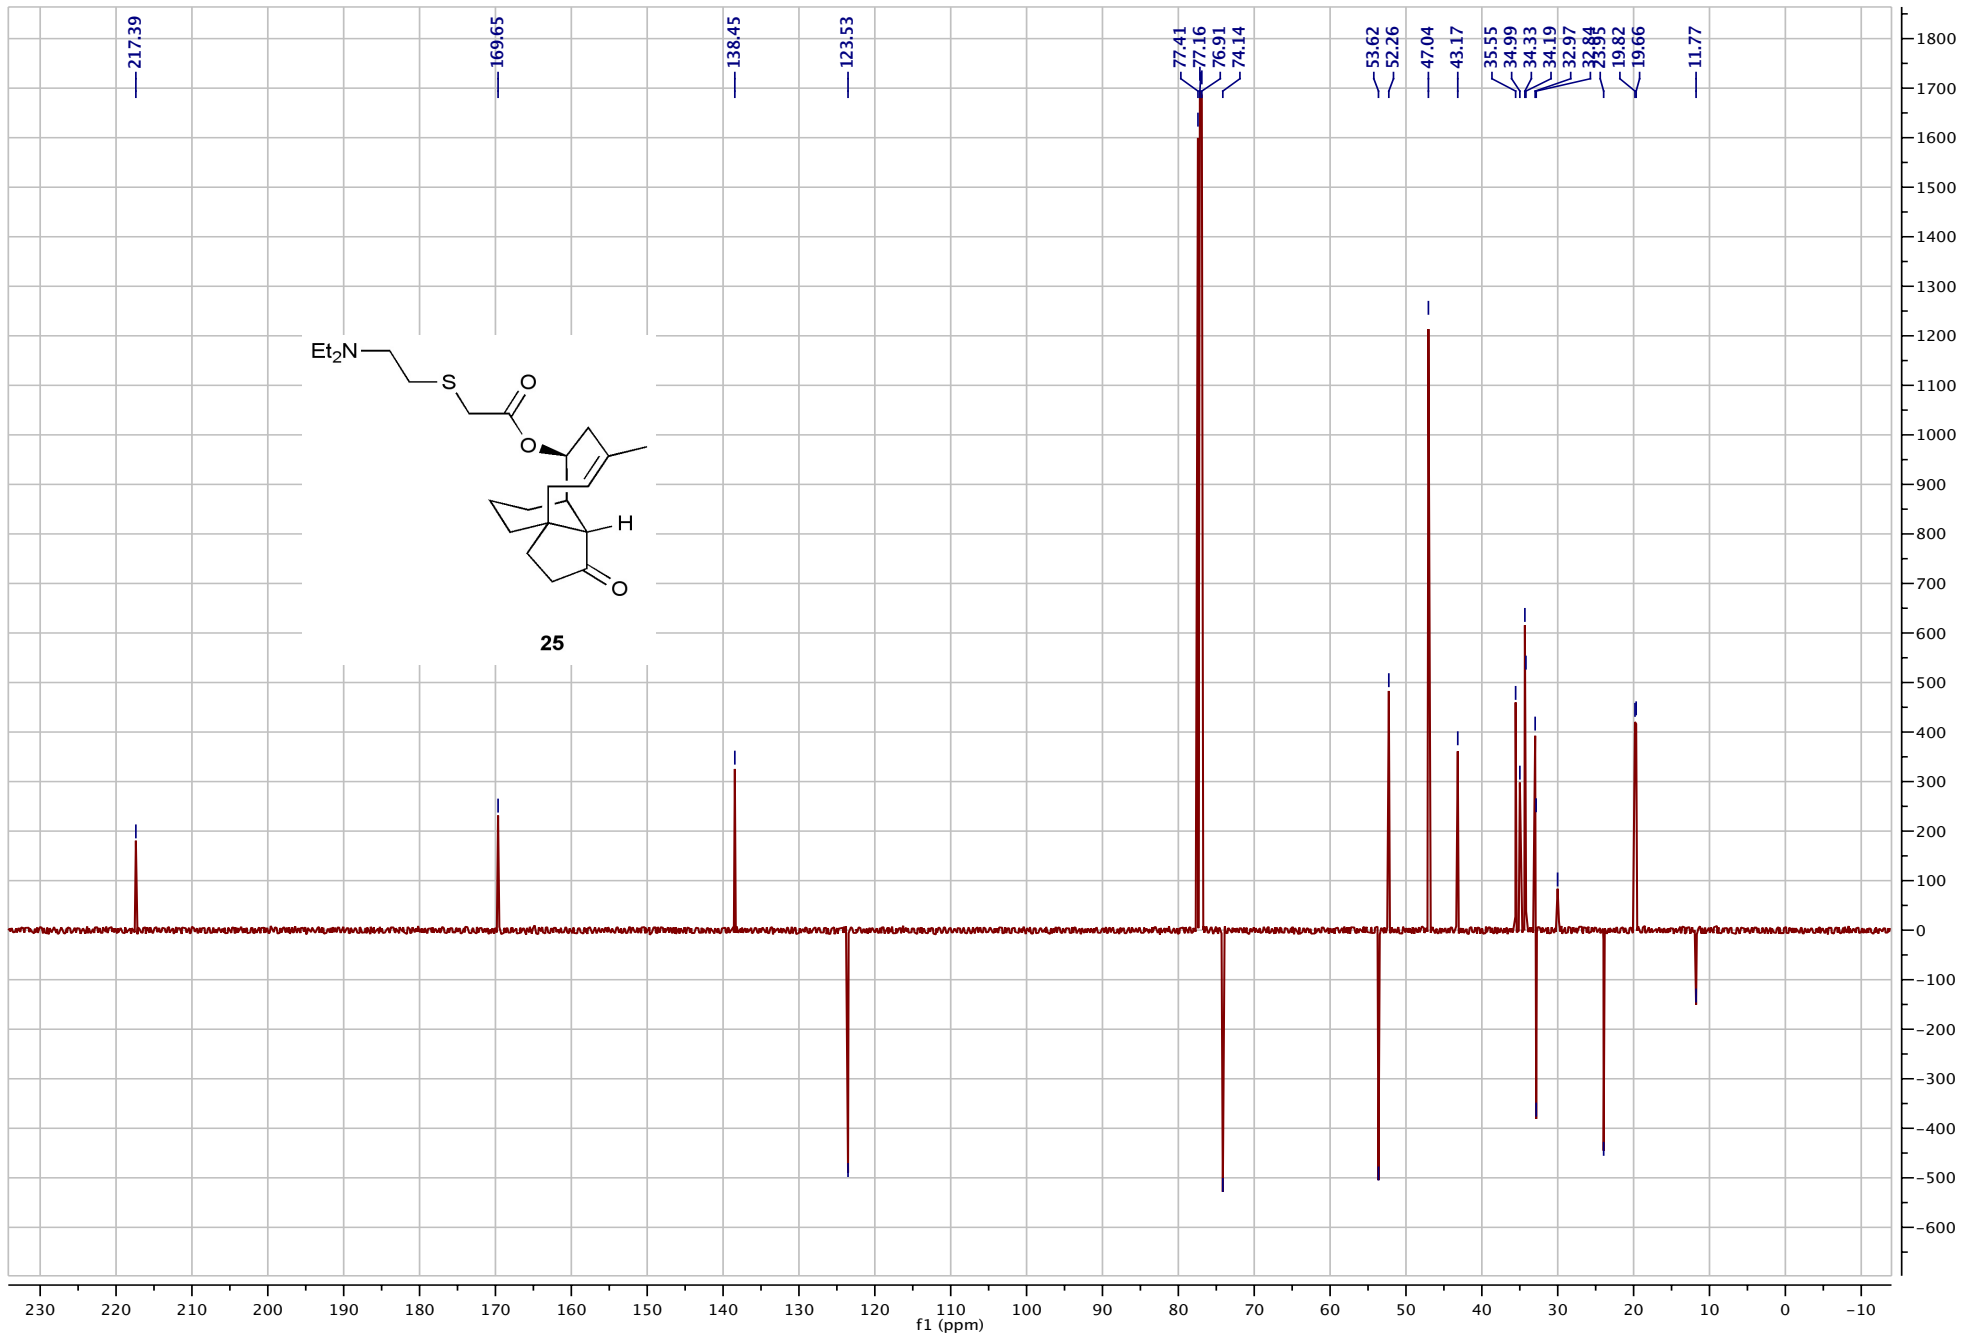

Supplement: NIHMS304157-supplement-Supplemental_Figure.pdf [file NIHMS304157-supplement-Supplemental_Figure.pdf]
